# Supplementary material for: 3D optogenetic control of arteriole diameter in vivo
Source: eLife. 2022 Sep 15;11:e72802. doi: 10.7554/eLife.72802 (PMC9481242; doi:10.7554/eLife.72802)
Supplement: Source data 1. [file elife-72802-data1.xlsx]

## Sheet: Fig2D
Tims (s)		Individual Surface Arteries														Individual Surface Veins
-7.5		1.0045	0.996004	1.03802	1.00641	0.994164	1.00085	0.994392	0.999656	0.99867	0.99248	0.999487	1.0045	0.999338		1.0065	0.998542	1.00525	1.00468	0.983334	0.996478	1.0009	0.999495	1.00409	0.999355
-6.5		1.00302	1.01272	1.05585	0.994383	0.99959	1.00329	0.992568	0.997478	1.00015	1.02481	1.00084	1.00326	0.999954		1.00606	1.00064	0.999929	0.996506	0.991833	1.00015	1.00018	0.998273	1.0021	0.99787
-5.5		1.00587	1.00678	1.00264	0.998161	1.00249	1.00979	1.01493	1.00402	0.996732	1.00112	0.999246	1.00156	1.00164		1.00285	0.999042	0.994551	1.00601	0.998258	0.998139	0.998785	0.994229	1.00305	0.996245
-4.5		1.00474	0.995375	1.02048	1.00003	0.995335	1.00526	1.01771	0.993871	0.996234	1.0003	1.00082	0.999244	0.998954		1.00474	0.998923	1.00524	1.00084	1.00015	0.998663	0.999193	0.999711	1.0025	0.993273
-3.5		0.998069	0.986443	0.999552	0.996102	0.992042	1.00062	0.998967	1.00829	1.00373	0.987141	1.00096	1.00473	1.00084		0.998524	1.00079	0.998538	0.996253	1.00524	0.998587	0.999929	1.0021	1.00002	1.00399
-2.5		0.998152	1.00193	1.0089	0.99663	1.00635	1.00196	0.993686	0.999701	0.995236	1.0069	0.999307	1.00138	0.999267		0.998817	0.997652	0.999604	1.00153	0.990453	0.997357	1.00012	1.0056	1.00154	0.998909
-1.5		1.00315	1.01029	0.973047	1.00228	1.00143	0.999181	1.00592	0.995358	1.00289	0.999204	1.00067	1.00048	1.00086		1.00119	1.00306	1.00124	1.00044	1.0106	1.00012	1.00091	0.998638	0.999505	0.99884
-0.5		0.993635	1.00784	1.03602	1.00258	0.994716	0.995761	1.00516	1.00423	0.997911	0.999431	0.998649	0.996001	0.99712		1.00034	0.998006	0.999709	1.00128	0.996984	1.00125	0.998934	0.990917	0.998552	0.999832
0.5		0.983804	0.951677	0.938677	0.987991	0.973251	0.988163	0.966094	0.959923	0.976993	0.96874	0.973035	0.968155	0.977843		1.00457	1.00212	1.00273	0.993608	0.951605	0.994537	0.999098	1.00705	1.00034	0.993495
1.5		0.903173	0.814826	0.826254	0.895013	0.873491	0.920451	0.872128	0.866195	0.888989	0.866036	0.893324	0.863828	0.874278		0.995794	0.993549	0.999256	0.987891	0.991773	0.994691	0.992626	0.99458	1.00621	0.983376
2.5		0.865427	0.775311	0.847161	0.844573	0.845384	0.891373	0.862894	0.905066	0.899985	0.882675	0.842281	0.798724	0.813637		0.98754	0.994816	0.989197	0.981513	0.99239	0.995374	0.990552	0.98239	0.996673	0.977941
3.5		0.857224	0.846055	0.855925	0.861768	0.865851	0.889591	0.911886	0.959491	0.933647	0.94006	0.832758	0.784362	0.790631		0.996405	0.99188	0.988545	0.982801	1.00496	0.995469	0.986494	0.972765	0.993369	0.971764
4.5		0.872691	0.89321	0.913498	0.888284	0.883588	0.907612	0.913248	0.974502	0.938663	0.974873	0.835693	0.803475	0.788832		0.989914	0.991404	0.994522	0.987925	1.02056	0.996239	0.986919	0.974999	0.982254	0.961877
5.5		0.891187	0.913499	0.900602	0.9081	0.919783	0.926984	0.95569	0.982798	0.944798	0.981688	0.859851	0.860962	0.833776		0.990391	0.995117	1.00191	0.985614	0.976918	0.995836	0.987301	0.976423	0.981789	0.965298
6.5		0.921779	0.919585	0.982303	0.92282	0.942791	0.946586	0.956412	0.98573	0.94375	0.978363	0.901999	0.894358	0.894826		0.991794	0.998487	0.984375	0.98592	1.01337	0.995243	0.989636	0.974563	0.979729	0.966536
7.5		0.941043	0.9387	0.97934	0.929183	0.955995	0.965298	0.96294	0.979546	0.943543	1.01443	0.928671	0.916759	0.921854		0.996341	0.993687	1.00845	0.98743	0.975985	0.998272	0.989421	0.972859	0.976978	0.972662
8.5		0.963346	0.956366	0.977884	0.928228	0.970207	0.966241	0.95506	0.98809	0.9461	0.989541	0.939386	0.927536	0.930447		0.994706	0.998224	0.991586	0.991414	0.997336	0.998648	0.990925	0.980116	0.973895	0.967969
9.5		0.961345	0.960331	0.961909	0.936645	0.973373	0.96978	0.970615	0.994653	0.956655	1.01167	0.949507	0.938222	0.938003		1.00002	0.996314	0.994142	0.982026	0.984652	0.995137	0.991834	0.974307	0.976479	0.974298
10.5		0.96519	0.953586	0.978011	0.93138	0.967498	0.970737	0.961319	0.988599	0.964786	0.99134	0.953678	0.944864	0.942577		0.999017	0.996158	0.997149	0.994089	0.980203	0.995115	0.991061	0.979751	0.97746	0.977648
11.5		0.964191	0.943552	0.966748	0.945371	0.971769	0.974711	0.967066	0.998056	0.970331	1.00105	0.959215	0.951334	0.948325		0.993666	0.996874	1.00213	0.991317	0.973319	0.996672	0.992348	0.987877	0.979039	0.976922
12.5		0.970562	0.966595	1.0042	0.941291	0.971587	0.981692	0.983168	0.987514	0.969934	1.02033	0.960291	0.951353	0.952795		0.992673	1.00081	1.00174	0.996826	1.00994	0.999983	0.991184	0.982914	0.981054	0.981769
13.5		0.96897	0.974609	0.983413	0.944727	0.972297	0.987672	0.988019	0.99462	0.961751	0.988017	0.96374	0.951177	0.960616		0.997992	0.997149	1.00289	0.991185	0.980188	1.00011	0.99131	0.979302	0.983419	0.982192
14.5		0.970516	0.969835	1.02258	0.957891	0.97868	0.98404	0.981087	0.997225	0.957343	0.992883	0.964204	0.958931	0.967581		0.999911	0.994887	1.0012	0.989621	0.998414	0.998433	0.993513	0.985425	0.984504	0.978077
15.5		0.981237	0.978721	1.01325	0.955033	0.972247	0.984414	0.98876	0.992937	0.943851	1.0154	0.962878	0.962982	0.970783		1.0007	0.999542	0.998101	0.992265	1.01173	0.999278	0.991645	0.983335	0.984954	0.974691
16.5		0.984643	1.0066	0.998266	0.965771	0.976813	0.984402	0.977912	0.992877	0.964005	1.01454	0.969203	0.962857	0.973602		1.0052	1.00129	0.9988	0.986941	0.996942	0.999315	0.992725	0.991822	0.983522	0.980819
17.5		0.987475	1.0131	1.03149	0.987743	0.977077	0.990397	1.0031	0.991023	0.972637	1.00975	0.974729	0.968607	0.979615		1.00023	0.999407	1.0009	0.984022	0.985987	1.00035	0.992203	0.993056	0.988995	0.984738
18.5		0.998173	1.02063	1.04174	0.9821	0.995238	0.990004	1.00135	0.989632	0.975189	1.00886	0.980588	0.968482	0.981095		0.99871	1.00053	1.00086	0.993481	0.997775	0.995697	0.993205	0.983501	0.985697	0.983296
19.5		1.00147	1.00718	1.05368	0.999608	0.999371	1.0004	0.988163	0.999144	0.980284	1.01603	0.979373	0.978585	0.981826		1.00322	0.997026	1.00745	0.99127	1.01588	0.996634	0.99221	0.988827	0.991099	0.982285
20.5		1.00186	1.0118	1.04958	0.997411	1.00414	1.00515	0.998483	0.997241	0.975854	0.999881	0.984104	0.984445	0.982192		1.00415	0.998618	0.998504	0.997401	0.974735	0.998801	0.995563	0.992934	0.993936	0.984103
21.5		1.00227	0.993316	1.01872	0.992163	0.99786	1.00335	0.979839	1.00225	0.98017	0.970432	0.983665	0.995194	0.986786		1.00413	1.00092	1.00154	0.998118	0.995742	0.995751	0.995176	0.988844	0.993429	0.9871
22.5		1.00364	0.995503	1.01531	0.996128	0.990246	0.996715	0.98177	0.998479	0.969216	1.00345	0.986056	1.00264	0.986036		1.00381	1.00093	1.00517	0.995671	0.973526	0.998496	0.995614	0.991511	0.996089	0.991264
23.5		0.991305	1.00287	1.03843	0.999189	0.987382	0.999938	0.987095	1.00247	0.97434	1.00146	0.985339	0.992816	0.98806		0.996341	1.00068	0.999068	0.994598	1.01616	0.998748	0.996344	0.993592	0.994207	0.986781
24.5		0.999699	1.01607	1.0193	0.993404	0.9932	1.00079	0.985035	0.998797	0.983428	1.0022	0.983972	0.992108	0.988125		0.999232	1.00401	1.00283	1.00114	1.02191	0.999405	0.995311	0.994011	0.993622	0.992153
25.5		0.998133	0.988998	0.990949	0.993524	0.989407	0.998476	0.995477	1.00006	0.981472	1.0032	0.985191	1.00025	0.995632		1.00077	1.00177	1.00058	1.00136	0.998435	1.00142	0.996475	0.990776	0.997848	0.994748
26.5		0.994462	1.00146	0.999676	0.993339	0.984622	0.998511	0.97576	0.998946	0.993407	0.996912	0.990724	0.997279	0.992197		0.995298	1.00223	1.00351	0.999572	0.987913	0.99884	0.996128	0.991742	1.0007	0.989351
27.5		1.00035	1.01195	1.00369	0.994437	0.981961	0.99578	0.970465	0.992614	0.986324	0.983044	0.991448	1.00173	0.993259		0.99786	1.00011	1.00232	1.00093	0.999277	0.998206	0.995953	0.992575	1.0002	0.999751
28.5		0.996765	1.00956	1.01201	0.996315	0.989224	0.991466	1.00041	1.0066	0.991472	1.0115	0.991462	1.00341	0.993087		0.995764	0.997874	1.01247	0.996227	0.997466	1.00367	0.996731	0.997873	0.995066	0.991121
29.5		0.995956	0.991012	0.991595	1.00264	0.993065	0.994213	1.00915	1.00374	0.991442	0.998518	0.992011	1.00609	0.998777		1.00399	0.997727	1.01039	0.99415	0.987629	1.00012	0.997626	0.994436	0.997681	0.995751
30.5		1.00454	1.01385	1.01778	0.997781	0.999912	0.993444	0.991412	0.987847	0.995863	0.99245	0.995025	1.00015	1.00025		1.00558	0.999336	1.00426	0.996964	0.985783	0.996766	0.997678	1.00223	0.996721	0.994516
31.5		0.998055	1.01312	0.999632	0.998162	0.995679	0.995991	1.01426	1.00182	0.988475	0.997561	0.993964	0.998777	1.00273		1.00252	0.999212	0.993677	1.00377	0.999894	1.00252	0.99853	1.00426	1.00441	1.00131
32.5		1.00634	0.99118	1.01885	1.00957	0.999459	0.994422	1.02424	1.00461	0.993902	1.00611	0.996093	0.998962	1.00194		1.01073	1.00471	1.00512	1.0083	1.00593	1.00108	1.00008	0.991574	0.998058	0.995853

## Sheet: Fig2G
Tims (s)		Individual Penetrating Arteries
-7.5		0.996161	0.997332	0.983422	NaN	NaN
-6.5		1.01281	0.99514	0.979139	NaN	NaN
-5.5		1.01043	1.0032	0.986417	NaN	NaN
-4.5		0.985707	1.00916	1.01107	NaN	NaN
-3.5		0.986232	1.01261	0.998902	0.994267	1.00169
-2.5		0.99492	1.00023	0.995625	0.989945	0.998279
-1.5		1.00585	0.995547	1.00132	0.998874	1.00218
-0.5		1.01146	0.995563	0.999851	1.00193	0.998829
0.5		0.97305	0.954784	0.95786	0.961181	0.986712
1.5		0.858898	0.848905	0.846976	0.893005	0.934513
2.5		0.905952	0.841475	0.831995	0.858864	0.910017
3.5		1.00079	0.903325	0.848425	0.862804	0.97898
4.5		1.00399	0.94715	0.89022	0.900356	0.989908
5.5		0.998662	0.959741	0.926882	0.912103	0.985425
6.5		1.00472	0.966974	0.931501	0.918322	0.980493
7.5		1.01707	0.98399	0.935583	0.930601	0.97671
8.5		1.0029	0.980529	0.941833	0.929444	0.979389
9.5		0.993933	0.981732	0.933831	0.926076	0.976148
10.5		1.00131	0.977421	0.929745	0.938163	0.981329
11.5		1.01592	0.980723	0.955759	0.938103	0.977123
12.5		1.00866	0.980839	0.9455	0.950257	0.983769
13.5		1.00033	0.978221	0.942983	0.959203	0.982104
14.5		0.998777	0.991606	0.966893	0.953412	0.98362
15.5		0.99724	0.995666	0.975248	0.953275	0.982509
16.5		1.00567	1.00656	0.982576	0.949587	0.981903
17.5		0.989957	1.0068	0.988792	0.956995	0.979887
18.5		0.990312	1.01199	0.987437	0.951259	0.980215
19.5		1.00459	1.00723	0.99765	0.961607	0.987993
20.5		1.00364	1.00315	0.996244	0.966822	0.988465
21.5		1.00607	1.00475	0.994453	0.973815	0.982822
22.5		1.00923	1.00431	1.00537	0.977208	0.989484
23.5		1.00878	1.01209	1.01548	0.964208	0.986618
24.5		1.00607	1.01409	1.02099	0.966914	0.98928
25.5		1.00088	1.02316	1.02917	0.970078	0.997353
26.5		1.00019	1.02683	1.02763	0.974606	0.999571
27.5		1.00554	1.02018	1.0326	0.981964	0.998097
28.5		0.994762	1.02042	1.01277	0.980386	1.00023
29.5		0.987908	1.01739	1.01402	0.987651	1.0008
30.5		0.999834	1.00781	1.01187	0.991172	0.995578

## Sheet: Fig2I
Tims (s)		Individual Surface Arteries								Individual Penetrating Arteries
-100.5		0.0473037	0.849257	-1.44836	2.65487	9.51508	2.14431	-0.716134		-1.51639	-5.24372	-0.780163	2.90329
-99.5		-0.662252	0.849257	0.125945	4.42478	10.0244	9.53347	-1.01608		-3.72103	-4.47641	0.77912	2.3667
-98.5		-2.08136	1.38004	-1.76322	0	1.87449	4.31759	-1.01608		-2.78409	2.36559	-0.189039	4.28515
-97.5		-4.44655	0.849257	-2.39295	5.30973	2.89324	13.88	-1.01608		-2.64505	-3.73885	0.845244	2.05522
-96.5		-3.02744	0.849257	-1.76322	3.53982	5.94947	20.8345	-1.01608		-0.811598	-4.88567	-2.82114	3.03224
-95.5		-3.50047	0.318471	-3.65239	2.65487	0.855746	17.3573	-1.01608		-1.39973	-1.07714	-3.34874	1.03071
-94.5		-3.02744	1.11465	-1.44836	2.65487	0.346373	17.3573	-0.116231		-1.92989	-0.444262	-2.49568	1.20874
-93.5		-4.44655	0.849257	0.125945	1.76991	-1.18174	25.1811	-1.01608		-2.1256	-2.37259	-3.4067	1.32928
-92.5		-1.60833	-0.7431	2.64484	2.65487	-0.162999	21.7039	-1.01608		-1.6509	-1.51802	-2.66404	0.465757
-91.5		-2.5544	0.849257	-1.76322	2.65487	-2.20049	15.6187	-1.01608		1.42286	1.45456	-1.39408	1.32171
-90.5		-3.02744	0.849257	-1.76322	4.42478	-6.27547	16.488	0.18372		-0.675021	-7.39654	-3.85817	1.45521
-89.5		-3.02744	0.849257	-0.503778	2.65487	-6.27547	18.2266	-1.01608		0.39538	6.15455	-1.39056	-0.526726
-88.5		-1.60833	1.38004	1.07053	2.65487	-0.672372	15.184	0.483671		0.36206	-0.893014	-2.30451	1.98314
-87.5		-1.60833	2.44161	0.755668	3.53982	-1.18174	8.66416	1.98343		2.01171	0.0775033	-4.26071	1.31512
-86.5		-0.189215	0.849257	1.38539	4.42478	2.89324	17.3573	-1.01608		2.01489	1.69873	-1.48011	3.34999
-85.5		4.06812	1.38004	2.01511	4.42478	2.89324	15.6187	1.98343		1.00065	-5.01457	-1.74899	4.00287
-84.5		4.06812	-1.80467	-0.503778	2.65487	4.93073	14.7493	-0.416182		1.47691	0.872917	-1.48245	1.28279
-83.5		5.48723	0.318471	0.125945	4.42478	1.87449	17.3573	0.783623		2.78906	-7.75701	-1.47722	2.94535
-82.5		5.48723	0.0530786	-0.81864	3.09735	0.346373	13.0107	1.98343		1.19468	-1.8793	-1.51973	1.98408
-81.5		5.48723	-1.80467	0.125945	3.53982	7.98696	17.3573	1.98343		1.77611	-2.54539	-4.05845	3.40739
-80.5		6.90634	-0.7431	-1.76322	3.53982	6.96822	18.2266	1.98343		2.29438	-1.47277	-1.62169	4.32054
-79.5		5.96026	0.318471	3.27456	2.65487	5.94947	17.3573	1.98343		2.87129	0.686628	0.0811781	1.80811
-78.5		5.48723	-0.212314	4.53401	2.65487	4.93073	19.0959	1.98343		1.57627	-4.30516	1.06768	2.1287
-77.5		4.77767	4.29936	3.58942	4.42478	3.40261	18.2266	2.28338		0.238327	1.08679	-0.98782	5.68812
-76.5		6.4333	4.56476	3.90428	2.65487	11.0432	17.3573	1.98343		0.158502	-6.66432	1.08863	0.540244
-75.5		4.54115	6.15711	4.53401	4.42478	5.94947	21.7039	1.98343		0.835437	-5.00268	-2.8931	3.23122
-74.5		3.59508	6.15711	5.79345	6.19469	10.0244	32.1356	1.98343		2.7505	4.79933	-1.13396	4.67329
-73.5		4.06812	6.15711	4.53401	4.42478	2.89324	32.1356	3.18323		1.97273	2.20839	1.81068	3.16378
-72.5		3.12204	5.62633	6.42317	4.42478	17.1557	28.6584	1.98343		0.326425	3.85581	3.57675	4.89247
-71.5		4.06812	6.15711	6.42317	3.9823	13.5901	30.397	2.88328		1.14866	1.06842	-0.282765	3.97835
-70.5		5.48723	4.56476	5.79345	5.30973	13.0807	26.9197	3.18323		-0.0163219	-1.32965	1.27287	6.60631
-69.5		3.12204	2.44161	0.755668	5.30973	9.0057	20.8345	3.18323		-0.633048	-1.88472	2.52412	5.46375
-68.5		2.17597	3.50318	3.27456	6.19469	7.98696	19.0959	4.38304		0.00724762	0.452458	-2.8032	4.30369
-67.5		1.70293	1.91083	4.53401	2.65487	6.96822	15.6187	1.98343		2.35383	-1.5289	-2.46656	3.18163
-66.5		1.70293	4.03397	2.01511	3.53982	-0.162999	13.88	0.783623		2.0605	3.90286	-2.029	3.54956
-65.5		-0.189215	2.70701	0.125945	5.30973	-0.162999	13.4454	1.98343		-0.283821	-4.4496	-3.86043	4.59967
-64.5		-0.189215	2.44161	3.27456	6.19469	-0.162999	8.66416	1.98343		0.121811	-4.42848	1.51621	1.84935
-63.5		1.70293	1.38004	2.01511	6.19469	-2.20049	8.66416	1.98343		-0.470508	-4.67868	-1.80237	1.0087
-62.5		1.70293	5.09554	4.53401	5.30973	1.87449	6.92553	1.98343		0.258042	1.94489	-0.800065	0.783123
-61.5		2.64901	4.56476	5.16373	5.30973	-1.18174	4.31759	1.98343		1.10294	2.59123	-4.23649	1.28414
-60.5		2.17597	5.09554	2.64484	6.19469	-1.18174	10.4028	3.18323		-1.13133	1.02792	0.330806	2.57801
-59.5		1.93945	4.83015	4.53401	5.30973	-1.69112	9.53347	1.98343		0.325881	-0.857496	-0.997701	3.3827
-58.5		2.64901	1.91083	5.79345	3.53982	-0.162999	6.05622	3.78314		1.52021	-4.90831	-1.11543	-0.0266844
-57.5		3.59508	4.03397	2.01511	7.07965	-2.20049	0.840336	3.18323		-0.908714	-3.09456	-6.44265	3.96229
-56.5		4.06812	1.91083	-0.503778	-2.65487	-3.21923	0.840336	4.98294		0.0851229	-1.95855	-5.98181	1.44341
-55.5		3.59508	1.91083	0.125945	3.53982	-5.25672	0.840336	4.98294		-0.428854	-1.29153	-4.62257	-2.65124
-54.5		3.12204	1.38004	-1.1335	4.42478	-5.25672	2.57896	3.78314		1.71458	-3.24192	-2.2363	3.30034
-53.5		1.93945	-1.53928	-5.2267	1.76991	7.98696	6.92553	4.08309		-1.25284	-5.68338	-0.352202	2.62573
-52.5		1.2299	-2.33546	-3.02267	2.65487	10.0244	13.88	4.98294		2.2076	-2.48718	-5.05812	4.00355
-51.5		1.70293	-2.33546	-7.43073	-0.884956	11.0432	17.3573	4.98294		1.09339	-0.979332	-2.05414	1.60412
-50.5		0.756859	-4.4586	-6.17128	0	15.1182	17.3573	4.98294		0.798974	-4.05494	-1.21516	6.2703
-49.5		0.756859	-1.27389	-6.80101	4.42478	12.0619	19.0959	4.98294		1.81551	-2.35306	0.402445	2.98388
-48.5		-2.08136	-3.39703	-7.43073	-1.76991	7.98696	16.488	4.98294		0.719236	-6.92522	-2.55242	3.98659
-47.5		0.0473037	-1.00849	-3.02267	0.442478	5.4401	13.4454	5.88279		-0.625692	-5.54098	-2.74004	1.03355
-46.5		-0.662252	-1.27389	-4.91184	5.30973	1.87449	7.79484	4.98294		-1.2795	-1.74913	-1.30341	6.43953
-45.5		-1.60833	-1.80467	-2.39295	1.76991	0.855746	-0.0289771	4.98294		-0.627954	-1.95206	-4.90631	0.0741111
-44.5		-2.08136	0.318471	-0.503778	-0.884956	0.855746	5.1869	4.98294		-1.05747	-0.421285	-6.98138	2.52516
-43.5		-2.08136	1.91083	-2.39295	1.76991	2.89324	0.840336	4.98294		-1.70945	-4.16516	-2.34935	2.9727
-42.5		-0.662252	1.91083	-1.1335	-1.76991	-1.18174	-4.37554	4.98294		-2.28588	-1.58339	-2.48972	0.216224
-41.5		-0.89877	3.76858	2.9597	3.09735	1.87449	-1.7676	4.98294		-1.46326	-6.74817	-4.27306	2.41925
-40.5		-0.662252	1.38004	3.27456	0.884956	4.93073	5.1869	4.98294		-0.0471048	0.00873912	-0.781808	-0.898416
-39.5		-2.08136	1.38004	-0.503778	4.42478	2.89324	-2.63692	4.98294		-1.68053	-4.64376	-2.80836	0.364309
-38.5		-1.13529	-1.27389	-1.76322	0	6.96822	6.05622	4.98294		-1.67314	-8.77858	-1.27089	3.71016
-37.5		-3.02744	1.38004	-1.76322	-1.76991	4.93073	6.92553	4.98294		0.585044	-0.565151	1.28268	1.77171
-36.5		-1.13529	3.50318	2.01511	0.884956	2.89324	6.92553	4.98294		0.378789	-6.67049	-2.04003	5.2277
-35.5		-2.08136	3.76858	2.64484	-0.884956	-2.70986	5.62156	4.38304		1.40951	3.44522	-1.906	2.77694
-34.5		-0.662252	4.56476	2.64484	0.884956	4.93073	1.70965	4.98294		-0.846743	0.264361	-2.40344	1.59325
-33.5		-1.13529	5.62633	2.64484	5.30973	-0.162999	0.840336	4.98294		-1.11093	-0.79215	-5.22993	0.405705
-32.5		-2.5544	5.62633	2.01511	-0.884956	-7.29421	-0.0289771	4.98294		-0.254633	1.31303	-2.75222	2.12202
-31.5		-3.02744	5.09554	2.01511	1.76991	1.87449	-11.33	4.98294		-1.38514	-6.00577	-6.65227	3.70929
-30.5		-2.5544	4.56476	5.79345	5.30973	-3.21923	-6.98348	4.98294		-1.09464	2.93502	-3.01129	0.250609
-29.5		-3.97351	5.89172	4.21914	1.32743	0.346373	-2.20226	3.48318		-0.909194	4.80207	-4.75493	0.708816
-28.5		-4.44655	6.6879	4.53401	3.53982	-1.18174	-4.37554	1.98343		-1.94512	0.127573	-3.19692	0.696531
-27.5		-3.50047	6.15711	4.53401	0.884956	-1.18174	-0.0289771	4.38304		-2.16706	2.1498	-3.98	2.51714
-26.5		-3.50047	7.74947	5.79345	3.53982	2.89324	-6.11417	2.58333		-0.90196	-0.676383	-3.01838	0.290037
-25.5		-5.39262	6.15711	5.16373	0.884956	1.87449	-0.89829	4.98294		-0.269979	-3.23102	-4.74622	2.38414
-24.5		-4.91958	5.09554	4.53401	0	3.91198	-8.72211	1.98343		-0.836938	-8.92255	-4.04231	-2.13111
-23.5		-2.79092	4.03397	4.84887	4.42478	-2.70986	-3.94089	2.28338		0.163911	0.940441	-5.1404	2.04735
-22.5		-0.662252	3.50318	3.90428	5.30973	-1.18174	-7.8528	1.98343		2.33348	-4.50822	-3.89202	1.715
-21.5		-2.08136	4.03397	2.01511	2.65487	1.87449	-4.37554	4.38304		-0.788956	-1.95224	-3.23777	0.191466
-20.5		-3.02744	4.03397	0.125945	1.76991	2.89324	-7.8528	4.38304		-1.40843	-7.14006	-6.35379	0.376538
-19.5		-5.39262	4.03397	1.38539	4.42478	-2.20049	-2.63692	1.98343		-1.28809	-3.48284	-0.909497	0.129878
-18.5		-2.5544	2.9724	2.64484	0.884956	-0.162999	-10.4607	0.783623		0.222234	1.73549	-3.22467	-0.481385
-17.5		-3.97351	2.70701	2.9597	2.65487	-3.21923	-3.50623	2.28338		-1.01272	-1.53086	-3.73209	-1.86308
-16.5		-2.08136	0.318471	0.755668	0.884956	-3.21923	-3.50623	4.98294		0.429931	-6.70623	-5.2475	-1.47747
-15.5		0.756859	0.318471	1.38539	-0.884956	-5.25672	0.840336	1.98343		0.243812	-2.1243	-3.73781	1.53531
-14.5		0.756859	1.38004	-0.503778	4.42478	-5.25672	-6.98348	0.783623		-0.821646	-7.15364	-3.09411	2.48832
-13.5		-2.08136	1.38004	-0.503778	0.884956	-5.25672	-4.37554	-1.01608		0.533073	-7.04067	-4.42243	-2.39069
-12.5		-1.13529	1.38004	1.38539	0	-3.21923	-4.37554	4.38304		-2.00501	-2.67446	-6.1458	0.94442
-11.5		-1.13529	3.50318	1.38539	0.442478	-2.70986	-3.07157	-0.416182		0.373651	-1.59795	-2.30562	0.504603
-10.5		1.70293	2.9724	5.16373	0.884956	3.91198	-5.24486	-1.01608		-1.54374	-0.863913	-5.32295	-1.85737
-9.5		2.17597	3.50318	2.01511	1.76991	6.96822	-0.89829	-0.416182		0.341205	-3.28527	-3.08793	-0.900258
-8.5		0.756859	6.15711	2.64484	2.65487	6.96822	3.44828	1.98343		-0.20511	-4.32864	-1.89339	3.93283
-7.5		1.2299	4.03397	5.16373	0	5.94947	1.70965	3.78314		1.97679	-3.37566	-2.17999	-0.211775
-6.5		-1.60833	6.6879	5.79345	3.53982	6.96822	-10.4607	-1.01608		-0.965852	-0.071588	-3.86602	0.910666
-5.5		-2.08136	6.42251	6.42317	2.65487	3.91198	-8.72211	0.483671		-1.66676	-2.38882	-2.0674	0.493685
-4.5		-1.60833	7.74947	5.79345	-2.65487	3.91198	-6.11417	1.38353		0.566687	1.2878	-3.3388	0.611525
-3.5		-3.97351	6.15711	7.68262	0.884956	-1.18174	-4.37554	-1.01608		-0.0811871	-0.642728	-3.18399	1.34733
-2.5		-3.50047	4.56476	7.0529	2.65487	5.94947	3.44828	4.98294		-0.0157088	-3.83351	-3.82427	2.40127
-1.5		-3.02744	4.56476	5.16373	5.30973	9.0057	0.840336	-0.416182		-0.568636	-7.85218	-5.31332	0.722347
-0.5		-1.60833	3.50318	5.79345	-1.76991	10.0244	-0.0289771	-1.01608		2.56891	-2.56893	-3.3409	2.19076
0.5		-0.189215	5.62633	4.21914	-0.884956	4.42135	-0.463634	1.38353		0.253413	-2.48354	-3.53326	-1.14319
1.5		-10.123	-6.05096	-8.69018	-0.884956	-14.4254	-16.5459	1.98343		-7.75909	-3.61133	-10.8574	-3.8857
2.5		-13.4342	-7.64331	-16.8766	2.65487	-15.4442	-41.3214	-1.01608		-4.23615	-4.35028	-8.39803	-4.93972
3.5		-17.2185	-11.8896	-21.9144	3.53982	-23.5941	-26.9777	-4.0156		-8.40032	-11.2876	-13.9139	-6.6316
4.5		-24.3141	-18.259	-36.398	5.30973	-33.7816	-46.1026	-4.0156		-10.5471	-5.84504	-15.114	-5.50216
5.5		-20.7663	-21.4437	-33.8791	-3.9823	-16.9723	-39.1481	-2.51584		-0.447363	-13.0114	-10.9778	-6.10481
6.5		-21.9489	-25.69	-38.9169	-2.65487	-23.5941	-45.2333	-7.01511		-4.98596	-13.3158	-12.4188	-7.37606
7.5		-24.3141	-28.3439	-37.6574	-4.42478	-14.4254	-28.7163	-7.01511		-0.812774	-14.7887	-10.3784	-7.14666
8.5		-20.0568	-24.6285	-30.7305	-2.65487	-13.4067	-35.6708	-7.01511		-4.02069	-15.7155	-16.5606	-7.57609
9.5		-22.895	-29.4055	-41.4358	-6.19469	-30.7253	-37.4094	-10.0146		-7.36803	-13.7547	-17.5973	-12.3784
10.5		-26.6793	-30.9979	-38.2872	-5.30973	-28.6879	-30.4549	-10.0146		-3.73224	-4.60858	-11.351	-7.52975
11.5		-21.9489	-30.7325	-32.6196	-4.86726	-23.0848	-35.2362	-11.5144		-7.6049	-15.1074	-15.4157	-9.93133
12.5		-24.3141	-30.9979	-34.5088	-7.07965	-13.4067	-23.5004	-13.0141		-1.89069	-13.637	-11.9222	-6.8892
13.5		-20.0568	-26.7516	-28.8413	-4.42478	-17.4817	-53.0571	-10.0146		-2.9645	-15.3746	-10.9494	-6.92935
14.5		-24.3141	-29.4055	-40.1763	-9.73451	-23.5941	-50.4491	-10.0146		-8.57339	-16.3984	-16.0708	-6.16147
15.5		-25.7332	-32.0594	-41.4358	-8.84956	-18.5004	-46.7546	-13.0141		-2.254	-10.2212	-8.72897	-4.67203
16.5		-21.4759	-25.69	-33.8791	-7.07965	-12.3879	-34.8015	-13.0141		-6.41445	-12.448	-10.9227	-7.38025
17.5		-23.8411	-32.3248	-45.2141	-8.84956	-19.5192	-32.1936	-12.7142		-5.41043	-17.32	-9.75974	-5.92405
18.5		-17.6916	-27.8132	-29.471	-5.30973	-11.3692	-32.1936	-10.6145		-4.63219	-12.5673	-9.79106	-8.00496
19.5		-24.3141	-32.5902	-40.806	-10.6195	-21.5566	-25.0217	-13.0141		-7.09238	-20.0741	-12.3559	-8.70657
20.5		-23.368	-33.6518	-39.5466	-10.6195	-20.5379	-49.5798	-13.0141		-1.13188	-16.9483	-9.60668	-6.09163
21.5		-17.6916	-28.3439	-33.2494	-9.73451	-21.5566	-44.364	-13.0141		-5.6663	-17.4868	-10.9376	-6.01344
22.5		-23.368	-35.7749	-42.6952	-10.6195	-30.7253	-40.8867	-13.614		-8.59581	-18.1729	-9.60856	-9.36737
23.5		-18.4011	-29.1401	-32.3048	-11.5044	-22.066	-36.5401	-13.614		-1.60585	-19.3631	-10.4612	-7.21816
24.5		-21.0028	-33.6518	-36.398	-13.2743	-26.6504	-28.7163	-13.0141		-5.37749	-19.8429	-13.1033	-10.8791
25.5		-18.6377	-30.9979	-37.0277	-10.6195	-20.5379	-37.4094	-14.2139		-0.314343	-19.3791	-7.50849	-8.40642
26.5		-14.8534	-28.3439	-34.5088	-12.3894	-13.4067	-50.4491	-15.4137		-3.28311	-13.2932	-12.0338	-8.6107
27.5		-21.0028	-30.9979	-46.4736	-14.1593	-31.7441	-40.8867	-16.0136		-8.58585	-13.6656	-15.758	-9.55265
28.5		-20.0568	-30.9979	-42.6952	-7.07965	-26.6504	-40.0174	-16.0136		-1.05934	-17.9505	-10.2977	-7.57424
29.5		-19.5837	-25.69	-34.194	-10.177	-26.141	-44.9435	-14.5139		-6.44145	-15.9344	-13.3432	-8.5974
30.5		-21.4759	-28.3439	-37.0277	-13.2743	-29.7066	-33.9322	-16.0136		-0.662046	-16.7015	-11.2914	-9.03682
31.5		-16.7455	-27.8132	-35.7683	-9.73451	-16.4629	-43.4946	-13.0141		-5.22737	-19.9245	-13.7506	-10.055
32.5		-21.9489	-32.0594	-48.9924	-12.3894	-32.7628	-35.6708	-16.0136		-6.53379	-15.5096	-13.4201	-8.56183
33.5		-21.0028	-30.4671	-38.9169	-13.2743	-28.6879	-28.7163	-16.0136		-1.37301	-14.295	-8.53837	-7.75979
34.5		-19.5837	-26.7516	-30.1008	-9.73451	-20.5379	-20.8925	-16.0136		-5.18426	-16.5318	-15.2422	-9.62771
35.5		-23.1315	-30.9979	-34.5088	-12.3894	-27.1597	-37.8441	-16.0136		-3.65085	-17.4	-11.4869	-9.29204
36.5		-21.9489	-28.3439	-33.2494	-7.07965	-20.5379	-27.847	-14.8138		-6.59955	-16.5616	-13.5216	-8.72787
37.5		-26.6793	-32.0594	-43.9547	-15.0442	-34.8003	-43.4946	-16.0136		-7.72184	-14.1715	-13.3297	-11.9844
38.5		-23.368	-28.3439	-43.9547	-13.2743	-28.6879	-43.4946	-14.8138		-2.53785	-15.745	-12.0533	-8.11091
39.5		-19.5837	-25.69	-34.5088	-11.5044	-22.5754	-43.4946	-14.2139		-6.86867	-19.0716	-12.3018	-7.83028
40.5		-21.9489	-30.9979	-47.1033	-15.0442	-31.7441	-31.9038	-16.0136		-6.75294	-17.4098	-11.8665	-8.84125
41.5		-17.869	-29.9363	-39.2317	-15.4867	-22.066	-38.2788	-15.4137		-3.2229	-18.4145	-10.4274	-8.09374
42.5		-19.5837	-31.5287	-43.9547	-15.0442	-26.6504	-28.7163	-16.0136		-7.18534	-19.7828	-12.9513	-8.39414
43.5		-19.5837	-28.8747	-43.9547	-16.8142	-23.5941	-24.6595	-16.0136		-1.08827	-16.1975	-9.29575	-6.527
44.5		-19.5837	-25.69	-39.5466	-11.5044	-25.6316	-27.847	-16.0136		-6.45085	-12.6101	-15.2059	-7.82922
45.5		-26.2062	-33.121	-48.3627	-14.1593	-32.7628	-44.364	-17.8134		-8.16878	-14.5745	-14.8993	-10.6464
46.5		-24.3141	-33.6518	-46.4736	-15.9292	-29.7066	-46.9719	-16.0136		-3.56941	-18.6814	-9.20518	-8.76083
47.5		-21.9489	-31.5287	-39.5466	-12.3894	-30.7253	-29.151	-15.7137		-7.55637	-15.9435	-11.6641	-10.1498
48.5		-24.3141	-30.9979	-39.5466	-15.9292	-27.6691	-39.1481	-16.6136		-5.15304	-16.8377	-10.5153	-6.27969
49.5		-21.4759	-28.3439	-35.1385	-13.2743	-20.5379	-45.2333	-16.0136		-7.90915	-18.8652	-13.3085	-11.8816
50.5		-24.3141	-32.5902	-47.733	-15.0442	-29.7066	-47.8412	-16.0136		-7.90373	-23.2176	-10.9986	-9.37307
51.5		-24.3141	-33.121	-43.3249	-14.1593	-26.6504	-22.6311	-16.0136		-1.77157	-21.6175	-10.3486	-7.59531
52.5		-18.1646	-29.4055	-43.9547	-15.0442	-23.5941	-52.1878	-14.2139		-3.58152	-15.8986	-12.3353	-10.4285
53.5		-23.1315	-33.121	-45.2141	-16.3717	-29.7066	-42.6253	-18.4133		-3.55551	-19.8253	-9.68854	-9.62108
54.5		-21.4759	-25.69	-31.9899	-14.1593	-24.6129	-35.6708	-16.0136		-5.38164	-17.7845	-10.8596	-8.28398
55.5		-24.3141	-30.9979	-40.1763	-16.8142	-29.7066	-39.1481	-16.6136		-5.18714	-21.3472	-12.1921	-13.1515
56.5		-24.3141	-30.9979	-38.9169	-15.9292	-22.5754	-41.756	-17.8134		-0.900678	-18.0531	-11.232	-10.7495
57.5		-21.9489	-28.3439	-37.0277	-13.2743	-21.5566	-23.5004	-17.2135		-5.70975	-17.7706	-11.644	-10.7398
58.5		-24.3141	-33.6518	-43.9547	-14.1593	-30.7253	-41.756	-16.0136		-7.79197	-21.6613	-10.1932	-9.86769
59.5		-21.9489	-30.4671	-37.3426	-16.3717	-28.6879	-45.1246	-16.9135		-2.94621	-16.4191	-10.5719	-7.74444
60.5		-25.7332	-35.7749	-40.1763	-13.2743	-33.7816	-33.0629	-18.4133		-8.30962	-24.2184	-12.6128	-9.21774
61.5		-24.7871	-30.9979	-42.6952	-16.8142	-29.7066	-42.6253	-19.0132		-0.863286	-17.5342	-10.8805	-7.2602
62.5		-21.9489	-28.3439	-39.5466	-12.3894	-20.5379	-38.2788	-16.0136		-7.13479	-17.937	-11.2439	-9.25052
63.5		-27.1523	-32.5902	-50.8816	-15.9292	-30.7253	-33.9322	-18.4133		-6.90237	-18.1677	-9.78719	-6.25547
64.5		-24.3141	-32.0594	-43.3249	-15.9292	-26.6504	-37.4094	-19.0132		-4.24248	-20.086	-7.71008	-8.7433
65.5		-21.9489	-29.4055	-37.6574	-12.3894	-28.6879	-29.4407	-16.0136		-6.01016	-21.3574	-13.5969	-9.19569
66.5		-21.9489	-31.5287	-33.2494	-16.8142	-25.6316	-18.2846	-17.2135		-1.55066	-15.2715	-8.54607	-6.27171
67.5		-21.0028	-29.9363	-34.5088	-13.2743	-26.6504	-49.5798	-17.8134		-2.28009	-15.0371	-10.9755	-9.20827
68.5		-24.7871	-34.1826	-47.1033	-12.3894	-33.7816	-30.4549	-16.6136		-5.47097	-19.9668	-12.858	-8.85762
69.5		-24.3141	-32.5902	-42.0655	-17.6991	-29.7066	-49.2901	-19.6131		-0.744579	-20.9602	-10.3348	-10.0066
70.5		-19.1107	-25.69	-39.5466	-10.6195	-23.5941	-33.9322	-17.2135		-5.01701	-20.158	-9.70631	-11.2708
71.5		-22.895	-30.9979	-43.6398	-16.8142	-26.141	-42.1907	-19.0132		-3.54489	-14.8197	-10.6507	-9.23672
72.5		-20.0568	-29.4055	-30.7305	-9.73451	-16.4629	-20.8925	-16.0136		-4.13296	-17.3201	-14.825	-10.1533
73.5		-25.7332	-30.4671	-40.806	-14.1593	-28.6879	-40.8867	-17.8134		-5.92084	-18.1082	-14.0617	-7.69703
74.5		-25.7332	-32.0594	-37.0277	-14.1593	-25.6316	-20.8925	-16.0136		-0.741525	-15.4717	-11.6375	-8.1571
75.5		-21.4759	-25.69	-31.3602	-15.9292	-20.5379	-25.2391	-18.4133		-5.34092	-16.6346	-12.88	-10.9325
76.5		-26.6793	-33.121	-42.0655	-15.0442	-28.6879	-46.9719	-19.6131		-4.69197	-19.243	-15.1501	-8.9032
77.5		-23.368	-28.3439	-37.3426	-13.2743	-25.6316	-39.7276	-18.7132		-2.45833	-17.1385	-11.8707	-8.40021
78.5		-24.3141	-33.121	-42.0655	-14.1593	-33.7816	-40.0174	-17.8134		-4.75077	-19.1264	-13.1934	-8.0291
79.5		-23.368	-29.9363	-38.2872	-15.0442	-30.7253	-8.72211	-22.0127		-1.2852	-15.8064	-11.2418	-8.00197
80.5		-19.5837	-25.1592	-32.6196	-12.3894	-26.6504	-13.0687	-16.6136		-3.63414	-17.7759	-12.8841	-10.3473
81.5		-24.3141	-31.5287	-42.0655	-11.5044	-31.7441	-45.2333	-22.0127		-4.9127	-15.7744	-13.5094	-10.3951
82.5		-22.895	-25.9554	-31.9899	-15.0442	-20.0285	-33.9322	-18.1133		-3.48998	-15.7016	-11.9664	-9.63698
83.5		-24.3141	-29.9363	-34.5088	-15.0442	-28.6879	-48.7105	-19.0132		-4.8301	-18.9542	-11.4718	-8.32673
84.5		-21.9489	-26.2208	-33.8791	-15.0442	-26.6504	-44.364	-18.4133		1.40461	-15.542	-9.84823	-9.18629
85.5		-17.2185	-23.5669	-30.7305	-13.2743	-27.6691	-49.2901	-19.0132		-2.50307	-20.7944	-15.0935	-8.13436
86.5		-21.4759	-30.4671	-38.2872	-15.0442	-24.6129	-46.1026	-19.6131		-3.88961	-5.90611	-15.2319	-10.5822
87.5		-21.0028	-29.9363	-35.7683	-15.0442	-28.6879	-21.7618	-22.0127		-1.70591	-18.5166	-11.7479	-9.36461
88.5		-20.5298	-26.2208	-37.0277	-15.9292	-27.6691	-30.4549	-21.1128		-3.6414	-16.0271	-13.1536	-9.64126
89.5		-21.4759	-25.69	-37.6574	-15.0442	-23.5941	-52.1878	-22.0127		-1.252	-18.8726	-9.6286	-7.68372
90.5		-18.6377	-23.5669	-30.1008	-14.1593	-26.6504	-8.72211	-20.213		-1.79769	-12.6012	-12.1955	-6.40899
91.5		-23.8411	-18.259	-27.5819	-14.1593	-26.6504	-21.7618	-19.0132		-6.40477	-13.0887	-11.7521	-8.63001
92.5		-21.0028	-14.5435	-22.5441	-13.2743	-26.6504	-41.3214	-20.8129		-0.290205	-10.3327	-12.319	-6.93946
93.5		-13.9073	-9.76645	-21.2846	-11.5044	-16.4629	-17.4152	-19.0132		1.86408	-10.5176	-9.60394	-5.9248
94.5		-7.75781	-7.64331	-15.3023	-7.9646	-10.3504	-11.656	-15.4137		4.58288	-11.5685	-8.16292	-4.03692
95.5		-3.02744	-7.64331	-13.0982	-8.84956	-7.29421	-4.37554	-10.0146		1.75113	-5.98484	-5.42875	-1.7268
96.5		-1.13529	-6.05096	-11.2091	-6.19469	-5.25672	-3.50623	-11.2144		3.79515	-10.9468	-3.07449	-2.39512
97.5		-0.662252	-7.11253	-9.94962	-4.42478	-7.29421	1.70965	-10.0146		3.73971	-6.95829	-4.90166	-1.7809
98.5		-1.13529	-6.58174	-11.2091	-7.9646	-5.25672	-1.7676	-9.41472		4.519	-10.1475	-1.26332	0.0446992
99.5		1.70293	-5.52017	-11.2091	-3.53982	-7.29421	2.57896	-8.21492		4.52256	-9.79698	-3.61967	1.2244
100.5		1.70293	-5.52017	-9.3199	-4.42478	-7.29421	4.31759	-6.71516		4.15957	-4.35076	-2.74729	1.95249
101.5		3.12204	-4.4586	-12.4685	-2.65487	-6.27547	6.92553	-7.01511		6.3114	-5.59292	-3.83539	3.83641
102.5		2.17597	-3.39703	-9.94962	-5.30973	-3.21923	5.1869	-6.41521		5.43546	-6.35212	0.398825	4.12955
103.5		2.64901	-3.39703	-11.2091	-6.19469	0.855746	6.92553	-4.0156		5.28437	-1.97482	-1.57557	-2.27256
104.5		3.12204	-2.86624	-10.5793	-6.19469	0.855746	13.88	-4.0156		6.83984	0.249373	1.26437	2.11461
105.5		1.70293	-1.80467	-7.43073	-4.42478	4.93073	16.488	-3.41569		6.77933	-2.9107	3.4163	3.09692
106.5		5.01419	-2.07006	-6.80101	-3.9823	6.45884	16.9226	-1.61599		8.66793	-2.7255	1.27239	3.03389
107.5		5.01419	-2.33546	-5.54156	-3.53982	6.96822	16.488	-4.0156		8.28195	-3.33972	2.00575	4.10591
108.5		5.48723	-3.39703	-6.80101	-1.76991	5.94947	21.7039	-1.61599		10.8856	-3.34268	5.07431	4.13545
109.5		5.01419	-1.80467	-6.17128	0	7.98696	22.5732	-2.81579		6.29762	-0.975255	5.84302	3.95854
110.5		5.48723	-0.212314	-4.91184	-1.76991	16.1369	17.3573	-3.41569		9.4235	-6.97981	4.42702	3.62559
111.5		5.01419	0.849257	-4.28212	-2.65487	10.0244	21.7039	-1.01608		7.79845	-4.37067	3.93854	5.89391
112.5		6.66982	0.0530786	-3.02267	-3.09735	16.6463	20.8345	1.98343		10.3793	-2.71884	6.51884	9.52283
113.5		6.4333	1.38004	-2.39295	-2.65487	15.1182	19.9652	1.98343		10.5139	-0.916927	6.32027	7.90438
114.5		8.79849	0.849257	-2.39295	0	18.1744	26.0504	-0.416182		10.6419	4.81975	6.75551	6.17083
115.5		8.79849	1.91083	1.38539	-1.76991	18.1744	20.8345	1.98343		11.9685	6.87898	6.19668	6.61157
116.5		8.79849	5.62633	-0.503778	-2.65487	18.1744	21.7039	0.783623		8.61766	-1.21474	5.51887	10.9049
117.5		12.1097	1.91083	0.755668	-4.42478	19.1932	26.9197	1.98343		10.7676	3.731	5.54767	11.6324
118.5		13.5289	4.03397	2.32997	-2.21239	22.2494	27.789	1.98343		9.42953	4.51228	8.83147	10.0964
119.5		13.5289	7.21868	4.53401	1.76991	22.2494	33.8742	1.98343		11.6383	11.9579	5.7805	10.4442
120.5		13.5289	6.6879	5.79345	1.76991	29.3806	30.397	1.98343		10.6812	6.56391	6.39783	13.0926
121.5		13.5289	6.6879	5.79345	1.76991	27.3431	27.789	1.98343		7.3064	2.18899	10.2818	11.0315
122.5		13.5289	6.15711	5.79345	0.884956	28.3619	29.5277	1.98343		12.3813	2.69909	8.18682	12.426
123.5		14.948	7.74947	7.0529	0.884956	26.3244	32.1356	1.98343		8.52208	7.36617	7.79089	13.0811
124.5		15.894	7.74947	7.0529	0.442478	27.3431	27.789	2.58333		9.61756	7.81893	8.43724	13.6619
125.5		16.8401	6.6879	5.79345	0.884956	30.3993	28.6584	4.98294		9.90019	8.03835	10.739	13.8649
126.5		16.8401	8.81104	10.2015	1.76991	27.3431	32.1356	4.38304		9.67233	3.70184	10.0822	14.5135
127.5		16.8401	9.87261	7.68262	0.884956	29.3806	38.2208	3.78314		9.6752	1.32883	9.2312	13.2658
128.5		16.3671	8.81104	9.57179	1.76991	25.3056	30.397	3.78314		6.59299	8.42404	8.30978	13.247
129.5		16.8401	7.74947	9.57179	0.884956	28.3619	26.0504	6.18275		6.3774	4.64981	8.79168	12.8418
130.5		15.1845	9.60722	10.8312	2.21239	30.9087	25.6158	2.35837		6.97945	4.96128	7.55696	14.0394
131.5		16.3671	9.34183	12.0907	1.76991	25.3056	28.6584	4.98294		5.50026	6.74442	9.96172	12.3527
132.5		15.421	9.34183	9.57179	0	26.3244	31.2663	4.38304		6.95454	2.80011	9.65691	13.656
133.5		14.0019	8.81104	10.2015	0	22.2494	33.0049	7.38255		7.72219	8.69188	6.51456	12.8398
134.5		15.894	9.34183	12.7204	2.65487	26.3244	21.7039	2.58333		6.62942	9.68374	8.80216	14.3716
135.5		15.421	8.81104	10.8312	1.76991	31.4181	27.789	7.98245		7.15851	5.45861	7.3883	15.4641
136.5		17.7862	9.60722	9.88665	1.32743	26.3244	33.8742	5.58284		6.06901	3.99733	6.70417	12.2151
137.5		17.3132	11.465	10.2015	2.65487	28.3619	26.0504	7.38255		6.98561	6.87117	8.97183	9.51472
138.5		15.421	14.1189	9.57179	1.76991	25.3056	29.5277	5.58284		3.23144	6.35029	6.24731	13.9631
139.5		15.421	10.4034	13.3501	2.65487	26.3244	21.7039	6.78265		3.15291	2.09007	8.17183	13.3254
140.5		14.948	11.465	11.461	3.53982	23.2681	30.397	6.78265		3.43699	1.61644	9.37942	15.8192
141.5		13.5289	9.34183	13.3501	2.65487	28.3619	29.5277	7.98245		4.0469	6.56705	7.49724	15.0424
142.5		14.4749	10.6688	10.5164	3.53982	28.8712	27.789	7.98245		4.60629	4.27629	8.13483	12.7406
143.5		13.0558	14.1189	12.7204	0.884956	30.3993	30.397	7.98245		2.4241	0.795856	9.49598	11.0245
144.5		13.0558	14.1189	13.9798	1.76991	28.3619	30.397	6.18275		2.4241	8.09891	9.0154	15.1728
145.5		13.5289	11.465	13.9798	3.53982	21.2306	31.2663	7.98245		4.16846	-2.71895	6.5035	14.1307
146.5		14.0019	9.87261	15.869	3.53982	22.2494	28.6584	4.98294		1.28443	8.34818	9.60337	12.8938
147.5		13.5289	12.5265	13.9798	4.42478	23.2681	31.2663	6.78265		3.89314	5.79886	6.97345	13.9741
148.5		14.0019	11.7304	12.7204	3.09735	24.7963	26.0504	8.88231		1.928	9.08712	6.24961	12.0996
149.5		14.0019	10.9342	11.461	2.65487	29.3806	26.9197	10.982		2.30586	4.55346	9.57639	12.1962
150.5		15.421	9.87261	11.461	2.65487	26.3244	33.0049	10.3821		3.75339	6.00128	9.90676	13.513
151.5		14.4749	11.465	12.0907	5.30973	26.3244	31.2663	8.58236		3.51613	7.16179	7.41904	11.6141
152.5		13.5289	11.465	13.3501	2.65487	29.3806	29.5277	7.38255		2.65679	5.11444	6.95577	10.3202
153.5		14.0019	11.9958	16.4987	2.65487	23.2681	27.789	7.98245		2.38529	2.80033	9.71868	13.2535
154.5		13.0558	11.9958	13.3501	1.32743	27.3431	23.0078	9.48221		2.53737	4.84386	8.03966	11.9452
155.5		13.0558	13.5881	15.2393	3.53982	27.3431	22.5732	7.98245		3.91801	6.89168	8.80424	13.518
156.5		12.5828	11.9958	13.9798	2.65487	25.3056	29.5277	9.18226		2.64531	7.45911	9.30001	16.0264
157.5		14.948	12.5265	13.3501	2.65487	26.3244	22.5732	10.982		2.14256	3.85121	7.07357	12.9695
158.5		13.5289	11.465	12.7204	4.42478	20.2119	25.1811	9.18226		1.49956	6.49696	7.91421	7.22831
159.5		13.2923	13.0573	14.9244	2.65487	23.7775	27.3544	9.48221		0.613638	9.82766	8.06797	11.2124
160.5		14.4749	13.0573	14.6096	4.42478	25.3056	26.0504	10.982		-0.524293	3.413	7.92349	15.4486
161.5		12.1097	13.5881	13.9798	0	27.3431	26.9197	7.98245		-0.380804	5.42897	6.31815	10.2779
162.5		11.1637	11.465	14.6096	4.42478	26.3244	27.789	9.78216		4.61685	12.5879	6.23739	13.2884
163.5		13.5289	11.9958	12.7204	-1.76991	27.3431	26.9197	8.58236		2.31572	4.57257	7.79544	10.8809
164.5		14.0019	13.0573	15.2393	4.42478	26.3244	26.0504	9.18226		2.39405	8.79522	5.07586	12.9534
165.5		13.5289	13.5881	16.4987	5.30973	26.8337	26.4851	8.2824		3.41988	5.57303	6.7075	11.7229
166.5		14.4749	12.5265	15.869	-0.884956	29.3806	26.0504	9.78216		4.83733	6.36568	6.98745	13.4965
167.5		17.3132	13.0573	14.6096	3.53982	24.2869	26.0504	7.98245		3.77117	10.394	4.95611	12.694
168.5		18.2592	11.9958	12.7204	3.53982	27.3431	33.8742	10.982		4.13758	6.65304	5.5952	12.6997
169.5		17.7862	11.9958	12.0907	5.30973	29.3806	37.3515	9.78216		3.593	5.9907	7.96563	11.2656
170.5		18.2592	14.6497	14.6096	5.30973	27.3431	41.6981	7.98245		4.32772	7.14939	6.59267	10.5423
171.5		17.5497	11.465	13.665	4.42478	23.2681	45.1753	11.2819		3.94521	6.80565	6.98181	12.0348
172.5		17.3132	11.465	13.9798	1.76991	24.2869	43.4367	10.3821		4.54365	5.32023	4.0898	13.5393
173.5		16.8401	13.0573	13.9798	4.42478	20.2119	44.306	9.78216		4.62684	12.6643	4.93679	10.1606
174.5		16.3671	13.5881	12.0907	1.76991	20.2119	43.4367	10.982		4.04086	7.36938	6.54745	7.11405
175.5		18.2592	11.465	12.0907	3.53982	21.2306	46.0446	10.3821		3.37367	11.4601	3.68623	10.4558
176.5		18.2592	10.4034	12.7204	0.884956	19.1932	44.306	7.98245		2.87104	5.63431	4.15138	9.69246
177.5		18.0227	10.6688	11.461	3.9823	18.6838	43.8713	12.1818		7.23438	9.54735	3.80911	10.2666
178.5		17.7862	13.0573	10.8312	0.884956	19.1932	38.2208	10.982		4.87593	2.34152	5.73667	13.2265
179.5		17.3132	11.9958	12.0907	4.42478	16.1369	33.0049	10.982		3.55155	0.0232675	3.9653	6.49985
180.5		17.3132	13.5881	12.0907	4.42478	15.1182	32.1356	8.58236		7.39388	4.55015	3.91862	9.83443
181.5		16.3671	14.1189	12.7204	1.76991	20.2119	35.6129	7.98245		4.65266	3.59025	4.11471	9.22683
182.5		14.948	11.9958	11.461	0	18.1744	34.7436	10.982		6.09009	6.2299	3.89126	13.298
183.5		16.6036	10.4034	12.4055	4.86726	20.2119	33.8742	9.48221		5.29059	6.24785	6.65952	9.79369
184.5		14.948	10.4034	12.7204	1.76991	25.3056	33.0049	10.982		5.91575	0.425557	8.29746	12.8413
185.5		15.894	13.0573	10.8312	-1.76991	27.3431	34.7436	10.3821		4.95887	7.86204	8.26329	8.7772
186.5		17.7862	9.34183	13.3501	0	23.2681	38.2208	11.5819		3.78359	4.61498	7.60734	9.81842
187.5		16.8401	12.5265	11.461	4.42478	22.2494	39.9594	9.78216		4.55615	-2.37368	9.06125	10.7915
188.5		14.948	11.465	8.94207	4.42478	25.3056	33.8742	10.3821		4.14566	3.12233	6.8139	11.254
189.5		14.2384	11.465	10.2015	5.75221	20.2119	33.0049	10.0821		3.68037	6.14455	3.64483	9.45322
190.5		13.5289	12.5265	11.461	5.30973	14.0994	35.6129	12.1818		2.48284	7.03332	2.59693	12.0421
191.5		10.6906	10.9342	10.8312	3.53982	15.1182	31.2663	13.9815		3.20506	8.56579	5.00106	7.51741
192.5		13.0558	9.34183	12.0907	1.76991	17.1557	27.789	9.78216		2.38027	6.53673	2.46583	9.56027
193.5		12.5828	9.87261	13.3501	5.30973	23.2681	31.2663	11.5819		2.53624	7.00788	3.70361	8.63614
194.5		13.0558	11.465	12.0907	0.884956	25.3056	26.0504	7.98245		2.82634	6.54955	3.30399	12.0212
195.5		13.2923	11.9958	11.7758	3.09735	23.7775	30.8316	10.3821		3.28444	3.82829	3.7049	9.00233
196.5		13.5289	11.9958	13.3501	6.19469	19.1932	27.789	9.78216		3.11491	4.67737	4.84977	7.15172
197.5		14.4749	9.87261	12.0907	-0.884956	22.2494	26.0504	7.98245		2.25982	4.3968	2.14389	6.01574
198.5		14.4749	12.5265	12.7204	2.65487	20.2119	27.789	10.3821		4.6378	6.3922	4.10101	8.65662
199.5		13.0558	12.5265	12.7204	1.76991	19.1932	23.4425	9.78216		2.74437	-0.5018	5.83208	9.68265
200.5		13.0558	13.0573	12.0907	-0.884956	17.1557	23.4425	9.18226		3.87381	2.39088	3.69011	6.68512
201.5		13.2923	13.0573	12.0907	2.21239	16.1369	26.0504	8.88231		4.31393	4.60005	2.88884	6.37532
202.5		12.5828	12.5265	12.0907	4.42478	13.0807	24.3118	9.18226		2.82861	9.03529	4.39118	5.01939
203.5		12.5828	13.5881	9.57179	3.53982	10.0244	16.488	7.98245		2.10477	5.38776	-0.0960528	5.97066
204.5		13.0558	13.0573	13.3501	4.42478	9.0057	21.7039	6.18275		1.59418	6.28664	4.01912	7.81933
205.5		12.5828	11.9958	13.3501	0.884956	7.98696	18.2266	10.982		2.65125	4.95507	1.35246	6.40345
206.5		11.1637	14.6497	13.3501	2.65487	11.0432	19.0959	7.98245		1.64923	5.70218	2.39843	5.30818
207.5		10.4541	11.7304	13.0353	1.32743	7.98696	20.3999	9.48221		0.277834	3.9191	0.441867	5.47812
208.5		9.74456	11.9958	13.3501	4.42478	7.98696	18.2266	7.98245		0.782443	9.46739	0.208178	7.49517
209.5		12.5828	12.5265	13.9798	1.76991	11.0432	17.3573	10.3821		1.20759	1.39647	3.61634	8.0877
210.5		13.0558	14.1189	12.7204	4.42478	4.93073	19.0959	7.98245		0.845896	8.22071	1.52421	4.77825
211.5		10.2176	15.7113	12.0907	6.19469	3.91198	16.488	7.98245		-0.0724293	5.34476	3.05736	7.74884
212.5		10.2176	14.6497	13.9798	4.42478	10.0244	12.1414	9.18226		0.627748	6.6777	-0.500067	3.78944
213.5		11.4002	13.5881	12.7204	5.30973	10.5338	13.88	8.2824		0.462815	5.09399	3.10851	3.80224
214.5		11.1637	14.1189	12.7204	9.73451	20.2119	16.488	7.98245		0.559654	5.4781	2.20868	7.05662
215.5		11.6367	13.0573	13.3501	1.76991	16.1369	13.88	7.98245		0.453254	6.64623	-0.909158	5.07637
216.5		11.6367	14.1189	12.0907	2.65487	11.0432	16.488	9.78216		1.8169	4.85014	-1.16273	7.55544
217.5		12.1097	12.5265	12.0907	0.884956	9.0057	13.88	7.98245		-0.856239	8.77863	1.73402	3.89456
218.5		11.6367	12.5265	12.0907	-0.884956	6.96822	14.7493	7.98245		1.93598	8.72323	3.77579	5.80089
219.5		10.2176	12.2611	11.7758	4.42478	9.51508	20.3999	9.18226		-0.958606	3.20736	4.49252	5.45418
220.5		11.6367	11.9958	12.7204	2.65487	13.0807	19.0959	9.18226		-0.502651	8.87741	2.47059	6.07691
221.5		13.5289	12.5265	10.8312	4.42478	20.2119	25.1811	6.18275		2.14849	9.46287	4.14037	8.57927
222.5		17.3132	11.9958	10.8312	6.19469	16.1369	16.488	10.982		3.06173	3.0477	6.7035	5.88954
223.5		14.0019	12.5265	10.8312	6.19469	18.1744	23.4425	10.3821		0.599032	3.40706	6.95591	6.73403
224.5		14.4749	11.9958	10.8312	4.42478	15.1182	22.5732	7.98245		1.44544	8.55013	6.03711	4.38195
225.5		13.2923	11.1996	11.461	5.30973	15.6275	22.5732	9.18226		1.87721	1.79373	8.02673	7.73255
226.5		13.5289	10.9342	10.8312	6.19469	20.2119	22.5732	7.98245		2.54983	-2.16862	1.92031	8.27414
227.5		12.5828	11.9958	11.461	1.76991	19.1932	18.2266	7.98245		2.94064	7.51609	1.80242	5.43865
228.5		12.5828	9.87261	10.2015	5.30973	16.1369	16.488	7.98245		1.88361	14.4752	2.24346	6.26871
229.5		13.5289	11.465	8.31234	0.884956	15.1182	22.5732	7.98245		2.22339	1.76878	3.54454	8.89855
230.5		14.0019	10.4034	7.68262	5.30973	16.1369	18.2266	7.98245		1.89957	-0.310558	1.77804	5.91791
231.5		13.5289	11.465	10.2015	3.09735	11.5526	16.9226	7.98245		1.18778	2.57511	1.59341	3.37049
232.5		9.74456	10.4034	12.0907	2.65487	9.0057	9.53347	7.98245		0.719276	7.73114	2.65426	5.37862
233.5		10.2176	10.9342	11.461	2.65487	7.98696	13.0107	7.98245		0.0332282	6.33447	1.6294	3.12974
234.5		10.2176	11.465	10.8312	5.30973	9.0057	13.0107	7.98245		0.466899	1.86468	0.807499	2.53315
235.5		12.5828	10.9342	7.68262	4.42478	1.87449	15.6187	7.98245		1.24581	2.66437	-1.48761	3.83248
236.5		10.6906	10.4034	9.57179	3.53982	3.91198	10.4028	7.98245		-1.04262	8.13627	0.821702	5.39186
237.5		9.98108	10.9342	11.461	3.09735	10.5338	11.2721	7.98245		0.400463	-0.987944	1.3491	3.67078
238.5		11.6367	9.87261	10.8312	4.42478	9.0057	14.7493	6.78265		1.81159	1.88997	-0.0201618	4.56575
239.5		13.5289	10.4034	12.7204	-0.884956	7.98696	13.0107	7.98245		2.42563	-0.560989	-0.860955	0.708511
240.5		11.1637	11.465	11.461	1.76991	-0.162999	11.2721	5.58284		-0.139942	1.39473	-0.221767	4.19702
241.5		9.27152	13.0573	11.461	1.76991	6.96822	2.57896	7.38255		-0.272951	4.6416	0.536446	5.23868
242.5		10.6906	10.138	8.94207	4.86726	0.855746	10.4028	6.4827		1.4756	-0.969965	-0.115605	3.87001
243.5		9.74456	11.465	11.461	2.65487	5.94947	7.79484	6.18275		0.0282421	4.16858	-1.20134	2.1414
244.5		10.6906	12.5265	10.2015	3.53982	-1.18174	6.92553	6.18275		-2.03723	3.14151	-2.1972	2.66006
245.5		11.1637	10.4034	8.94207	1.76991	3.91198	11.2721	7.98245		0.161626	-0.362836	-0.0464797	4.60035
246.5		11.1637	13.0573	10.8312	6.19469	4.93073	7.79484	7.98245		-1.07965	6.17926	0.89999	3.28758
247.5		11.1637	9.87261	11.461	1.76991	5.94947	11.2721	6.78265		1.74792	-4.11398	-2.05807	-0.591468
248.5		11.8732	11.1996	11.1461	4.86726	7.47759	14.3147	6.18275		1.40479	1.45793	2.40307	5.0266
249.5		10.2176	12.5265	10.2015	2.65487	6.96822	13.0107	7.98245		0.217585	2.37404	4.01431	5.50831
250.5		9.74456	11.465	12.0907	2.65487	7.98696	14.7493	5.58284		-2.20942	2.35899	-0.287473	4.94768
251.5		7.85241	13.0573	12.7204	3.53982	5.94947	13.88	6.78265		1.07203	4.2839	1.91549	3.88947
252.5		6.90634	12.5265	13.9798	1.76991	17.1557	19.0959	5.58284		-2.06533	-0.180021	3.33361	5.36713
253.5		7.85241	14.1189	13.9798	2.65487	13.0807	16.488	7.98245		-1.21643	1.00972	1.6191	3.35296
254.5		7.85241	12.5265	12.4055	1.76991	14.0994	17.7919	6.78265		0.219643	4.85449	2.5893	4.26024
255.5		10.2176	11.9958	13.3501	1.76991	7.98696	18.2266	7.98245		0.769813	3.38772	0.950044	5.4004
256.5		9.27152	14.6497	13.3501	3.53982	10.0244	19.0959	6.78265		1.10349	5.08017	3.459	3.04339
257.5		10.2176	13.5881	13.3501	1.76991	9.0057	13.88	7.98245		0.439273	2.11392	1.95322	2.47379
258.5		9.74456	11.9958	13.3501	2.65487	9.0057	9.53347	7.98245		2.06942	4.99021	1.02509	2.68113
259.5		10.2176	10.9342	12.0907	3.53982	10.0244	17.3573	7.98245		1.01283	-1.8306	3.90092	2.36305
260.5		10.4541	11.7304	11.7758	3.53982	15.6275	13.0107	7.98245		1.06373	1.63599	1.93718	2.14969
261.5		13.0558	12.5265	10.2015	2.65487	11.0432	15.6187	7.38255		0.0937263	4.49625	2.68743	6.81331
262.5		11.6367	11.9958	10.8312	1.76991	15.1182	15.6187	5.58284		-1.10767	4.68504	4.91375	2.3048
263.5		11.6367	11.465	12.0907	2.65487	16.1369	19.0959	7.98245		0.787712	8.25125	3.83327	3.46973
264.5		11.1637	11.465	10.8312	1.76991	16.1369	20.8345	6.78265		-0.523424	-0.847745	2.93555	5.52919
265.5		10.6906	9.34183	13.3501	1.76991	18.1744	19.0959	7.98245		-0.658396	4.70519	6.37679	6.77371
266.5		12.1097	11.9958	11.461	1.76991	16.6463	19.0959	7.38255		0.471446	5.5685	4.61398	2.8547
267.5		10.2176	11.9958	12.7204	2.65487	13.0807	14.7493	6.78265		0.0766515	3.94985	2.49937	4.03807
268.5		10.2176	14.6497	13.9798	1.76991	14.0994	16.488	7.98245		1.07675	1.24593	1.96221	3.81581
269.5		11.1637	15.1805	15.869	1.76991	11.0432	18.2266	6.78265		3.77197	2.66178	2.84304	5.79291
270.5		12.5828	13.5881	16.4987	0	10.0244	11.2721	5.58284		2.5085	2.13153	2.16453	5.45372
271.5		14.4749	13.0573	16.4987	4.42478	6.96822	15.6187	6.18275		4.24102	1.08914	2.35995	5.45959
272.5		14.4749	12.7919	15.2393	1.76991	10.0244	13.88	7.98245		1.66671	0.258191	2.52208	3.84271
273.5		11.6367	15.1805	14.6096	2.65487	7.98696	14.7493	7.98245		-0.10768	6.69685	3.71921	4.61169
274.5		12.5828	14.6497	17.1285	1.76991	10.0244	11.2721	7.38255		3.07589	0.999196	1.91934	2.38254
275.5		12.5828	14.1189	16.4987	1.76991	14.0994	15.6187	4.98294		2.2429	4.15963	2.71211	3.8074
276.5		12.1097	14.1189	13.9798	2.65487	16.1369	12.1414	6.18275		-0.440534	3.90185	1.32749	9.42728
277.5		10.2176	16.242	14.6096	2.65487	14.0994	20.8345	7.38255		-2.49536	4.11893	-0.128286	2.43765
278.5		9.035	14.3843	14.6096	3.53982	13.5901	14.7493	6.78265		0.197892	1.26367	1.7251	4.83286
279.5		9.74456	14.1189	13.3501	3.53982	11.0432	19.0959	4.98294		-1.12756	-0.606297	2.60322	5.5637
280.5		9.27152	17.3036	16.4987	1.76991	7.98696	12.1414	4.98294		0.870727	7.14345	-1.74037	4.62036
281.5		6.4333	14.6497	12.0907	0.884956	11.0432	17.3573	7.38255		-0.384462	0.416536	1.14212	7.01011
282.5		5.96026	15.1805	17.1285	0.884956	7.98696	14.7493	5.58284		-1.43205	2.90694	3.1825	3.58699
283.5		5.96026	13.5881	13.3501	0.884956	10.0244	16.488	4.98294		-2.22931	5.76286	3.35874	4.55355
284.5		5.96026	15.4459	13.3501	3.09735	8.49633	17.3573	7.98245		-1.51968	3.8113	2.76375	3.53632
285.5		5.48723	16.7728	17.1285	1.76991	12.0619	16.488	6.78265		-2.62842	6.48763	3.37001	3.83418
286.5		6.4333	16.7728	17.1285	2.65487	14.0994	15.6187	7.98245		-2.40116	8.02565	3.61307	5.65565
287.5		6.4333	16.7728	17.1285	3.53982	7.98696	17.3573	4.98294		-2.0203	7.42389	2.82434	5.96766
288.5		5.01419	14.6497	15.869	2.65487	6.96822	12.1414	4.98294		-2.40491	1.51433	-1.85499	6.54729
289.5		5.01419	16.7728	13.9798	1.76991	10.0244	16.488	4.98294		-3.68303	9.20004	2.75984	6.23833
290.5		2.41249	14.3843	14.9244	1.76991	15.1182	19.0959	4.98294		-3.61689	0.740165	2.9535	5.28301
291.5		3.12204	14.6497	14.6096	1.76991	16.1369	22.5732	6.18275		-3.88226	0.686602	4.15617	4.10698
292.5		3.12204	13.5881	13.9798	4.42478	19.1932	16.488	4.98294		-2.2847	3.85133	2.56658	2.62187
293.5		4.54115	15.7113	13.9798	1.76991	15.1182	18.2266	4.98294		-2.90544	3.83694	1.57645	4.56259
294.5		5.96026	14.1189	17.1285	5.30973	12.0619	14.7493	7.98245		-3.0955	-1.63892	1.06809	4.09944
295.5		6.4333	14.1189	15.2393	2.65487	16.1369	20.8345	4.98294		-1.15249	6.66228	4.16885	4.47804
296.5		7.37938	15.1805	14.6096	0.884956	11.5526	16.9226	4.08309		0.518795	8.11255	3.07295	2.54632
297.5		8.32545	13.5881	13.9798	-0.884956	10.0244	13.88	4.98294		-1.59282	2.93041	-0.882932	5.62214
298.5		9.27152	14.1189	13.3501	1.76991	12.0619	12.1414	7.98245		-0.363723	4.99649	2.22905	6.56135
299.5		12.5828	12.5265	14.6096	1.76991	16.1369	16.488	1.98343		0.709029	3.53927	1.76226	3.93519
300.5		13.0558	11.9958	14.6096	5.30973	11.0432	15.6187	4.98294		2.26112	1.01355	4.0819	5.48089
301.5		14.948	12.5265	14.6096	2.65487	18.1744	16.488	4.98294		1.11206	3.38386	5.30296	4.16689
302.5		15.421	13.5881	13.3501	1.76991	15.1182	20.3999	3.48318		0.493763	1.00024	2.31745	6.31631
303.5		15.894	14.6497	15.2393	0	13.0807	14.7493	6.18275		0.442868	1.67687	6.82762	6.57066
304.5		14.948	13.5881	13.3501	0	19.1932	22.5732	4.98294		1.50014	2.50145	4.87795	2.79283
305.5		15.421	13.5881	15.869	2.65487	21.2306	22.5732	4.98294		0.264938	3.28739	6.27098	6.70319
306.5		14.948	14.1189	12.7204	1.76991	22.2494	23.4425	4.98294		0.946943	1.65248	5.73066	7.78413
307.5		14.948	11.465	14.6096	0.884956	20.2119	29.5277	4.98294		1.61533	-0.243951	5.54592	8.01192
308.5		14.7114	11.465	12.0907	2.21239	18.6838	28.2237	4.68299		2.55945	4.63493	5.0958	5.05383
309.5		14.0019	11.9958	11.461	2.65487	16.1369	33.0049	6.78265		2.48695	1.78439	5.07115	3.92538
310.5		14.4749	14.1189	12.7204	2.65487	14.0994	36.4822	4.98294		5.44194	5.35406	1.50979	6.05582
311.5		13.5289	11.465	13.3501	4.42478	13.0807	47.7833	4.98294		2.50125	3.20789	7.62063	3.78419
312.5		14.948	10.9342	14.6096	1.76991	5.94947	39.9594	3.78314		0.76612	0.859392	1.98253	4.56676
313.5		14.0019	9.87261	13.3501	2.65487	9.0057	40.8287	1.98343		2.85654	-1.62619	2.80533	6.02829
314.5		12.1097	9.87261	13.3501	2.21239	9.51508	39.5248	3.48318		1.81082	4.63016	3.56016	6.38408
315.5		13.5289	11.9958	13.3501	1.76991	10.0244	42.5674	4.98294		2.58247	-1.74524	3.01819	5.25486
316.5		13.0558	10.4034	13.9798	1.76991	7.98696	36.4822	2.58333		5.13785	0.81558	1.75896	4.53008
317.5		13.5289	9.34183	12.7204	2.65487	14.0994	31.2663	3.78314		2.88788	4.65514	4.28732	4.55676
318.5		12.1097	10.9342	12.0907	3.53982	16.1369	34.7436	3.78314		-0.340269	-6.33136	1.44923	3.90057
319.5		12.5828	11.465	11.7758	3.09735	11.5526	28.2237	3.48318		3.10951	2.67322	0.983559	1.24389
320.5		11.6367	11.465	13.3501	2.65487	9.0057	27.789	1.98343		-0.920046	-5.54387	4.36951	4.85421
321.5		13.5289	11.465	11.461	1.76991	13.0807	29.5277	1.98343		-0.328978	-3.02395	2.35193	5.58
322.5		12.1097	11.9958	11.461	3.53982	16.1369	30.397	3.18323		2.8077	1.75835	6.25619	5.19717
323.5		11.6367	14.1189	10.8312	1.76991	14.0994	26.9197	3.18323		3.23183	4.63744	2.32641	2.46021
324.5		12.5828	10.4034	12.0907	3.53982	17.1557	30.397	1.98343		1.2628	-7.31738	5.25855	5.49339
325.5		11.6367	13.5881	11.7758	2.65487	14.0994	29.5277	1.98343		2.85562	2.51153	4.76961	5.48867
326.5		10.6906	11.9958	11.461	3.53982	10.0244	20.8345	1.98343		0.741971	-4.18538	6.79272	5.63309
327.5		9.74456	12.5265	10.8312	2.65487	7.98696	26.9197	1.98343		1.51467	0.340105	3.09252	2.26556
328.5		9.74456	13.5881	12.0907	2.65487	13.0807	26.9197	1.98343		0.226963	1.57359	3.51531	7.4375
329.5		9.74456	10.9342	12.7204	1.76991	12.0619	30.397	1.98343		0.728016	1.11149	2.55337	4.73756
330.5		8.79849	13.0573	11.461	2.65487	2.89324	26.9197	1.98343		1.98321	2.76145	2.8143	4.81516
331.5		9.50804	11.9958	12.0907	2.65487	6.45884	24.3118	2.58333		0.255691	-1.55258	2.50942	4.20521
332.5		8.79849	14.6497	13.3501	1.76991	3.91198	23.4425	1.98343		1.23962	-1.98605	3.08704	4.10693
333.5		8.79849	11.465	13.3501	1.76991	6.96822	22.5732	2.58333		0.928136	-3.11575	-2.27758	4.9335
334.5		9.74456	15.1805	11.461	1.76991	2.89324	22.5732	1.98343		-0.785709	2.341	0.0698642	3.829
335.5		10.2176	14.6497	12.0907	2.65487	2.89324	21.7039	1.98343		2.28975	1.33771	-0.617047	6.45168
336.5		10.6906	11.465	14.6096	1.76991	7.98696	18.2266	3.18323		-0.594393	-3.25746	0.43156	6.45866
337.5		7.61589	13.3227	13.665	0.442478	3.91198	19.5306	3.48318		-0.206303	-3.45591	1.00212	2.1255
338.5		7.85241	8.81104	10.2015	0.884956	7.98696	19.0959	1.98343		0.10436	0.794775	2.80771	1.94052
339.5		10.6906	9.87261	12.0907	1.76991	4.93073	19.9652	1.98343		-1.11395	0.619408	0.471549	2.26605
340.5		11.1637	8.81104	10.8312	0	9.0057	22.5732	1.38353		0.161732	-3.8259	2.92307	1.38842
341.5		11.1637	10.9342	12.0907	4.42478	3.91198	15.6187	1.38353		-0.322142	1.85391	0.434286	2.57444
342.5		9.74456	14.6497	11.461	1.76991	10.0244	16.488	0.783623		-0.0266415	2.4268	2.80192	4.07825
343.5		11.6367	13.3227	12.4055	-0.442478	6.45884	14.7493	2.58333		2.1373	0.206728	-0.854457	5.45605
344.5		11.1637	14.1189	11.461	3.53982	7.98696	21.7039	1.98343		0.134761	3.22877	1.1203	6.89989
345.5		10.2176	13.5881	8.94207	0.884956	2.89324	16.488	1.98343		-1.14438	1.58981	-2.47376	1.58809
346.5		11.6367	15.7113	12.7204	2.65487	11.0432	13.0107	1.98343		-0.763807	-2.27716	3.28138	3.95952
347.5		11.1637	14.1189	13.9798	3.53982	12.0619	13.0107	1.98343		-1.50948	-0.306585	-0.465129	1.92404
348.5		10.2176	12.5265	12.0907	2.65487	4.93073	14.7493	1.98343		-0.404462	0.146617	1.82271	4.25708
349.5		10.9272	14.6497	12.7204	3.09735	2.89324	12.1414	1.68348		-1.36261	1.72434	0.649484	3.30356
350.5		9.74456	13.5881	11.461	0.884956	-1.18174	4.31759	3.18323		1.03771	4.51478	-0.396713	2.97132
351.5		10.2176	13.5881	12.7204	0.884956	-0.162999	3.44828	1.98343		0.465165	0.395144	0.803503	3.13
352.5		8.79849	11.465	10.8312	3.53982	-1.18174	6.92553	1.98343		0.840346	6.06214	-2.03279	1.41415
353.5		10.2176	10.4034	10.8312	2.65487	-0.162999	9.53347	0.783623		-0.785677	-0.948652	-0.922128	1.69448
354.5		7.37938	9.87261	8.31234	1.76991	0.855746	4.31759	3.18323		1.78594	5.90187	1.46396	3.81923
355.5		7.14286	11.1996	9.57179	-0.442478	7.98696	11.2721	1.38353		0.2229	-2.58801	0.417064	2.55962
356.5		7.85241	9.87261	8.94207	2.65487	7.98696	12.1414	3.18323		-0.960102	5.39611	0.884866	3.05185
357.5		6.90634	8.81104	8.94207	2.65487	5.94947	9.53347	1.98343		-0.164801	-5.79774	-0.107889	3.4752
358.5		6.4333	7.74947	8.94207	1.76991	2.89324	13.88	3.18323		-0.923737	-7.61093	-1.77697	2.9307
359.5		5.48723	10.9342	7.68262	2.65487	6.96822	8.66416	1.38353		-0.363723	1.34095	1.78168	3.48588
360.5		8.32545	9.34183	7.0529	2.65487	5.94947	7.79484	0.783623		-1.2469	-2.01498	-0.937659	3.223
361.5		9.50804	9.34183	7.68262	0.884956	1.36512	7.79484	0.483671		0.493414	-4.00138	0.619453	0.876513
362.5		10.2176	8.81104	11.461	2.65487	-4.23798	3.44828	-0.416182		-0.0453943	-8.14786	0.189269	1.5639
363.5		7.37938	10.9342	7.68262	0.884956	10.0244	6.05622	1.98343		-0.160986	-0.8544	-0.678826	1.85812
364.5		9.74456	9.34183	9.57179	2.65487	5.94947	12.1414	1.98343		2.3547	-1.7964	-3.23064	3.24759
365.5		8.32545	8.81104	10.2015	4.42478	-0.162999	10.4028	-1.01608		1.33588	-0.599713	-1.43731	1.86621
366.5		8.32545	8.28025	9.57179	0	0.855746	7.79484	1.38353		2.88389	-7.52771	-1.31251	-0.350721
367.5		7.85241	10.138	9.57179	1.76991	-2.70986	1.70965	0.18372		0.424845	-2.09603	-1.91184	0.219128
368.5		6.4333	9.87261	12.0907	-0.884956	-8.31296	2.57896	0.18372		-1.3695	-2.06032	-1.24531	1.02428
369.5		5.96026	10.4034	11.461	0.884956	-4.23798	-0.89829	-1.01608		-1.65749	-3.83721	-2.21461	2.56125
370.5		3.12204	13.0573	12.7204	0	-9.3317	1.70965	-1.01608		-1.58424	-0.264622	0.066144	2.81178
371.5		4.06812	14.1189	12.0907	0.884956	-2.20049	-0.89829	1.98343		-2.87785	2.32428	-3.48513	0.424645
372.5		2.64901	14.6497	12.0907	1.76991	-10.3504	6.05622	3.18323		-1.37688	-9.75657	-0.0449309	-0.461808
373.5		1.93945	13.8535	13.665	3.09735	-6.78484	-0.0289771	-0.416182		-1.89704	1.27897	-1.18401	1.29552
374.5		3.59508	14.1189	12.0907	2.65487	-0.162999	-0.89829	0.783623		-2.29964	5.55065	-2.64669	4.98281
375.5		2.17597	14.1189	12.7204	2.65487	-3.21923	6.05622	-1.01608		-1.69865	1.55922	-2.21331	0.254465
376.5		4.06812	13.5881	13.3501	0	-8.31296	4.31759	-1.01608		-0.35462	-1.42251	-0.13278	0.0448596
377.5		5.48723	13.0573	7.0529	2.65487	-1.18174	-0.0289771	1.38353		-2.12972	1.45272	2.62495	2.47346
378.5		5.96026	10.4034	10.8312	2.65487	-5.25672	4.31759	-1.01608		-1.8433	2.94628	-1.85294	1.74191
379.5		5.48723	11.7304	12.4055	1.32743	2.38386	-3.07157	1.38353		-0.401382	-1.71285	-1.01708	0.00534344
380.5		6.4333	9.34183	7.68262	0	-1.18174	5.1869	-1.01608		-1.99951	-2.25693	0.858017	-0.203477
381.5		5.96026	9.34183	10.2015	4.42478	-4.23798	-4.37554	-0.416182		-1.02969	1.66194	-2.0806	-1.31443
382.5		6.90634	8.81104	9.57179	1.76991	-9.3317	-3.50623	-1.01608		0.109984	-12.8611	-1.42526	0.449117
383.5		5.01419	11.9958	13.9798	0	0.855746	1.70965	-1.01608		-1.61221	-0.365183	0.968871	0.828559
384.5		5.01419	9.87261	11.461	3.53982	2.89324	5.1869	-1.01608		-0.127625	-7.33641	-1.58693	-0.542239
385.5		5.48723	9.34183	13.3501	0.442478	-3.21923	2.57896	-0.116231		-1.07751	-0.451948	-0.807543	0.310841
386.5		5.01419	9.87261	12.0907	1.76991	-1.18174	6.05622	-1.01608		-1.3076	0.839729	-1.91611	1.01798
387.5		5.48723	12.5265	14.6096	2.65487	-0.162999	1.70965	-1.01608		-0.92227	0.889533	-0.719182	1.96693
388.5		5.96026	NaN	NaN	NaN	7.98696	4.31759	-0.416182		-0.978619	NaN	0.362613	-0.472726
389.5		5.96026	NaN	NaN	NaN	-0.162999	1.70965	-1.01608		-1.98002	NaN	1.59603	-0.608804
390.5		5.96026	NaN	NaN	NaN	3.91198	8.66416	-1.01608		-0.785066	NaN	-2.00537	4.34467
391.5		6.90634	NaN	NaN	NaN	2.38386	-0.463634	-0.416182		-0.702016	NaN	-0.571664	0.83393
392.5		7.37938	NaN	NaN	NaN	-4.23798	2.57896	-1.01608		-1.39702	NaN	-3.02432	1.39615
393.5		7.37938	NaN	NaN	NaN	-3.21923	1.70965	-1.01608		-1.33182	NaN	-0.542189	1.27721
394.5		7.85241	NaN	NaN	NaN	-2.20049	3.44828	-1.01608		0.167141	NaN	-0.505394	-0.823922
395.5		7.37938	NaN	NaN	NaN	-1.18174	-2.63692	-1.01608		-0.798112	NaN	-0.0974573	1.42315
396.5		6.66982	NaN	NaN	NaN	1.87449	3.88293	0.483671		-1.04266	NaN	0.0656266	1.85263
397.5		8.32545	NaN	NaN	NaN	0.855746	6.92553	-1.01608		1.37156	NaN	1.26468	0.990677
398.5		8.79849	NaN	NaN	NaN	NaN	NaN	NaN		3.48291	NaN	NaN	NaN
399.5		9.74456	NaN	NaN	NaN	NaN	NaN	NaN		-0.69219	NaN	NaN	NaN
400.5		8.79849	NaN	NaN	NaN	NaN	NaN	NaN		-1.3076	NaN	NaN	NaN

## Sheet: Fig4E
Tims (s)		Individual Arteries - Centered				Individual Arteries - Edge				Individual Arteries - Away
-7.49122		1.0022	0.995487	0.989641		1.00205	1.00047	1.00863		0.999131	1.00635	0.993184
-6.65886		1.00151	0.995533	0.996976		1.00212	1.0035	0.996276		1.00189	0.997385	0.997239
-5.82651		1.00018	1.00164	0.998108		0.997925	1.00057	0.996349		0.999736	0.9974	1.00022
-4.99415		0.999611	0.998658	1.00146		1.00651	0.997619	1.00361		0.999691	1.00634	0.994089
-4.16179		0.997553	0.998777	1.00451		0.997368	0.997668	0.996568		0.998227	1.00637	1.00017
-3.32943		0.995511	1.00178	0.995495		0.993167	1.00071	1.00081		0.998889	1.00038	1.00114
-2.49707		0.997778	0.998922	1.0017		1.00682	1.00378	1.00194		0.99954	1.00035	0.997056
-1.66472		0.99786	1.00198	0.992624		1.00339	1.00382	1.00008		1.00244	0.994373	0.993939
-0.832358		1.00297	0.999065	1.00405		0.99417	1.00086	1.00428		1.00244	0.994362	1.00512
0		1.00811	0.999146	1.00215		1.00066	0.994885	0.996235		0.999601	1.00031	1.0081
0.832358		0.968923	0.97219	0.965084		0.970007	0.988957	0.978572		1.00107	1.00031	1.00189
1.66472		0.911629	0.930294	0.89797		0.922213	0.962032	0.932923		1.00109	1.00028	0.999852
2.49707		0.895693	0.924374	0.886821		0.920882	0.950114	0.923691		1.00111	0.99428	0.996742
3.32943		0.892881	0.930427	0.89208		0.94174	0.956168	0.92385		0.999014	0.994282	1.00385
4.16179		0.915481	0.945539	0.900422		0.946096	0.974172	0.951094		0.999042	0.997253	1.0058
4.99415		0.922041	0.95461	0.92123		0.954003	0.974218	0.965746		0.997655	1.00023	1.00778
5.82651		0.938117	0.966686	0.949457		0.967007	0.977237	0.978225		0.996964	1.0002	1.00977
6.65886		0.950556	0.97276	0.963024		0.972116	0.983257	0.983543		0.999072	1.00317	1.0077
7.49122		0.959315	0.98185	0.964258		0.97577	0.983296	0.986723		0.999844	0.99719	0.999465
8.32358		0.967328	0.990914	0.972573		0.977262	0.98933	0.998322		1.00409	1.00315	0.9994
9.15594		0.969557	0.987957	0.968555		0.983092	0.99536	0.984918		0.998433	0.997157	1.00445
9.98829		0.973964	0.994047	0.971781		0.980305	0.995392	1.00269		1.00131	1.00013	1.00132
10.8207		0.974761	0.9911	0.98024		0.981855	0.995438	0.997589		1.00484	1.00608	0.999217
11.653		0.975543	0.994192	0.986508		0.989839	0.998453	0.998755		0.994973	0.997114	1.0012
12.4854		0.978505	0.997283	0.981525		0.995643	1.0075	1.01136		1.00065	1.00605	0.998099
13.3177		0.97422	0.994337	0.987836		0.988569	0.995547	1.00212		0.999259	0.997077	0.998027
14.1501		0.97937	0.997403	0.983879		0.984371	0.998575	1.00739		1.00564	0.99706	0.999037
14.9824		0.973602	0.991464	0.983973		0.995914	0.995606	0.996076		0.999295	0.99705	0.995881
15.8148		0.972217	0.994556	0.994469		0.988845	0.989665	1.0035		1.00284	1.00301	1.00297
16.6472		0.978819	0.994629	0.992538		0.980352	1.00169	1.00775		1.00072	1	0.994764
17.4795		0.981041	0.994703	0.987475		0.997634	0.998731	1.00051		1.00571	0.996996	0.996729
18.3119		0.981128	0.991777	0.990702		0.989124	1.00177	1.00275		0.999376	0.999972	1.00177
19.1442		0.986998	0.997868	0.986682		0.994225	1.00179	0.997616		1.00362	0.996972	0.999673
19.9766		0.988531	0.994924	0.985845		0.989312	1.00786	1.00086		1.00085	0.999941	1.00474
20.8089		0.990757	0.997996	0.989061		0.995857	1.0049	0.998897		0.999454	0.999919	1.00671
21.6413		0.986431	0.995072	0.992331		0.992364	0.998948	1.00527		0.99947	0.999893	0.996464
22.4737		0.987936	0.995146	0.986225		0.993885	0.99298	1.00851		1.00089	0.999895	0.997405
23.306		0.991645	0.998225	0.99052		1.00331	0.996021	1.00444		1.00727	1.00584	0.99227
24.1384		0.993174	0.998301	0.991709		0.999101	1.00207	1.0066		0.997405	0.999868	0.995286
24.9707		0.996865	0.998388	0.993956		0.995609	1.00209	0.994185		0.998833	1.00281	1.00542

## Sheet: Fig4I
Tims (s)		Individual Surface Arteries - Targeted									Individual Surface Arteries - Not Targeted
-7.5		0.99128	1.01231	1.0037	0.991212	1.00238	0.997769	0.988184	1.00405		0.998904	1.00538	0.996305	1.00731	1.02051	1.00432	1.00032	1.00359
-6.5		0.992969	1.01029	1.00032	0.992994	1.00912	0.999302	0.987041	1.00447		1.01002	1.01308	1.00081	1.00114	1.01533	1.00628	1.00245	1.0015
-5.5		0.98779	1.00641	1.00522	0.999146	1.0053	1.00319	0.993958	1.00422		0.992265	1.0075	0.99715	0.999214	1.00206	0.999047	1.00093	0.997942
-4.5		0.98685	1.00346	1.00552	1.00384	1.00204	1.0007	0.999351	1.00454		0.995925	1.00231	1.0021	1.00362	0.983691	0.989473	1.00326	0.996411
-3.5		0.995104	0.995346	0.997242	1.00123	0.988159	1.00021	1.00055	0.999933		0.994746	1.00386	0.99806	1.00523	1.00072	0.998037	1.00316	1.00173
-2.5		0.998342	0.998837	1.00257	1.0042	1.00106	1.00094	0.999209	0.99774		1.0026	0.99962	0.995555	1.00264	0.987142	1.0039	0.999898	0.997708
-1.5		1.00225	1.00338	1.0006	0.996005	1.0036	0.998624	1.00134	0.999327		1.00038	0.993557	1.00237	0.995735	1.01413	0.998428	0.998741	1.00016
-0.5		1.00579	1.00076	0.997096	0.999829	1.00407	0.999427	0.999083	1.00019		1.0006	1.0046	1.00596	0.997908	0.999105	0.999538	0.997269	1.00097
0.5		0.969006	0.9892	0.965537	0.946053	0.972637	0.990331	0.97165	0.993478		1.00258	1.00277	1.00061	1.00121	0.993384	0.998132	1.00271	1.00157
1.5		0.907545	0.94264	0.962665	0.904215	0.91518	0.939	0.879896	0.935084		1.00344	0.999175	1.00356	1.00032	0.984971	0.99167	0.99972	1.00104
2.5		0.901431	0.935846	0.98971	0.892278	0.895433	0.922564	0.84493	0.933613		0.999576	1.0034	0.997832	0.996764	0.957026	1.00304	0.998394	1.01084
3.5		0.912558	0.959607	0.994038	0.931578	0.890915	0.922142	0.865874	0.956093		1.00422	1.00832	1.00362	1.00093	0.953458	1.00773	0.998674	1.01437
4.5		0.926005	0.967841	0.993899	0.941038	0.90748	0.937181	0.904168	0.973411		0.996968	1.01379	0.998899	0.998301	0.977753	1.00595	0.999708	1.02134
5.5		0.950786	0.990832	1.00073	0.927736	0.945501	0.954261	0.942808	0.983915		1.00727	1.02826	0.998479	1.00038	1.00761	1.00652	1.00252	1.0144
6.5		0.951812	0.996519	1.00267	0.930877	0.973028	0.975676	0.956874	0.991251		1.00288	1.03128	1.00189	0.996661	1.01346	1.0177	0.997347	1.01625
7.5		0.953504	1.00163	0.994367	0.93269	0.975796	0.983595	0.958966	0.997614		0.997165	1.02296	1.00577	0.996956	1.00907	1.01267	0.993974	1.01177
8.5		0.964942	1.00623	0.998359	0.934473	0.991839	0.991063	0.957883	0.99447		0.996375	1.02925	0.999573	0.997992	1.01557	1.01632	0.997569	1.00835
9.5		0.974508	1.00488	0.99933	0.948381	0.987312	0.992155	0.961216	0.998232		1.00755	1.02087	1.00008	0.997419	1.02184	1.01127	0.996175	1.01689
10.5		0.97983	1.00258	1.00221	0.939994	0.992558	0.988421	0.969083	1.00227		1.01365	1.02648	0.995867	1.00085	1.04474	1.00155	1.00158	1.01766
11.5		0.977368	1.00708	1.00426	0.952618	0.999337	0.992738	0.969805	1.0011		1.00903	1.03094	0.998944	0.999067	1.01387	1.00341	0.999229	1.01941
12.5		0.979707	1.01198	0.998571	0.949274	1.00323	0.986286	0.96727	1.00231		1.00986	1.03248	1.0032	0.999891	1.01732	1.0004	0.999441	1.02084
13.5		0.980365	1.01479	1.00019	0.941562	1.00395	0.986635	0.970242	1.00747		1.00602	1.03211	1.00373	0.996401	1.02197	1.00191	1.00367	1.02256
14.5		0.978581	1.01932	0.998837	0.94453	1.00861	0.98735	0.977561	1.00732		1.01579	1.03891	1.00092	0.997641	1.0093	1.00092	1.00393	1.02404
15.5		0.97923	1.02613	0.998494	0.944792	0.989038	0.985041	0.977564	1.00841		1.00701	1.03749	0.99667	0.999424	1.02682	1.00284	1.00436	1.02324
16.5		0.981055	1.02236	1.00107	0.940381	0.984508	0.984644	0.971844	1.00965		1.0075	1.03128	1.00249	0.998426	1.01342	1.00288	1.00433	1.02365
17.5		0.97753	1.03418	1.00137	0.941611	0.979323	0.985069	0.972667	1.00736		0.999018	1.03144	1.00159	0.998878	0.975561	1.00474	1.00584	1.01971
18.5		0.978053	1.0317	1.0032	0.947366	0.984362	0.986504	0.97278	1.00647		0.998753	1.03072	1.00002	0.99936	0.979166	1.00284	1.00526	1.01559
19.5		0.978709	1.0263	0.999381	0.956422	0.98063	0.983469	0.971446	1.00457		1.00304	1.02954	1.00116	0.9975	0.997451	1.00999	1.00853	1.01331
20.5		0.979683	1.0184	1.00031	0.964733	0.98621	0.987065	0.978837	1.00216		1.00006	1.02649	1.00367	0.992185	1.01736	1.00519	1.00641	1.00748
21.5		0.983508	1.01941	0.997681	0.980535	0.990738	0.987766	0.983076	1.00111		0.99981	1.03346	0.998449	0.996923	1.00185	0.997409	1.01202	1.00496
22.5		0.983214	1.01659	0.998738	0.970086	0.997157	0.989168	0.986769	0.998264		1.0057	1.03461	0.993824	1.00369	0.990287	1.00229	1.00809	1.00318
23.5		0.982775	1.02682	0.999497	0.979497	0.993787	0.991907	0.983836	1.00024		1.00057	1.03854	0.999494	0.996119	1.00585	0.994967	1.00797	1.00225
24.5		0.977184	1.01784	0.999139	0.96793	0.992201	0.990328	0.991872	1.0027		1.00014	1.03529	1.001	0.994907	1.00973	0.997948	1.00567	1.00257
25.5		0.979077	1.01409	1.00344	0.962405	0.996502	0.990681	0.989237	0.999234		0.995088	1.02514	0.999633	0.998329	0.999415	0.998929	1.01127	1.0029
26.5		0.982148	1.01827	1.00123	0.977123	0.979646	0.994002	0.989843	0.995631		1.00196	1.0236	1.00114	1.00506	0.975042	0.999152	1.00723	1.00373
27.5		0.9803	1.01705	1.00372	0.986958	0.973159	0.994572	0.988167	0.998487		0.989626	1.01956	1.00407	1.00269	0.952585	0.990017	1.01101	0.999035
28.5		0.982384	1.00708	1.00173	0.986004	0.97551	0.993702	0.987493	0.998229		1.00091	1.01469	1.00269	0.997889	0.984248	0.987873	1.00752	0.99954
29.5		0.981009	1.01279	1.00235	0.990577	0.98709	0.995276	0.987217	1.00046		1.00075	1.01679	0.998939	1.00508	1.01522	0.990618	1.00426	0.996815
30.5		0.986141	1.00917	1.00178	0.986929	0.993172	0.995807	0.981274	1.00335		0.999455	1.00937	0.994961	0.995059	0.997716	0.995404	1.00534	0.998231
31.5		0.988356	1.00952	1.0023	0.998251	0.996503	0.993049	0.984593	0.999058		0.997654	1.0154	0.9966	1.00059	1.01438	0.998751	0.997662	0.999432
32.5		0.98285	1.00305	0.99803	0.970652	1.00959	0.995143	NaN	1.00343		0.991189	1.01549	1.00141	1.01408	1.00956	0.989348	NaN	1.00382

## Sheet: Fig4M
Tims (s)		Individual Penetrating Arteries - Targeted								Individual Penetrating Arteries - not Targeted
-7.5		1.02183	0.990933	0.987984	1.00933	1.00021	1.00083	1.00077		1.00953	1.00162	1.00632	1.00342	0.982194	0.977201	1.01133	1.00053	0.987309	1.00592
-6.5		1.01248	0.994799	0.997411	1.01892	1.01332	0.996881	1.00438		1.00448	1.00006	0.99843	1.00656	0.978689	0.984926	0.994993	0.999284	0.989203	1.00565
-5.5		1.01561	0.989435	0.997974	1.00792	1.00538	0.994709	1.00251		1.01047	1.00509	0.993954	1.00323	0.986804	1.00712	0.998675	0.993659	0.982319	1.00309
-4.5		0.998808	0.981437	1.02724	1.00758	1.00464	1.00273	1.00175		1.01335	1.00915	0.992335	0.998231	0.991526	0.989745	0.9957	1.00938	0.990079	0.995352
-3.5		1.00196	0.99508	1.01259	1.00149	1.00693	0.997481	1.00138		0.984954	0.993932	1.00252	1.00099	0.984623	1.00819	1.0013	1.00767	0.997048	1.00039
-2.5		1.00052	0.990486	0.994048	1.00643	0.995551	0.997732	0.996098		1.00685	0.987816	0.993023	1.00151	1.01448	0.995835	0.998121	1.00078	0.997247	0.995782
-1.5		1.00505	1.00146	0.998543	0.998331	1.00497	0.995814	1.00133		1.00082	1.01075	1.00907	1.00234	0.997902	0.995305	0.995537	1.00066	1.0005	0.999474
-0.5		0.994483	1.0141	1.01101	0.995557	0.995598	1.0064	0.998074		0.997899	1.01603	0.999858	0.991116	0.997083	1.01154	1.00924	0.996014	1.00572	1.00477
0.5		0.970589	0.965207	0.983193	0.981774	0.985846	0.988403	1.001		0.980649	0.986728	1.00011	0.988593	0.994532	0.971248	0.997079	1.00108	0.995027	1.00039
1.5		0.952258	0.88321	0.929552	0.93186	0.931927	0.925499	0.9652		0.954937	0.984123	0.991873	0.999896	0.976869	0.988631	0.984352	0.993969	0.991977	1.00194
2.5		0.950889	0.895564	0.958895	0.933473	0.934409	0.935285	0.967502		0.973107	0.992646	0.998437	0.992448	0.982923	0.976885	0.990595	0.995922	0.996781	1.00071
3.5		0.973831	0.946533	0.975418	0.98793	0.991133	0.96583	0.986853		0.977938	1.00403	0.991899	1.01582	0.989511	0.992243	0.989046	0.998767	0.996831	1.00591
4.5		0.978835	0.954001	0.990383	1.00341	1.04087	0.973973	0.99033		0.982832	1.01894	1.00096	0.995868	0.992902	0.963807	0.989149	0.991934	0.997572	1.00892
5.5		0.989527	0.977962	0.993773	1.01662	1.05178	0.987725	0.989228		0.979916	1.00831	1.00175	1.00621	0.988029	0.976086	0.988568	1.00235	0.996943	1.00725
6.5		0.998928	0.97926	0.997075	1.01396	1.05392	0.991839	0.996229		0.992874	1.00865	1.00416	0.999092	0.987495	0.9816	0.988623	1.00985	0.999117	1.005
7.5		0.995932	0.981274	0.994575	1.00912	1.03473	0.993705	0.998893		0.996674	1.01106	1.01014	1.00625	1.00286	0.96592	1.00021	0.994331	1.00119	1.00004
8.5		0.987791	0.973475	0.989682	1.01465	1.02835	0.996899	1.00228		0.997196	1.01347	0.993953	1.00572	0.991143	0.972399	0.995054	0.997092	1.00166	1.01271
9.5		0.999032	0.975492	1.01256	1.01237	1.01916	1.00392	1.00432		0.980115	1.00715	1.00729	1.00301	0.992913	1.00568	0.991428	1.00133	1.00138	1.00701
10.5		1.0017	0.977287	0.985817	1.01133	1.01622	1.0017	1.00546		0.993498	1.00433	1.00955	1.00444	0.994827	1.00275	0.992214	0.998513	1.00818	1.01221
11.5		0.974276	0.992902	0.995713	1.01165	1.01803	0.992591	1.01242		0.988582	0.990838	1.00387	0.992983	1.00403	0.992177	0.993307	0.99176	1.0176	1.00716
12.5		0.995533	0.986993	0.999714	1.0055	1.01573	1.00192	1.00873		0.98903	0.992007	1.00287	0.990937	0.989846	0.984992	0.998044	0.996035	1.01421	1.01431
13.5		0.990767	0.982807	0.997322	1.00791	1.01131	1.00189	1.01244		0.983329	0.998104	0.995568	0.986668	1.00831	0.986042	0.985546	1.00366	1.01699	1.01538
14.5		0.984985	0.986601	1.0052	1.01321	1.00983	1.00197	1.00329		0.983174	1.00346	1.00546	0.989996	0.990725	0.978196	0.985484	1.00396	1.01143	1.01907
15.5		0.989395	0.974022	1.0014	1.01506	1.01578	1.00907	1.00406		0.986853	1.0029	0.998643	0.99327	1.00373	0.967394	0.997832	0.994937	1.00969	1.01002
16.5		0.993168	0.975026	1.01133	1.01236	1.01865	1.01086	1.00364		0.975341	1.01093	1.00943	0.991487	0.999298	0.995579	0.984859	1.00175	1.01465	1.01208
17.5		1.00624	0.97551	0.986104	1.00726	1.01686	1.00394	1.00492		1.0027	1.01497	1.0051	1.0106	0.986195	1.00073	1.00273	1.00127	1.01544	1.01215
18.5		1.01664	0.99375	0.998871	1.01064	1.02295	1.01419	1.01596		1.00822	1.01743	1.00767	1.00476	1.00944	0.97662	1.00998	1.003	1.02346	1.01878
19.5		0.996824	0.999154	0.998321	1.01849	1.00746	1.01389	1.02227		1.01428	1.01582	1.01555	1.0135	1.00563	0.992286	1.00105	1.00293	1.02547	1.01688
20.5		1.00902	1.0095	0.999567	1.01273	1.01763	1.0103	1.01868		0.986785	1.02109	1.01117	1.02179	0.996966	0.99726	1.00431	1.00144	1.0303	1.02128
21.5		1.0118	1.0004	1.0005	1.02021	1.01572	1.01681	1.01857		0.995665	1.00418	1.01534	1.00449	1.00351	0.969177	0.991198	1.00283	1.01783	1.02707
22.5		1.01338	0.991506	1.01364	1.0147	1.01688	1.01373	1.01118		0.996941	1.00839	1.00937	1.00479	1.01516	0.991578	0.998049	1.00207	1.01794	1.02012
23.5		1.00766	1.00585	1.00471	1.01681	1.01811	1.01217	1.01327		0.993564	1.00817	0.996834	0.988766	0.996471	0.980587	0.99762	1.00425	1.01255	1.02127
24.5		1.01666	0.997938	1.00536	1.00789	1.0005	1.01901	1.0179		1.01293	1.0128	0.990329	0.992728	1.00845	0.985235	0.993584	1.00085	1.01854	1.02063
25.5		1.00538	0.989788	1.00298	1.01109	1.00677	1.01062	1.01918		0.999387	1.01014	1.00186	0.99153	0.989401	0.981387	0.993947	1.00273	1.02225	1.02235
26.5		1.01446	0.990501	1.01893	1.00613	0.999291	1.00709	1.01191		1.01468	1.00272	0.998482	0.978982	1.01048	0.999778	0.99791	0.994501	1.02049	1.01643
27.5		1.01281	0.983323	0.996286	1.0086	1.0152	1.0114	1.00924		1.00461	1.01444	0.994127	1.00342	0.999884	0.9885	0.994093	0.998262	1.01634	1.01894
28.5		0.999202	0.997558	0.991381	1.01187	1.01867	1.00519	1.01404		1.01999	1.01573	1.00681	0.995408	0.993731	0.996105	0.986604	0.996874	1.00493	1.0122
29.5		1.01863	0.996489	1.00593	1.01094	1.02539	1.00522	1.01094		1.01747	1.01156	0.988081	0.998982	0.991346	0.971093	0.992256	0.994288	1.00803	1.01144
30.5		1.00839	NaN	0.99379	NaN	NaN	0.999129	1.00776		1.00749	1.01007	NaN	NaN	0.966839	0.99868	1.00128	1.00068	1.00816	1.00737
31.5		NaN	NaN	NaN	NaN	NaN	0.999297	1.00938		NaN	NaN	NaN	NaN	NaN	NaN	NaN	NaN	1.00301	0.99979
32.5		NaN	NaN	NaN	NaN	NaN	1.00932	1.00243		NaN	NaN	NaN	NaN	NaN	NaN	NaN	NaN	1.00358	1.01637

## Sheet: Fig4-1_C
Tims (s)		Individual Surface Arteries									Individual Surface Veins
-7.5		0.99128	1.01231	1.0037	0.991212	1.00238	0.997769	0.988184	1.00405		0.996944	1.00447	1.00571	0.999817	0.999949	0.998627	0.998438	1.00184
-6.5		0.992969	1.01029	1.00032	0.992994	1.00912	0.999302	0.987041	1.00447		0.998337	1.00096	1.00261	0.993587	1.00025	0.999016	1.00177	1.00596
-5.5		0.98779	1.00641	1.00522	0.999146	1.0053	1.00319	0.993958	1.00422		0.9968	1.00269	1.0051	0.99499	1.0005	0.996635	1.00183	1.00167
-4.5		0.98685	1.00346	1.00552	1.00384	1.00204	1.0007	0.999351	1.00454		0.997257	1.00048	1.00311	0.997978	1.00024	0.997402	0.999042	1.00056
-3.5		0.995104	0.995346	0.997242	1.00123	0.988159	1.00021	1.00055	0.999933		1.0002	0.999535	1.00066	1.00032	1.00028	0.99487	1.00344	1.00077
-2.5		0.998342	0.998837	1.00257	1.0042	1.00106	1.00094	0.999209	0.99774		1.00015	0.998023	1.00486	1.00398	0.999329	0.998883	1.00068	1.00139
-1.5		1.00225	1.00338	1.0006	0.996005	1.0036	0.998624	1.00134	0.999327		1.00139	1.00373	1.00231	0.995705	1.0001	0.998961	0.998547	0.99951
-0.5		1.00579	1.00076	0.997096	0.999829	1.00407	0.999427	0.999083	1.00019		0.997825	1.0002	1.0055	0.998922	1.00008	1.00532	0.9952	0.99995
0.5		0.969006	0.9892	0.965537	0.946053	0.972637	0.990331	0.97165	0.993478		1.003	0.997546	0.99951	0.996284	1.00084	1.00116	1.00607	1.00099
1.5		0.907545	0.94264	0.962665	0.904215	0.91518	0.939	0.879896	0.935084		0.997824	0.993834	1.00132	0.995116	0.999798	1.00041	1.00032	1.00125
2.5		0.901431	0.935846	0.98971	0.892278	0.895433	0.922564	0.84493	0.933613		0.995837	0.99433	1.0015	0.99696	0.999006	0.999657	0.998693	0.995771
3.5		0.912558	0.959607	0.994038	0.931578	0.890915	0.922142	0.865874	0.956093		1.00475	0.99649	1.00604	0.992533	0.999345	1.00355	0.996222	1.002
4.5		0.926005	0.967841	0.993899	0.941038	0.90748	0.937181	0.904168	0.973411		0.999832	0.997952	1.00274	0.984576	0.998852	0.997332	0.996914	0.999259
5.5		0.950786	0.990832	1.00073	0.927736	0.945501	0.954261	0.942808	0.983915		0.997456	0.992172	1.00381	0.988363	1.00025	0.99915	0.992581	0.996729
6.5		0.951812	0.996519	1.00267	0.930877	0.973028	0.975676	0.956874	0.991251		1.00185	0.996434	1.00253	0.99523	0.998953	0.988357	0.997816	0.997414
7.5		0.953504	1.00163	0.994367	0.93269	0.975796	0.983595	0.958966	0.997614		0.997867	0.991371	1.00231	0.984631	1.00066	0.998245	0.995557	0.996532
8.5		0.964942	1.00623	0.998359	0.934473	0.991839	0.991063	0.957883	0.99447		0.996757	0.995929	1.00111	0.99075	1.00009	1.00042	0.99235	1.00215
9.5		0.974508	1.00488	0.99933	0.948381	0.987312	0.992155	0.961216	0.998232		0.994678	0.994997	1.00244	0.993944	0.999813	0.996218	0.995884	0.999603
10.5		0.97983	1.00258	1.00221	0.939994	0.992558	0.988421	0.969083	1.00227		0.993894	0.99502	1.00455	0.992968	0.999278	0.990994	0.993058	0.995514
11.5		0.977368	1.00708	1.00426	0.952618	0.999337	0.992738	0.969805	1.0011		0.997888	1.00124	1.00082	0.989024	1.00042	0.996401	0.994684	1.00138
12.5		0.979707	1.01198	0.998571	0.949274	1.00323	0.986286	0.96727	1.00231		0.998278	0.998101	0.999636	0.989098	1.00054	0.992295	0.993698	1.00151
13.5		0.980365	1.01479	1.00019	0.941562	1.00395	0.986635	0.970242	1.00747		0.997896	0.998478	1.00309	0.985439	1.0013	0.993315	0.994563	0.997036
14.5		0.978581	1.01932	0.998837	0.94453	1.00861	0.98735	0.977561	1.00732		0.999505	0.998286	1.00056	1.00057	1.00039	0.996722	0.994142	1.00466
15.5		0.97923	1.02613	0.998494	0.944792	0.989038	0.985041	0.977564	1.00841		0.995806	1.00228	1.00257	0.993152	0.998652	0.995815	0.997037	1.0023
16.5		0.981055	1.02236	1.00107	0.940381	0.984508	0.984644	0.971844	1.00965		0.998218	1.00255	1.00201	0.990167	0.999581	0.996841	0.99801	1.00459
17.5		0.97753	1.03418	1.00137	0.941611	0.979323	0.985069	0.972667	1.00736		0.99833	1.00296	1.00462	1.00096	0.999563	0.996115	0.995175	0.998089
18.5		0.978053	1.0317	1.0032	0.947366	0.984362	0.986504	0.97278	1.00647		0.997404	0.994083	1.00208	0.992794	1.00015	1.00198	0.993712	1.00182
19.5		0.978709	1.0263	0.999381	0.956422	0.98063	0.983469	0.971446	1.00457		0.995553	1.00137	1.00154	0.997811	1.00083	0.99299	0.994606	0.998622
20.5		0.979683	1.0184	1.00031	0.964733	0.98621	0.987065	0.978837	1.00216		0.997955	1.00373	0.999855	0.993777	0.999908	0.997222	0.99767	0.998442
21.5		0.983508	1.01941	0.997681	0.980535	0.990738	0.987766	0.983076	1.00111		0.996372	1.00477	1.00255	0.996827	1.00067	0.99383	0.997722	1.00097
22.5		0.983214	1.01659	0.998738	0.970086	0.997157	0.989168	0.986769	0.998264		0.998492	0.997782	1.0024	1.00333	0.999233	0.998684	0.99473	1.00067
23.5		0.982775	1.02682	0.999497	0.979497	0.993787	0.991907	0.983836	1.00024		1.00117	1.00124	0.999191	0.995652	1.00012	0.995789	0.994744	1.0006
24.5		0.977184	1.01784	0.999139	0.96793	0.992201	0.990328	0.991872	1.0027		0.996006	1.00654	1.00274	0.989964	0.999974	0.99457	0.995093	0.999521
25.5		0.979077	1.01409	1.00344	0.962405	0.996502	0.990681	0.989237	0.999234		0.999585	0.99869	0.999236	0.999214	0.999693	1.00222	0.998357	0.999028
26.5		0.982148	1.01827	1.00123	0.977123	0.979646	0.994002	0.989843	0.995631		0.99747	1.00723	0.999264	1.00221	1.00003	0.997154	1.00036	1.00153
27.5		0.9803	1.01705	1.00372	0.986958	0.973159	0.994572	0.988167	0.998487		1.00198	1.00206	1.00292	0.998696	1.00121	0.990978	0.998543	1.00167
28.5		0.982384	1.00708	1.00173	0.986004	0.97551	0.993702	0.987493	0.998229		0.996807	0.997015	1.0049	0.99452	1.00107	0.999912	0.998377	1.00237
29.5		0.981009	1.01279	1.00235	0.990577	0.98709	0.995276	0.987217	1.00046		0.998439	1.00333	1.00498	0.990883	1.00068	0.997302	0.997261	1.00278
30.5		0.986141	1.00917	1.00178	0.986929	0.993172	0.995807	0.981274	1.00335		0.998567	1.00474	1.00601	0.997769	1.00169	0.996111	0.996792	1.00001
31.5		0.988356	1.00952	1.0023	0.998251	0.996503	0.993049	0.984593	0.999058		0.999229	0.998851	1.00318	0.99964	1.00116	0.993549	0.998438	1.00032
32.5		0.98285	1.00305	0.99803	0.970652	1.00959	0.995143	NaN	1.00343		0.994849	0.997386	0.99933	0.98842	1.00115	1.00594	0.996276	0.998597

## Sheet: Fig5I
		Individual Arteries Power 15 mW																												Individual Arteries Power 15 mW
		Distance from stimulation																												Distance from stimulation
Tims (s)		0				10				25				50				75				100				150				0				10				25				50				75
-7.76602		1.00023	0.998838	1.00473		1.0029	0.99714	0.999876		1.00598	0.999242	1.00204		1.00829	1.00006	1.00103		1.00656	0.997383	0.996769		1.00849	0.999021	1.00322		1.00213	0.994172	0.999229		0.997651	0.992275	1.00677		1.0003	0.996949	1.00912		0.998872	0.994437	0.996659		1.003	0.993259	1.00217		1.0009	1.00645	0.996296
-7.49823		0.992524	1.0001	1.00017		1.00036	0.993593	1.00124		1.00836	0.997164	0.999801		1.01006	0.998003	1.00061		1.00551	0.997423	0.999975		1.00923	0.996913	0.997826		1.00039	0.996138	1.00128		0.994984	0.995826	1.00765		0.999105	1.00663	1.00826		0.997088	1.00218	0.998042		1.00221	0.993426	0.999671		1.00058	1.00653	0.992793
-7.23043		0.994601	0.998873	1.00017		1.00463	0.9937	0.998979		1.00458	0.997183	1.00339		1.00282	1.00007	0.997245		1.00557	0.999151	1.00227		1.00642	0.994855	1.00142		1.00049	0.995556	1.00336		0.997165	1.00297	1.0124		0.996348	1.0019	1.00895		0.997209	1.00329	1.00008		0.999463	0.992631	0.993807		1.00023	1.00654	0.993398
-6.96264		1.00153	0.994022	1.00017		1.00256	0.996715	1.00126		1.0046	0.999265	0.998028		1.00238	0.998013	1.00185		1.00917	0.998725	0.996392		1.0042	0.999056	1.00323		1.00005	0.995705	0.998405		0.995309	0.99508	1.00831		0.998364	1.00865	1.00981		1.00028	1.00248	0.998384		0.999067	0.99713	1.00376		0.998842	0.997356	0.991264
-6.69484		0.998788	0.999699	1.00245		1.00109	0.998445	1.00355		1.00632	0.997199	0.997593		1.0047	0.998428	0.998078		1.00693	0.996546	1.00139		0.998911	1.00113	0.999176		0.995446	0.995115	0.999221		1.0024	0.98993	1.01551		0.998055	0.995237	1.0035		0.995529	1.00068	1.00052		0.997921	1.00068	0.996395		1.00101	1.00184	0.998094
-6.42705		0.99719	0.997256	1.00017		0.996437	0.999209	0.998091		1.00195	0.995126	0.998928		0.99571	1.0005	1.00268		1.00009	0.997865	0.998478		1.00151	0.99907	1.00143		0.987284	0.994157	0.998824		1.00082	0.99431	1.0105		0.996704	1.00282	1.00742		0.998127	1.00657	0.99899		1.00049	0.999015	0.999655		1.00015	1.0018	0.992984
-6.15926		0.996173	0.995279	0.995596		1.00083	1.00407	0.995825		1.00151	0.997224	1.00073		1.0008	0.998028	0.998486		1.00192	1.00001	1.00098		0.997447	0.996952	0.998729		0.990442	0.99412	0.998812		1.00111	0.994364	1.01044		0.994927	1.00391	1.0072		0.993865	1.00768	0.997362		0.998683	1.0017	0.99867		1.00133	1.00615	0.998974
-5.89146		0.991192	0.996491	1.00016		0.997719	0.998055	1.00175		1.00112	0.995153	1.00474		0.999397	1.00134	1.00267		0.999234	0.998735	0.995083		1.0001	1.00112	0.997836		0.995767	0.991183	0.999635		0.997702	0.994423	1.0113		0.995009	1.00501	1.00199		0.994094	1.00117	0.998582		0.998417	1.00091	1.00032		1.00243	1.00156	1.00562
-5.62367		0.992952	1.00015	1.00016		0.996742	0.99849	1.00403		1.00175	0.99724	1.00028		0.996	1.00135	0.99722		0.998804	0.999142	1.00144		1.00071	0.996949	1.00323		0.991826	0.99167	1.00252		0.994857	0.988398	1.00803		0.996589	1.00389	1.00193		0.994695	0.999386	0.998548		0.997968	1.00101	0.996171		0.999051	1.01486	1.00442
-5.35588		0.992452	0.99491	0.99788		0.998438	0.997653	0.998118		1.00293	0.997249	0.998941		0.995015	0.998047	0.998473		1.00178	1.00131	0.997819		1.0034	1.00111	0.999625		0.996015	0.999109	0.998791		0.998005	0.990179	1.00521		0.994238	1.00215	0.998811		0.993943	0.999587	0.995352		0.998222	0.998473	1.00421		0.995377	1.01022	0.998978
-5.08808		1.00035	0.997756	0.997879		0.995377	0.995096	0.99949		1.0019	0.999331	0.9985		0.997234	0.999287	1.00098		0.998383	0.998718	1.00056		1.00049	0.996961	1.00008		0.994933	0.995139	0.997549		0.993148	0.993702	0.996205		0.997257	1.00215	0.998867		0.996406	0.997828	1.00147		0.992193	0.995022	1.00324		0.999565	1.00563	1.00447
-4.82029		0.988109	0.996045	1.00016		0.996487	0.996802	0.999495		0.999746	0.997253	0.999402		1.00078	0.998471	1.00014		0.995572	1.00003	0.999232		1.00179	0.999016	0.997386		1.00034	0.99808	1.00004		0.993965	0.995372	1.00342		0.9979	1.00715	0.997941		0.994724	1.00085	0.993491		0.99494	1.00573	0.998308		0.997007	1.00558	0.998767
-4.55249		0.997685	0.998988	0.997878		0.99712	0.99768	1.00133		1.00199	0.999347	0.998071		1.00314	0.997655	0.99846		0.997456	0.997865	1.00104		1.00359	0.996896	0.998286		0.996841	0.997143	0.999199		0.997547	0.994641	1.00571		0.999938	1.00127	0.99928		0.995908	1.00666	0.998066		0.994452	0.99784	0.992332		0.996615	1.01006	1.00283
-4.2847		0.997693	0.998599	1.00016		0.998819	0.997681	0.998611		1.0021	0.997279	0.999856		1.00033	1.00138	1.00306		0.99955	0.998736	0.998801		1.003	0.999064	0.999638		1.00058	0.999076	1.00085		0.99731	0.997378	1.00082		0.998604	1.00704	1.00151		1.001	1.00209	1.00155		0.995629	1.00059	0.996688		0.998789	1.00541	1.00512
-4.01691		1.00118	0.996988	1.00016		1.00212	0.997711	0.999527		1.00723	0.997294	0.997622		1.00209	0.996425	0.999284		1.00253	0.997866	0.999247		1.00676	0.996944	0.997387		1.00119	0.998561	0.998793		1.00732	0.998268	1.0016		0.999841	1.00424	1.00151		1.00061	0.998485	0.994684		0.994886	1.00653	0.998265		1.00243	1.00542	0.999312
-3.74911		1.00968	0.999016	1.00244		1.00326	0.997719	0.99952		1.00448	0.9952	1.00075		0.996428	0.998086	1.00054		0.997958	1.00221	1.00203		1.00453	0.996916	0.998285		0.99897	1.00003	0.998369		1.00145	0.991388	1.00002		0.999937	1.00412	1.00373		0.998837	0.999533	1.00128		0.999075	1.00438	0.999727		1.00164	1.00077	0.997874
-3.48132		1.00465	0.999619	0.997875		0.99952	1.00373	1.0009		0.999579	0.997303	0.99852		1.00049	0.998504	1.00137		1.00214	0.998751	1.00385		1.00173	1.00322	0.99964		0.999591	0.998073	1.00001		1.00296	0.996444	0.996678		0.997136	1.00038	0.999181		1.00044	0.997842	1.00117		0.996551	0.998198	0.996348		1.00127	1.00091	0.997387
-3.21353		0.99797	0.997824	1.00015		0.998609	0.996865	0.998181		1.00187	0.995232	1.00165		1.00004	0.998513	1.00137		0.998182	0.999183	0.999796		1.00129	0.999062	0.998734		1.00027	0.997589	0.999997		1.00394	0.997539	1.00154		1.00065	0.999422	0.998413		1.00204	0.99801	1.00036		0.995862	1.00355	0.997946		1.00144	0.996269	1.00451
-2.94573		0.995815	1.00229	1.00244		0.998255	0.998711	1.00091		0.998002	1.00147	0.999417		1.00176	0.999757	0.999269		1.00002	1.00092	0.999792		0.995426	0.998995	0.99829		0.99681	1.00002	1.00167		1.00564	0.997615	1.00224		0.999351	0.992729	0.998455		1.00112	0.999122	0.998718		0.996818	0.999349	1.00129		1.00307	1.00081	1.00078
-2.67794		0.998093	0.99745	1.00244		1.00038	1.00335	1.00184		1.00032	0.997339	1.00077		1.00139	0.99976	0.999261		0.998868	0.997459	0.998897		0.996679	0.99694	1.00144		0.99929	1.00299	0.997531		1.00266	0.996773	1.0004		1.00133	1.00149	1.00289		1.0013	0.994499	1.0025		0.996924	1.00288	1.00206		1.00013	0.996167	1.00297
-2.41014		1.00139	0.998683	0.99559		1.00044	0.999483	0.998639		0.999895	0.999435	0.998085		1.00544	1.00142	0.999675		0.996653	1.00221	0.996645		1.00503	1.00114	0.999188		1.00005	0.999509	1.00207		0.999294	0.994177	1.00277		1.00287	1.00723	1.00275		1.00095	0.995626	0.997688		0.99565	1.00204	0.99877		1.00174	1.00524	1.00544
-2.14235		0.997644	1.00071	1.00243		0.99683	0.999044	1.00003		0.999366	1.00151	1.00077		0.999226	1.00557	1.0026		1.00068	0.998324	0.99798		0.997457	0.99901	1.00143		0.999444	0.999528	1.00123		0.99781	0.998541	1.00604		1.00246	0.993088	0.998261		0.997728	0.998598	1.00248		0.999183	0.993365	1.00038		0.999925	1.00066	0.999039
-1.87456		1.0027	1.00346	1.00244		0.99751	0.997796	0.996385		1.00058	0.999453	0.999432		0.999872	0.996888	1.00092		0.999593	0.997438	0.992587		1.00103	1.00113	0.99919		1.00485	0.99851	0.99999		0.997977	0.996925	1.00038		0.999859	1.00553	1.00357		1.00079	0.998805	1.00382		1.00141	0.996974	1.00537		1.00307	1.00515	1.00128
-1.60676		0.998189	1.00035	1.00244		1.00174	0.9978	0.995478		0.996708	1.00361	1.00168		0.998784	1.0002	0.999667		1.00126	1.00004	1.00121		1.0021	1.00318	1.00369		1.00021	1.00149	0.99918		0.999674	0.998491	1.00581		1.00086	1.00549	0.998972		0.999478	1.00259	1.00292		1.0021	1.00145	0.998744		0.993912	1.00054	1.00301
-1.33897		0.994828	0.999895	0.99787		1.00122	0.996528	1.00414		1.0033	0.99943	1.00079		0.998792	1.00186	0.997992		1.00014	1.00046	0.998954		0.99927	1.00106	1.00053		1.0031	0.996041	0.99671		0.99763	1.00633	0.992756		0.997004	0.993796	0.997454		0.996669	0.997814	0.995705		1.00222	1.00145	1.00194		0.999381	1.00039	0.996297
-1.07118		1.00115	0.99992	1.00015		1.00121	0.999077	0.998239		1.00281	0.999441	1.0008		1.00115	1.00063	1.00135		1.00305	1.00001	0.999004		1.00045	0.996836	1.00054		0.999033	1.00245	0.997533		0.999156	1.00453	0.998423		0.999423	0.995741	1.00188		0.999165	1.00354	0.999419		1.00138	1.00332	0.998645		0.998714	1.00039	0.992417
-0.803381		0.997949	1.00035	0.997873		0.997664	0.997383	1.00006		0.998444	1.00152	0.997241		0.997126	0.998155	1.00093		1.0001	1.0013	0.999861		0.999325	1.00098	0.998736		1.00379	0.998558	1.00333		0.997619	0.998445	0.995924		0.99859	0.993785	0.999578		1.00218	1.00257	0.998622		1.0026	0.998851	0.999507		0.996361	1.00032	0.999245
-0.535588		1.00786	1.00034	0.995584		1.00127	1.00552	1.00052		0.997213	1.00151	0.99903		1.00065	1.00106	0.998842		1.00014	0.999995	1.00396		0.998885	1.003	1.00188		0.99556	1.00149	1.00086		1.00435	1.00545	0.998328		1.00009	1.00052	1.00174		1.00176	1.00257	0.996927		1.00325	0.99621	1.00589		0.99905	0.991256	1.0019
-0.267794		0.996719	1.00195	1.00015		0.999148	1.00209	1.00234		0.994388	1.00358	0.999925		0.998957	0.999412	0.99801		0.999526	0.999998	1.00078		0.997107	0.998825	0.998731		0.99972	0.999434	1.00127		0.990719	1.00451	0.998142		0.999159	0.998544	0.997114		0.999534	1.00064	1.00079		1.00284	0.998899	0.996187		0.9991	1.00017	0.999244
0		0.993863	0.997898	1.00015		1.00087	1.00467	1.0028		1.00064	1.00358	1.00128		0.998391	1.00025	0.998426		0.999069	1.00128	1.00442		0.996562	0.998771	0.999635		0.996776	1.00386	1.00045		0.996107	1.0106	0.998833		0.999733	1.00627	0.994698		0.996122	1.0035	0.996835		1.00285	0.997121	0.99677		0.99918	1.0003	0.997856
0.267794		0.994978	0.998743	1.00244		0.997261	1.0034	0.996893		0.998873	1.00565	0.998155		1.00069	0.996126	1.00011		0.998546	0.999549	1.00352		1.00019	0.99876	0.995579		1.00438	1.00573	1.00044		1.00082	1.00546	0.996367		1.00397	1.00236	0.993272		1.00108	0.994938	0.995809		1.00394	0.992692	0.999359		1.00021	0.991241	1.00106
0.535588		0.992726	1.00237	1.00016		0.994923	1.00382	0.997813		1.00008	0.999417	0.999059		0.997307	1.00068	1.00053		0.996661	1.00431	1.00669		0.999531	1.00081	0.999176		0.998538	1.00332	0.997972		0.9885	0.992331	0.98624		0.992325	0.994654	0.992457		0.997306	0.993034	0.989426		1.00103	0.994589	1.00012		0.996743	0.995635	0.996108
0.803381		0.99334	0.998734	1.00244		0.994016	0.99867	1.00146		1.00007	0.99941	1.00175		0.996784	0.999858	1.00054		0.996678	1.0056	1.00129		1.00249	1.0008	0.999178		0.999654	1.0028	0.998395		0.979935	0.979222	0.97237		0.987555	0.98695	0.976536		0.996382	0.992981	0.981669		1.00075	0.98327	0.99179		0.997839	0.990889	0.995204
1.07118		0.985685	1.00076	0.997873		0.993371	0.996096	1.00237		0.997836	1.00565	1.00086		0.9945	0.999452	1.00011		0.99434	1.00122	1.00083		1.00125	1.00077	1.00053		0.999604	0.999802	1.00005		0.974732	0.960906	0.956856		0.986751	0.975436	0.971103		0.996481	0.97677	0.980673		0.997827	0.987513	0.990954		0.996435	0.982109	0.99102
1.33897		0.986029	0.997996	1.00016		0.995991	1.00081	0.998746		1.00058	1.00148	0.9973		0.992846	0.996991	1.00012		0.992993	0.99991	1.00356		0.997077	1.00069	0.998735		0.997296	1.00422	0.99593		0.971581	0.956508	0.960865		0.984875	0.962136	0.961398		0.993633	0.969137	0.972113		0.996493	0.976145	0.983491		0.993862	0.990946	0.987883
1.60676		0.984319	0.999559	0.997873		0.9955	0.999935	0.996015		1.00114	1.00355	0.99597		1.00129	1.00071	0.997611		0.998831	1.00383	0.999956		1.00187	0.99653	0.998729		1.00196	1.00272	0.998402		0.967653	0.949423	0.94837		0.984999	0.961896	0.962765		0.993246	0.966296	0.971989		0.999205	0.984154	0.990832		0.994958	0.981963	0.986216
1.87456		0.991704	0.998745	1.00244		0.996533	0.999098	0.999658		1.00674	0.999392	1.00312		1.00657	0.996999	1.00054		0.998323	1.00119	0.999036		1.00896	0.998549	0.999627		1.00437	1.00075	0.998		0.969193	0.943485	0.949907		0.98268	0.964785	0.950568		0.994785	0.977684	0.975862		0.99775	0.982452	0.990781		0.99522	0.981766	0.987542
2.14235		0.98669	0.999547	0.995588		0.997617	0.999521	1.00013		1.0073	1.00146	1.00045		1.0112	0.997005	1.00055		0.995932	1.0003	1.00042		1.01307	1.00683	0.998269		1.0138	0.996255	0.999246		0.968827	0.944247	0.952397		0.986392	0.958042	0.956555		0.996402	0.975778	0.9718		0.997939	0.983359	0.982555		0.99161	0.986332	0.985187
2.41014		0.998928	0.998364	0.995586		1.00243	0.999531	1.00013		1.00677	0.997307	1.00225		1.01	0.998674	1.00055		1.0019	1.00161	1.00225		1.01769	0.996427	1.00096		1.01151	1.00166	1.00131		0.97662	0.948524	0.952386		0.984678	0.958006	0.948072		0.995543	0.970085	0.971891		0.998306	0.981549	0.989214		0.994941	0.981745	0.98823
2.67794		1.00163	0.996039	1.00015		1.00628	0.999536	1.00014		1.00961	1.00354	0.997796		1.01234	1.00199	1.00139		1.0037	1.00246	1.00131		1.01838	0.996393	0.996469		1.0168	1.00216	0.998011		0.973811	0.945856	0.939125		0.987604	0.958942	0.952676		0.997303	0.98026	0.968311		0.99835	0.988678	0.988346		0.9935	0.990577	0.987979
2.94573		1.00301	1.0012	1.00016		1.00523	0.997485	0.99923		1.0112	1.00145	0.999576		1.01457	0.998686	1.00265		1.00994	1.00028	0.998621		1.02425	1.00052	0.999167		1.0121	1.00162	0.999673		0.973873	0.94497	0.946408		0.989139	0.962763	0.955622		0.999285	0.984313	0.962928		0.999729	0.989513	0.987358		0.9951	0.995099	0.98467
3.21353		1.00418	0.99996	0.995591		1.00689	0.997068	0.998322		1.01127	0.999374	1.00138		1.01514	1.00159	1.00056		1.00771	1.00376	1.00311		1.02618	1.00253	1.00277		1.01569	1.0021	0.998844		0.972484	0.951978	0.950551		0.987438	0.965297	0.953299		0.994502	0.974821	0.961989		0.998392	0.984144	0.98575		0.994191	0.995059	0.98465
3.48132		1.00697	0.997151	0.99559		1.00792	0.998675	0.999705		1.01401	1.00145	0.997365		1.01291	0.995396	1.0014		1.01013	0.996776	1.0027		1.02609	1.0088	0.997366		1.01915	0.999657	1.00174		0.978519	0.95278	0.952886		0.985098	0.97312	0.947811		0.995247	0.978573	0.962701		1.00195	0.975487	0.989779		0.992286	0.994866	0.979761
3.74911		1.00646	1.00282	1.00016		1.00905	0.996954	1.00244		1.01011	0.999359	1.00006		1.01219	0.99788	1.0014		1.01136	1.00197	0.997741		1.02378	1.00044	1.00006		1.01272	0.998153	1.00339		0.973902	0.95268	0.951972		0.986183	0.972788	0.952496		0.994377	0.977644	0.961041		1.00218	0.990465	0.988057		0.995481	0.994908	0.986774
4.01691		1.00472	1.00119	0.995594		1.00433	0.996965	1.00062		1.01071	0.995205	0.998724		1.01015	0.997477	1.00057		1.01541	1.00371	0.99952		1.0196	0.998326	0.998712		1.01394	1.00211	0.995973		0.975175	0.950967	0.951905		0.989647	0.973924	0.955371		0.997048	0.983315	0.960148		1.00039	0.986984	0.986345		0.994758	0.999423	0.984405
4.2847		1.00078	1.00039	0.997875		1.00752	1.00137	1.00109		1.01288	1.00144	1.00141		1.00796	1.00038	1.00057		1.01308	0.998059	0.994118		1.02317	1.00242	0.998709		1.01041	0.997082	0.998863		0.97954	0.95443	0.95494		0.991208	0.973975	0.952298		0.99863	0.985261	0.963307		1.00102	0.983525	0.986371		0.996204	0.99025	0.98274
4.55249		1.00579	0.999182	0.997875		1.00546	0.996128	0.999263		1.00908	1.00143	0.998294		1.00388	1.00329	0.999315		1.01681	0.999358	0.999096		1.02026	0.996167	0.996012		1.00802	0.995635	0.997222		0.975981	0.957914	0.960481		0.994149	0.978707	0.953812		1.0003	0.991851	0.963179		1.00016	0.987035	0.985392		0.992352	0.990175	0.985004
4.82029		0.999382	1.00364	1.00244		1.00228	0.999967	0.997457		1.00746	1.00143	1.00008		1.00639	1.00288	0.999323		1.01334	1.0015	0.999585		1.01548	0.998188	1.00006		1.00624	1.00203	0.999711		0.981541	0.958805	0.95657		0.991396	0.973858	0.956849		0.998548	0.985186	0.960734		0.998321	0.987055	0.991246		0.991446	0.990101	0.98082
5.08808		1.00049	0.997144	0.997876		1.00226	0.999538	1.00156		1.00689	1.0035	1.00099		1.00755	0.99999	0.99932		1.01319	1.00148	0.99776		1.01148	1.00231	1.00051		1.00398	1.0005	1.00053		0.980518	0.961373	0.961269		0.993004	0.979652	0.963552		1.00065	0.982369	0.963676		0.999874	0.980942	0.983949		0.99806	0.998923	0.981779
5.35588		0.995951	1.00404	0.993308		1.00082	1.00039	1.00293		1.00411	1.00141	0.999667		1.00255	1.00248	0.999325		1.01277	1.00495	1.00183		1.00917	0.99812	1.00051		1.00104	1.00045	1.00053		0.984872	0.9623	0.959698		0.993639	0.977711	0.957531		0.996743	0.986132	0.961386		0.998466	0.977421	0.983762		0.994257	0.998941	0.98337
5.62367		0.999417	1.00082	0.997876		0.998161	1.00039	1.00066		1.003	1.00142	1.0019		1.00584	1.00084	0.998911		1.01051	1.0019	0.996863		1.00925	1.00228	1.00006		1.00458	0.99848	1.0022		0.985595	0.96666	0.960293		0.991287	0.984451	0.963384		0.995844	0.988017	0.966794		0.998142	0.991515	0.980496		0.993346	0.994474	0.972791
5.89146		0.992639	0.999589	1.00016		0.997152	0.999978	1.00112		1.00299	1.00142	1.00459		1.00153	1.00043	1.00143		1.01111	1.00449	0.998248		1.00449	1.00015	1.0023		1.00345	1	0.998063		0.986734	0.971023	0.967746		0.989886	0.981509	0.964117		0.9954	0.988912	0.965086		0.998191	0.981907	0.989361		0.990373	0.994195	0.980766
6.15926		0.992601	1.00082	0.995596		0.998758	0.999239	0.998397		1.00293	1.0035	1.00058		1.00326	0.998375	1.00101		1.01171	1.00057	1.00596		1.00334	1.00011	1.00005		0.999905	1.00045	0.999724		0.986703	0.973556	0.972199		0.994705	0.986423	0.966238		0.99541	0.984143	0.968152		0.995229	0.988919	0.983593		0.992044	0.994121	0.981508
6.42705		0.99648	1.00327	1.00016		0.998757	0.994837	1.00068		1.00074	1.00349	1.00059		1.00533	1.00251	0.99934		1.01117	1.00184	0.998251		1.00577	0.998035	0.998698		1.00402	1.00188	1.00097		0.983699	0.97613	0.976354		0.993342	0.983416	0.969088		0.994582	0.989859	0.971096		0.997419	0.992454	0.983475		0.993108	0.994047	0.975033
6.69484		0.995994	0.99991	1.00244		0.998843	0.998255	0.9975		1.00133	1.0014	0.999694		1.00466	1.00366	1.0006		1.0076	1.00229	1.00143		1.00688	1.00004	0.996448		0.999945	0.999856	1.00014		0.983225	0.974344	0.977074		0.994418	0.986374	0.971996		0.991615	0.985112	0.970984		0.995894	0.983681	0.990888		0.991087	0.994177	0.983634
6.96264		0.994874	1.00437	0.997877		1.00195	1.00257	1.00343		0.999612	1.00141	0.998369		0.999886	1.00377	1.00186		1.01275	1.00183	1.00416		1.00272	1.00413	0.997796		1.00231	1.00237	0.997251		0.981717	0.974392	0.97856		0.995456	0.987266	0.970445		0.991287	0.990789	0.972318		0.993547	0.987171	0.986753		0.988672	0.998495	0.977295
7.23043		0.998777	1.00083	0.99788		1.00197	0.999561	1.0016		1.00069	1.0014	1.00463		1.00434	1.00047	1.00186		1.00926	1.00572	0.999621		1.00448	0.999968	1.00005		1.01102	1.00531	1.00015		0.985577	0.980407	0.977566		0.995982	0.990071	0.974301		0.99148	0.982227	0.978523		0.996664	0.983749	0.991594		0.988239	0.998421	0.97955
7.49823		0.993687	0.997202	1.00016		1.00356	1.00385	1.00298		1.00351	1.00139	1.00284		1.00399	1.00007	0.99893		1.01333	1.00353	1.00326		1.0092	1.00209	0.9996		1.00578	1.00038	1.0014		0.985068	0.977784	0.985176		0.99281	0.979645	0.978856		0.990631	0.991724	0.97449		0.996756	0.992396	0.992253		0.987969	0.993763	0.980346
7.76602		1.00449	1.00203	1.00473		1.00307	0.997859	0.998888		1.00688	1.00555	1.00152		1.00403	1.00008	1.00019		1.0127	1.00311	1.00055		1.00754	0.997814	1.00095		1.00691	1.0038	1.00015		0.986126	0.979461	0.986405		0.991476	0.989058	0.982161		0.988791	0.986019	0.975949		1.00012	0.991692	0.991385		0.990468	0.989283	0.987032
8.03381		1.00329	0.999211	1.00016		0.999863	0.996553	0.998439		1.00239	0.999291	0.999747		1.00752	0.999668	0.998936		1.01449	1.00396	1.00148		1.01225	1.00193	1.00229		1.00875	1.00128	1.00016		0.989119	0.975096	0.983002		0.991468	0.989079	0.979111		0.990468	0.988852	0.980536		0.997145	0.98906	0.992109		0.989525	0.993602	0.982654
8.30161		1.00725	0.999717	1.00244		1.00308	0.997407	1.00073		1.00849	1.00138	1.00288		1.00927	1.00423	0.998524		1.01739	1.0005	1.00057		1.01162	1.00194	1.00094		1.0076	1.00625	1.00099		0.988653	0.981227	0.990606		0.9925	0.989141	0.984388		0.989033	0.989781	0.984218		0.995594	0.994374	0.989605		0.987115	0.989238	0.985488
8.5694		1.00726	0.998421	0.995595		1.00898	1.00255	0.997992		1.00567	1.00137	1.00244		1.0116	1.003	1.00271		1.01796	1.00481	1.00327		1.01944	1.00602	0.997343		1.01178	1.00724	1.001		0.99085	0.982009	0.984214		0.992637	0.989085	0.985003		0.991092	0.985973	0.979395		0.998402	0.995249	0.992832		0.9897	0.993453	0.981562
8.83719		1.00003	1.00287	0.99788		1.00471	1.00206	0.999366		1.00457	1.00345	1.00334		1.01392	1.00135	1.00062		1.01502	1.00739	1.00467		1.01648	1.0081	0.999143		1.0089	1.00423	0.997284		0.993019	0.978471	0.988797		0.98762	1.00062	0.990281		0.98819	0.997378	0.986951		0.994573	0.995295	0.990322		0.988276	0.988798	0.987813
9.10499		1.0073	1.00003	0.997881		1.00472	0.995379	1.00119		1.00181	1.00137	0.999322		1.01448	1.00569	1.0023		1.01204	1.00174	0.999652		1.01601	1.0039	1.00094		1.01014	1.00373	0.998118		0.989835	0.978546	0.996134		0.990064	0.984316	0.988694		0.989792	0.999253	0.987849		0.992143	0.994422	0.988552		0.987376	0.988724	0.982361
9.37278		1.00849	0.998507	1.00016		1.00112	0.999572	1.0012		1.00235	1.00136	1.00022		1.01226	0.998882	1.00021		1.01673	1.00519	0.999686		1.01838	1.00385	1.00183		1.00594	1.0017	1.00183		0.989599	0.975937	0.994191		0.987173	0.990929	0.990105		0.988417	0.991651	0.993937		0.991779	0.997096	0.987775		0.987472	0.979564	0.97878
9.64058		1.0046	1.00247	1.00245		1.00325	0.999667	0.99757		1.00181	1.00344	1.00024		1.00485	1.00013	1.00231		1.01266	1.00258	0.9997		1.01358	1.00173	0.998688		1.00483	1.00272	1.00143		0.984477	0.976801	1.00243		0.985298	0.985173	0.99685		0.986003	0.990677	0.994855		0.990222	0.999743	0.992536		0.986	0.988577	0.983464
9.90837		0.996635	1.00126	0.997882		1.00374	1.0013	1.00167		1.00241	0.999276	1.00293		1.00487	0.997663	1.00189		1.01654	1.00429	1.00375		1.01128	1.01002	1.00094		1.00601	1.00364	0.998546		0.984605	0.973252	1.00318		0.986884	0.995739	0.9961		0.989587	0.991617	1.00029		0.988589	0.999762	0.992438		0.986669	0.983906	0.981149
10.1762		1.0051	1.00279	0.997882		1.00009	1.00087	1.00122		1.00351	0.999272	1.00159		1.00092	0.999321	1.00231		1.01023	1.00601	1.00515		1.013	0.999605	1.00139		1.00898	1.00167	1.0002		0.984621	0.979315	0.998073		0.982682	0.998541	0.991706		0.986606	0.991581	1.00556		0.987727	1.00152	0.989168		0.984632	0.983833	0.978378
10.444		0.999453	1.00046	0.99788		0.99955	0.997101	0.995759		1.00289	1.00343	0.998472		1.00424	1.00222	1.00357		1.01082	1.00081	1.00016		1.01007	0.999571	1.00048		1.00545	1.00411	1.00185		0.98147	0.977574	1.00198		0.981347	0.995687	0.997444		0.982878	0.996326	1.00411		0.984807	0.998886	0.996475		0.985286	0.98376	0.978469
10.7118		1.00287	1.00087	1.00245		0.998445	1.00216	1.00305		1.00231	1.00134	1.00295		1.00445	1.00058	1.0019		1.01382	0.999497	0.998354		1.01132	0.999544	1.00048		1.00839	1.00655	0.999794		0.979984	0.981823	1.00106		0.982318	0.997605	0.996721		0.984961	0.998177	1.0109		0.987331	0.995404	0.994066		0.983297	0.98808	0.978986
10.9795		1.00238	1.00005	1.00017		0.9986	0.997862	0.999867		1.00572	0.99926	1.00206		1.0039	0.997279	1.00148		1.01374	0.998592	0.999718		1.00961	0.999578	1.00048		1.00841	0.999569	1.00145		0.984479	0.983554	0.999376		0.986632	0.99177	0.998843		0.985047	0.998222	1.00459		0.989953	1.00244	0.991606		0.981892	0.992604	0.980024
11.2473		1.00072	1.00127	0.997882		0.99967	0.999582	1.0017		1.00352	1.00134	1.00207		1.00395	0.996458	0.999389		1.01204	1.00119	1.00609		1.0114	0.999469	0.998233		1.00551	1.00113	0.997741		0.982938	0.979236	1.00345		0.983363	0.988909	0.999576		0.985662	0.999867	1.00508		0.990079	1.00157	0.985718		0.980978	0.99253	0.982898
11.5151		0.998472	0.99794	1.00017		0.999204	1.0013	0.997605		1.0052	1.00341	1.00164		1.0034	0.998121	1.00065		1.01202	1.00161	1.00474		1.00952	1.00149	1.00048		1.01082	1.00404	0.998982		0.982842	0.980946	0.989979		0.983964	0.991743	0.994287		0.988722	0.997225	1.00579		0.987602	0.9981	0.984068		0.983585	0.983581	0.982974
11.7829		1.01141	1.00006	1.00017		1.00085	0.999154	0.998981		1.00798	1.00549	0.999406		1.00743	1.0002	1.00149		1.0202	1.00117	1.00065		1.01201	0.999433	1.00003		1.00384	1.00651	0.998985		0.986393	0.985273	0.99493		0.985846	0.994609	0.992026		0.984318	0.990564	0.999527		0.987254	1.00162	0.983285		0.983169	0.992384	0.98604
12.0507		1.00295	0.999167	1.00245		1.00454	1.00045	1.0008		1.00737	1.00341	1.0012		1.00972	1.00062	0.998979		1.01901	0.999856	1.00111		1.01672	0.999367	1.00407		1.00857	0.999085	0.998989		0.983029	0.984375	1.00311		0.985037	0.996426	0.99806		0.988459	0.992442	1.0002		0.990345	1.00163	0.981553		0.988304	0.978957	0.98353
12.3185		1.0008	0.99927	0.997881		1.00674	0.998305	1.00127		1.00851	1.00341	0.997637		1.01588	1.00146	0.999401		1.01972	0.999849	1.00156		1.01618	1.00354	0.99867		1.01216	1.00399	0.998991		0.989253	0.978262	0.996651		0.984133	0.988832	0.996471		0.986034	0.996235	0.998646		0.985501	1.00165	0.98316		0.986356	0.987736	0.979583
12.5863		1.00042	0.996841	0.995602		1.0035	1.00301	1.00127		1.01129	1.0034	0.998542		1.01032	1.00477	1.00024		1.01849	0.999828	0.998839		1.01618	1.00556	1.00002		1.0086	0.999553	0.998999		0.980427	0.98171	1.0011		0.986226	0.995495	0.9992		0.984176	0.999082	0.993789		0.988634	0.997309	0.979041		0.987374	0.996859	0.978026
12.8541		1.00427	0.999271	0.997885		1.00727	1.00003	0.999916		1.0107	1.00339	1.00212		1.0116	0.99899	0.999824		1.02017	1.00284	1.00384		1.01859	1.00761	1.00137		1.0104	1.00001	1.00437		0.986264	0.986908	0.993081		0.984584	0.999356	0.991854		0.984789	0.999045	0.993625		0.988207	1.00169	0.979823		0.986392	0.992369	0.977179
13.1219		1.00319	0.997247	1.00017		1.00155	0.999166	1.00084		1.00792	1.00339	1.00124		1.01391	0.998583	0.999411		1.01958	1.00329	0.997963		1.01272	1.00339	0.999119		1.01165	1.00147	0.999409		0.981001	0.98689	0.995203		0.986376	1.00126	0.994765		0.98585	1.00572	0.998415		0.988911	0.999071	0.984519		0.984185	0.99669	0.969112
13.3897		1.00154	0.999966	0.995599		0.999417	1.00088	1.00037		1.00965	1.00131	1.00303		1.00884	0.99859	1.00151		1.01673	1.00022	1.00066		1.00806	1.00546	1.00047		0.999267	1	0.996946		0.981288	0.989482	1.00344		0.983144	1.00411	0.99461		0.990437	1.01231	0.995032		0.987704	1.00173	0.981134		0.984688	0.996698	0.975259
13.6575		1.00667	1.00009	0.997884		0.998469	1.00217	0.994937		1.00185	1.0013	0.997233		1.00215	0.999013	0.998579		1.01376	1.00109	1.00158		1.00808	1.00127	0.999118		0.996329	0.994533	0.998604		0.983835	0.987694	0.999969		0.985569	1.00503	0.987825		0.985041	1.00564	0.993383		0.985843	1.00536	0.982026		0.983876	0.996544	0.977608
13.9253		0.996938	0.995237	1.00017		0.991618	1.00217	1.00039		1.00191	1.00338	1.00082		0.997655	0.994886	1.00026		1.01032	1.0028	1.00615		0.999271	1.00329	1.00406		0.995225	0.998432	0.99655		0.979809	0.988547	0.992451		0.98475	1.00597	0.993058		0.98372	1.00467	0.995339		0.986953	1.00892	0.978867		0.982068	0.992076	0.978442
14.1931		0.990429	0.996043	1.00017		0.993774	0.9966	0.994934		0.997526	1.00129	1.00038		0.998333	0.99738	0.999425		1.00745	1.00062	1.00615		0.997634	1.00119	0.995519		0.995276	0.9994	1.00109		0.98313	0.994527	0.998127		0.988223	1.00784	0.986309		0.981344	1.01039	0.992926		0.985606	1.00628	0.983733		0.981702	1.00097	0.975336
14.4609		0.989921	1.00252	1.00017		0.990667	0.99711	0.998133		0.998651	1.00337	1.00172		0.994358	1.00028	0.998585		1.00327	1.00103	0.999813		0.991097	1.00318	1.00002		0.989946	0.998411	1.00027		0.980922	0.992777	0.99477		0.985882	1.00882	0.989291		0.980414	1.01417	0.994524		0.983642	1.00542	0.982828		0.985645	0.996502	0.977519
14.7287		0.99389	1.0009	1.00017		0.986434	0.994437	1.00269		0.996433	1.00545	1.00173		0.994441	0.99946	0.99901		0.998729	1.00233	0.998495		0.992374	1.00112	0.999561		0.987675	0.999365	0.996962		0.983414	0.987536	0.995406		0.988395	1.0078	0.990589		0.983929	1.01701	0.995291		0.985411	1.00366	0.985311		0.983346	1.00522	0.979071
14.9965		0.987108	0.997655	1.00473		0.986492	0.998311	1.00043		0.999857	1.00337	1.0004		0.999002	0.998226	1.00153		0.998151	0.997555	0.999406		0.992931	0.998992	0.999114		0.989986	1.00131	0.996972		0.980346	0.997062	0.990656		0.989482	1.01066	0.989175		0.984524	1.0132	0.995895		0.985499	1.00544	0.986956		0.984936	1.00075	0.983003
15.2642		0.995493	0.998483	1.00245		0.988133	0.998292	1.0027		0.997083	1.00128	1.00175		0.996221	0.995753	1.00069		1.00049	1.00273	1.00347		0.994192	0.998953	1.00001		0.991833	1.00034	0.999458		0.979435	1.00052	0.992868		0.985702	1.00874	0.989098		0.984182	1.01321	0.995749		0.984046	1.00201	0.98282		0.982656	1.00068	0.98536
15.532		0.996153	1.00293	1.00017		0.986464	1.00206	0.999066		1.00208	1.00335	1.00399		0.998426	1.00073	1.00111		0.999844	1.00011	1.003		0.99778	1.00723	0.99956		0.992415	0.999315	0.999048		0.982614	0.993531	0.992569		0.986714	1.0058	0.989625		0.984353	1.01128	0.99577		0.988668	1.00376	0.984339		0.985639	0.996005	0.977355
15.7998		0.994376	0.997665	0.995602		0.988596	1.0026	0.996334		0.994873	1.00127	1.00043		0.995658	1.00073	0.99986		0.997528	0.999699	1.00529		0.999556	1.00301	1		0.992443	1.00079	1.00029		0.981233	0.990929	0.994207		0.988224	1.00577	0.985083		0.984856	1.01411	0.995807		0.988264	1.00555	0.988333		0.985316	1.005	0.986113
16.0676		1.00171	0.99727	1.00017		0.990216	1.00046	0.999077		0.999337	0.999185	1.00222		1.00195	0.998672	0.999864		0.999366	1.0027	1.00527		1.00382	0.998869	0.999102		0.997151	0.997299	1.00195		0.979577	0.983124	0.996637		0.989753	1.00671	0.987321		0.983445	1.00842	0.996235		0.989956	1.00032	0.987625		0.983788	1.00505	0.987805
16.3354		1.00231	1.00041	1.00245		0.995542	1.00089	1.00045		0.999422	0.999172	1.00446		1.00261	1.00158	1.00112		1.0017	1.004	1.0008		1.01141	1.00507	1.00226		0.999582	1.00269	0.999895		0.982011	0.992579	0.991645		0.989806	1.00669	0.989592		0.984469	1.00269	0.996865		0.98857	1.00557	0.987547		0.984084	1.00505	0.991648
16.6032		1.00406	1.00213	1.00017		0.996123	0.997026	0.998183		1.00214	1.00542	0.999557		1.00259	1.00117	1.00196		1.00285	1.00139	1.00439		1.01038	1.00296	1.00135		0.999046	0.997742	0.99783		0.978447	0.996075	0.999704		0.989419	1.00378	0.992523		0.98413	1.0141	0.998216		0.987096	0.998527	0.985065		0.982217	1.00491	0.993155
16.871		0.997323	0.996877	1.00245		0.991964	0.99661	0.999547		1.00326	0.999173	1.00135		1.00501	0.999526	1.00155		1.00581	1.00918	0.998073		1.01216	1.005	0.997749		1.01146	0.99777	1.00155		0.976229	0.997828	0.993876		0.990889	1.00661	0.989385		0.983625	1.00648	0.997284		0.989354	1.00125	0.987395		0.984295	1.00483	0.994626
17.1388		1.01027	0.993749	1.00017		0.997265	0.999185	1.00139		1.00439	1.00125	1.00136		1.0062	0.998711	0.999036		1.00466	1.00179	1.00215		1.01634	1.00085	0.999549		1.01034	0.997231	1.00073		0.982245	0.999479	0.996179		0.99097	1.01046	0.990152		0.98368	1.01599	1.00099		0.989796	0.998599	0.984933		0.982925	1.00936	0.989135
17.4066		1.00358	1.00053	1.00246		1.00052	0.999182	0.999111		1.00219	0.999165	1.00181		1.00617	1.0012	1.0003		1.00513	1.00526	1.00398		1.0134	1.00706	0.999999		1.0121	1.00166	0.998248		0.981207	0.996853	0.995445		0.99243	1.01399	0.99396		0.982339	1.01311	1.00399		0.990334	1.00307	0.989009		0.985819	1.00915	0.987406
17.6744		1.00866	0.997285	0.995607		0.999512	0.999177	1.00321		1.00546	1.00124	1.00138		1.0124	0.997067	0.99946		1.0064	1.00047	0.998999		1.01875	0.998663	0.996852		1.00918	0.995231	1.00073		0.978476	0.992462	0.991935		0.992967	1.01235	0.993014		0.982321	1.02095	1.00008		0.988413	1.00933	0.989813		0.982039	1.00461	0.993922
17.9422		1.00871	0.998905	1.00245		1.00062	0.998314	0.997756		1.00501	0.999149	0.998259		1.00849	1.00039	0.999046		1.00925	1.00653	0.998084		1.01939	1.00693	1.0009		1.01396	0.998187	0.996193		0.982033	0.995049	0.994393		0.987781	1.01034	1.00125		0.982976	1.01404	1.00612		0.988484	1.01025	0.992292		0.982051	1.00454	0.994588
18.21		1.00649	0.994862	1.00017		0.999056	1.00132	1.00096		1.00446	0.997057	1.00094		1.00802	0.999565	1.00156		1.00992	1.00045	1.00538		1.02246	0.99862	0.999097		1.00929	1.0036	1.00075		0.978632	0.997637	0.996809		0.991616	1.01415	0.999724		0.984508	1.01686	1.00761		0.991956	1.0023	0.995475		0.986555	1.0045	0.99781
18.4778		1.00706	0.999713	1.00017		0.99963	1.00262	0.999585		1.0006	1.0033	0.999604		1.00979	0.999163	1.00031		1.01004	1.00087	1.00402		1.02371	1.00274	1.00134		1.00751	1.00207	1.00322		0.979012	0.995062	0.995863		0.990265	1.00838	0.998851		0.984156	1.01875	1.00512		0.987224	1.00506	1.00286		0.983036	0.995436	0.99773
18.7456		1.0015	0.998095	1.00017		0.996062	0.998752	0.999136		0.997863	1.0033	1.00096		1.00874	0.999996	0.999893		1.00948	1.00257	0.997238		1.01259	0.996458	0.996844		1.00638	0.997121	0.999928		0.980401	0.999419	0.995702		0.986968	1.01123	1.00416		0.982345	1.0273	1.01057		0.991763	1.00505	0.996159		0.986678	0.995364	0.996053
19.0134		1.00213	0.997294	0.997889		0.993976	1.00091	1.00007		0.99515	1.00329	1.00142		1.00599	0.996281	1.00157		1.00308	1.00126	1.00311		1.01443	0.998518	1.00179		0.998774	0.99756	1.00365		0.982984	0.999359	0.998163		0.99233	1.0112	1.00856		0.983273	1.02063	1.00343		0.990815	1.00684	1.00362		0.987044	1.00428	0.997844
19.2812		0.994306	0.996483	0.997887		0.988758	1.0039	1.00189		0.993511	1.0033	1.00411		1.00164	1.00126	0.999061		1.00081	1.00428	0.998111		1.00617	0.996349	1.00089		0.998202	0.996582	1.002		0.981151	1.00024	1.00041		0.99146	1.01114	1.01016		0.984392	1.01777	1.00514		0.992498	1.00329	0.998714		0.98628	0.999674	1.00474
19.5489		0.994433	1.00327	0.99789		0.987179	1.00262	0.998703		0.989571	0.997046	0.998294		0.997099	0.995886	1.00074		0.994931	0.99992	0.998583		1.00156	0.998427	0.996389		0.993609	0.998543	0.998702		0.982285	1.00367	0.997084		0.992366	1.01377	1.01453		0.984873	1.02253	1.00828		0.990116	1.00337	1.00519		0.989441	0.999745	1.00372
19.8167		0.98824	0.999018	1.00017		0.981985	1.0009	1.00327		0.986355	1.00328	1.00278		0.993136	1.00086	1.00033		0.988075	1.00078	1.00268		0.998729	1.00048	0.997287		0.987178	1.00244	1.00077		0.981424	1.00191	0.999282		0.990678	1.01209	1.01766		0.98109	1.02252	1.00954		0.99132	0.998038	1.00419		0.992491	1.00413	0.99672
20.0845		0.991652	0.999333	0.995606		0.979459	0.999185	1.00145		0.980241	0.992871	1.00235		0.989811	0.995075	0.998649		0.990399	1.00035	1.00632		0.989326	0.996246	0.998637		0.987189	1.00146	1.00077		0.978235	1.00884	1.00257		0.993039	1.00558	1.01452		0.980102	1.01964	1.01181		0.987909	1.0043	1.00438		0.992222	0.995205	1.01155
20.3523		0.985478	0.999234	0.99789		0.976868	0.998325	0.998261		0.977504	0.997034	1.00012		0.985937	0.99839	0.998655		0.986866	1.00339	0.99634		0.984654	1.00452	0.996835		0.983104	0.99698	0.999117		0.984316	1.00106	1.00065		0.991733	1.01012	1.01748		0.98076	1.01583	1.01185		0.991592	0.998982	1.00328		0.992197	1.00392	1.00198
20.6201		0.983693	1.00297	0.995608		0.974741	0.999177	0.998727		0.975311	1.00327	1.0028		0.983688	0.996746	1.00159		0.98444	1.00291	1.00677		0.986856	0.998302	1.00134		0.982017	1.00237	0.999539		0.983646	1.00363	0.998919		0.987601	1.011	1.01663		0.982491	1.01772	1.00934		0.990406	1.00685	1.005		0.98975	1.00402	0.998567
20.8879		0.981041	0.997711	1.00017		0.975307	0.994451	0.996455		0.972442	0.999106	0.996563		0.980865	0.995934	0.99866		0.979735	1.00465	0.99816		0.978622	1.00029	0.998183		0.9814	0.997456	0.999134		0.980922	1.00446	1.00517		0.989633	1.00719	1.01819		0.982959	1.0139	1.01406		0.993444	1.00437	1.00837		0.987917	0.999383	1.01245
21.1557		0.981062	0.996105	0.995606		0.973624	0.996718	1.00329		0.974081	0.99911	0.998797		0.981448	0.992627	1.00202		0.982613	0.999881	1.00177		0.986296	1.00025	0.997736		0.975488	0.996906	0.998723		0.981697	1.00875	1.00757		0.989589	1.01673	1.02107		0.982171	1.01389	1.01389		0.990188	1.00175	1.00732		0.98616	0.999514	1.01597
21.4235		0.972574	0.99741	0.997889		0.975755	0.998	1.00421		0.974667	1.00327	1.00105		0.985496	0.996768	0.999088		0.983188	1.00203	1.00499		0.985016	1.00231	0.995938		0.979548	0.998421	0.999971		0.985752	0.998325	1.00663		0.993506	1.01188	1.01799		0.986243	1.01673	1.00993		0.987129	0.999954	1.00332		0.986013	1.00363	1.01357
21.6913		0.981546	0.998622	1.00018		0.97109	1.00262	1.00057		0.973475	1.00117	0.997921		0.982537	0.996784	0.999926		0.985415	1.00028	0.999566		0.985577	0.998134	0.996829		0.990136	1.00086	1.0008		0.984507	1.00527	1.0047		0.995004	1.01672	1.02177		0.985255	1.01957	1.01376		0.990319	0.998198	1.00799		0.985967	0.999166	1.01576
21.9591		0.986609	0.995899	0.997891		0.977267	0.999626	1.00103		0.977871	1.00326	1.00284		0.984906	0.998452	0.99867		0.986553	1.00115	1.00003		0.986063	1.00015	0.99908		0.985481	1.00029	1.00081		0.984296	1.00439	1.0078		0.993675	1.00708	1.0194		0.986906	1.01765	1.01188		0.990436	0.999102	0.996599		0.984137	0.994698	1.01052
22.2269		0.984199	0.994071	0.99561		0.978259	0.999641	0.996032		0.976228	0.994919	0.995262		0.984917	0.995554	0.997836		0.986894	0.999823	0.997322		0.985441	0.998022	0.999528		0.988323	1.00179	0.999986		0.989541	1.00089	1.01414		0.993704	1.01093	1.01939		0.988375	1.01571	1.00794		0.990051	0.998245	1.00147		0.98466	0.999022	1.01063
22.4947		0.987085	0.999745	0.99561		0.979365	1.00135	1.00014		0.974524	0.999091	1.00152		0.985535	0.995979	0.999933		0.986271	0.998517	1.00275		0.992003	1.00009	0.996823		0.985948	0.997339	0.998339		0.989625	1.00166	1.00362		0.999083	1.00699	1.01784		0.986962	1.01857	1.00691		0.988589	0.998268	1.00308		0.984345	0.99011	1.00914
22.7625		0.988777	0.994082	1.00246		0.97829	1.0035	0.998773		0.975088	0.999079	0.998852		0.985578	0.998881	0.996164		0.993299	0.998494	0.999582		0.988942	1.00009	1.00177		0.988912	1.00275	0.999989		0.987536	0.999963	1.01059		0.993376	1.00979	1.0163		0.98809	1.01951	1.00609		0.989172	1.00006	1.00365		0.983504	0.998674	1.00952
23.0303		0.991222	0.997734	0.995609		0.984215	1.00135	1.00016		0.973426	1.00324	1.00243		0.979861	0.996823	0.999521		0.990947	0.999796	0.998679		0.991308	1.0021	1.00177		0.983614	0.999267	0.999177		0.98675	0.996454	1.01442		0.996441	1.01077	1.02001		0.988745	1.01096	1.00543		0.989783	0.999183	1.00707		0.985486	0.989764	1.01512
23.2981		0.988306	0.998942	1.00017		0.986371	1.00062	0.999246		0.980174	1.00324	1.00066		0.980482	0.996829	1.0012		0.990913	1.00151	1.00683		0.992622	0.997941	0.999518		0.980745	0.993805	0.99918		0.990424	0.998131	1.01194		0.994484	1.00121	1.02288		0.990763	1.00996	1.00673		0.987335	1.00011	1.00367		0.986697	0.989693	1.0158
23.5659		0.984455	0.999251	0.997894		0.984814	1.00265	0.99971		0.97852	1.00115	1.00065		0.98627	1.00139	1.00036		0.987965	1.0028	0.9969		0.993796	0.997924	0.998171		0.984877	0.996791	0.999596		0.988593	0.995524	1.00942		0.995105	1.00309	1.02353		0.990002	1.01756	1.00133		0.989993	1.00103	1.0085		0.987196	0.985225	1.01422
23.8336		0.988862	0.997721	0.997894		0.988619	1.00091	1.00062		0.98408	1.00322	1.00067		0.987485	0.998914	1.0012		0.994494	0.999312	1.00412		0.993875	0.993735	0.999519		0.99083	1.00018	0.998777		0.991703	0.999807	1.01081		0.998071	1.00113	1.02289		0.990616	1.01659	1.00649		0.990411	1.00459	1.00444		0.989333	0.985154	1.00842
24.1014		0.980043	0.999363	0.997892		0.990263	1.00007	1.00109		0.986401	0.994892	1.00157		0.986953	0.997264	0.997856		0.995067	1.00234	0.99779		0.995017	0.997856	0.998615		0.989078	0.999184	0.997541		0.986098	0.998908	1.01712		0.996256	1.00298	1.01744		0.990753	1.02133	1.00717		0.993996	0.99929	1.00915		0.98798	0.989522	1.01237
24.3692		0.989138	0.998138	1.00018		0.9877	1.00308	0.999736		0.991478	0.996975	1.00203		0.989836	0.995207	1.00163		0.992834	1.00582	1.00053		0.996977	0.995726	0.998164		0.991491	0.996708	0.997118		0.985049	0.9963	1.01622		0.994459	0.99429	1.02271		0.994846	1.01943	1.00323		0.997222	1.0011	1.00594		0.987026	0.98945	1.00512
24.637		0.989086	0.998953	0.995611		0.991429	1.00094	0.99973		0.986984	1.00113	0.998906		0.987034	0.998938	1.00289		0.99521	1.00014	0.996916		0.998719	1.00185	0.996818		0.990399	0.999184	0.999613		0.986231	0.99718	1.0103		0.994487	1.00197	1.01503		0.994898	1.02415	1.00846		0.997853	0.999325	1.00831		0.987657	0.998373	1.00734
24.9048		0.991829	0.999373	0.99789		0.988437	1.00437	0.998832		0.98712	1.00113	0.997563		0.987649	0.998534	0.99996		0.991777	0.994048	1.00008		1.00069	0.991493	1.00311		0.992799	0.998638	1.00044		0.985452	0.9954	1.01356		0.995576	1.00265	1.01732		0.995156	1.01844	1.00287		1.00064	0.999376	1.00753		0.987223	0.998138	1.00885
25.1726		0.994868	0.99695	1.00246		0.986278	1.00223	0.99975		0.990419	0.999043	1.0025		0.983214	0.99772	1.0008		0.993042	0.998826	0.999641		0.99894	0.99772	1.00131		0.992325	0.995247	0.997133		0.990816	0.99711	1.01261		0.995164	1.00487	1.01493		0.992672	1.02605	1.00281		0.998636	0.998557	1.00751		0.987872	0.998065	1.00886
25.4404		0.990876	0.994091	1.00017		0.991154	0.999232	1.00157		0.984876	1.00112	0.999824		0.983804	1.00186	1.0008		0.996742	1.00356	0.997364		0.997212	0.995596	0.997262		0.988195	1.00059	0.997147		0.991416	0.998863	1.01556		0.992388	1.00963	1.01412		0.989746	1.01839	1.00272		0.997136	0.995009	1.00432		0.987971	0.989162	1.0151
25.7082		0.995073	1.00099	0.99561		0.988095	1.00051	1.00067		0.988267	0.996956	0.998934		0.985595	0.999382	0.998291		0.994421	1.00139	0.999186		0.999015	0.999695	0.995013		0.991197	0.998137	0.997547		0.987776	0.998759	1.01088		0.994832	1.01031	1.01251		0.986455	1.02031	0.999425		0.998923	0.994153	1.00743		0.987083	0.993523	1.00877
25.976		0.989847	0.999396	0.99561		0.992414	1.00223	0.998394		0.98609	1.00111	1.00252		0.984488	0.997326	0.99997		0.994492	0.9962	0.996019		0.997435	0.999683	1.00131		0.991281	1.00107	0.997562		0.986829	0.999649	1.01143		0.99494	1.00281	1.01331		0.986517	1.0136	0.996916		0.996947	1.00031	1.00569		0.989215	0.988851	1.0086
26.2438		0.985994	0.998377	1.00018		0.986042	0.998796	1.0025		0.992757	1.00319	1.00208		0.989694	0.996098	0.999138		0.991941	1.00008	0.994216		0.99562	0.995494	0.999055		0.996578	0.995593	1.00253		0.988694	0.990911	1.01048		0.993561	1.00479	1.01395		0.988096	1.01525	0.996087		0.996741	0.996851	1.00235		0.991466	1.00237	1.00544
26.5116		0.987698	0.996266	0.997893		0.986612	1.00364	1.0016		0.984962	1.00109	0.998512		0.990857	1.00148	0.999139		0.992723	1.00051	0.996944		0.996278	0.999592	0.998154		0.988355	0.996594	1.00129		0.988163	1.0022	1.01911		0.9971	1.01164	1.00786		0.988327	1.02593	0.993574		0.996398	1.00133	1.00409		0.988468	0.993305	1.00689
26.7794		0.990036	0.997268	0.997893		0.989204	1.00395	1.00069		0.991595	0.99694	0.998972		0.994343	0.999005	1.00208		0.991443	1.00006	0.999678		1.00099	0.995405	1.00175		0.994893	0.99804	1.00295		0.988225	0.996979	1.00713		0.992418	1.00755	1.00556		0.983894	1.02026	0.994407		0.993799	0.992467	1.00315		0.989072	0.988683	1.00672
27.0472		0.994499	0.997795	1.00018		0.987224	1.00267	1.00161		0.988275	0.996936	0.998977		0.995531	0.996117	0.995796		1.00215	0.998744	1.00058		1.00279	1.0016	0.996351		0.996137	0.999485	1.00006		0.992526	0.998706	1.00866		0.991923	1.00658	1.01002		0.987441	1.0193	0.990444		0.994577	1.00315	1.00162		0.991297	0.997556	0.999362
27.315		0.989955	0.995339	0.997898		0.991949	0.998814	1.00071		0.987735	1.00109	0.998534		0.999542	0.999439	1.00041		0.999091	1.00395	0.999231		1.00164	0.999474	1.00085		0.994952	0.995557	0.998002		0.991849	1.00475	1.00772		0.994872	1.00947	1.00456		0.990092	1.02404	0.99347		0.998942	0.999597	0.998185		0.988699	0.993087	1.00177
27.5828		0.992385	1.00061	0.997898		0.990384	0.997949	0.997073		0.994947	1.00109	1.00078		1.00296	1.0011	0.999577		1.00266	1.00003	0.996073		1.00346	0.995356	0.999949		0.997237	0.99697	0.99965		0.986829	1.00562	1.01102		0.996822	1.00267	1.00228		0.992511	1.01643	0.989289		0.992988	1.00408	1.00055		0.988329	0.993014	0.99852
27.8506		0.991833	0.998167	0.997899		0.996235	0.999666	1.00208		0.993801	1.00109	0.999455		1.00243	0.99987	0.99706		1.0032	1.00088	0.997887		1.00948	0.999462	0.999051		1.00027	0.99849	0.99759		0.990119	1.00124	1.01002		0.994396	1.00548	1.00379		0.99159	1.01737	0.986918		0.99709	1.00493	0.999763		0.989352	0.992942	1.0008
28.1183		1.00401	0.997071	1.00474		0.995743	1.00052	1.00026		0.994343	1.00107	0.999007		1.00421	0.995326	1.00084		1.00852	1.00044	1.00199		1.00945	0.997307	1.0013		1.00194	0.997015	0.997185		0.989582	1.00557	1.00757		0.99508	1.01127	1.00299		0.995162	1.01832	0.989967		0.998239	0.996919	0.998914		0.991893	0.992841	0.999243
28.3861		1.00074	0.998904	0.997898		0.995244	1.00182	1.0021		1.00109	1.00107	0.999015		1.00367	0.997393	0.998742		1.00727	1.00041	1.00015		1.01486	0.995225	0.995901		1.00436	0.998899	0.999671		0.991868	1.0082	1.01317		0.999443	1.01316	1.00153		0.993825	1.01831	0.988362		0.999029	1.00239	0.995629		0.996672	0.997193	0.99841
28.6539		1.00013	0.999396	1.00018		0.997372	0.998286	0.997085		0.998832	1.00107	1.00036		1.00371	0.999473	1		1.00672	1.00301	1.00382		1.01429	0.995192	0.9986		1.00495	1.00186	0.999265		0.992	1.00492	1.01139		0.997671	1.00357	1.00137		0.991949	1.024	0.989721		1.0002	1.00674	0.998968		0.997866	0.997121	0.996136
28.9217		1.00137	1.00184	1.00018		0.999881	0.997093	1.00119		0.998262	0.99691	1.00083		1.00376	0.998247	0.996233		1.01185	0.999091	1.00064		1.013	0.99307	0.999046		1.00617	1.00478	1.00133		0.992815	1.00383	1.00715		0.994794	1.00742	1.00061		0.993938	1.01163	0.988912		1.00135	0.999652	0.989854		0.995659	0.997171	0.996039
29.1895		0.997255	0.997001	0.995614		0.995791	0.996658	1.00121		0.998832	1.00106	0.999938		1.0038	0.992872	0.99875		1.00906	0.999927	1.00244		1.01244	0.999285	0.995892		1.00618	1.00091	0.993488		0.991695	1.0011	1.00649		0.998283	1.00444	1.00429		0.996065	1.01828	0.988689		1.00355	1.00243	1.00133		1.003	0.992554	0.995075
29.4573		1.00186	0.996174	0.997894		0.997334	1.00001	1.0053		1.00046	0.998976	0.999045		1.00384	0.999494	1.00043		1.00552	1.00253	1.00066		1.01483	1.00132	1.00084		1.00323	1.00136	1.00093		0.995705	1.00375	1.00618		0.99696	1.00425	0.995866		0.999263	1.01637	0.988048		1.00416	0.997075	1.00045		1.00066	0.997106	0.992724
29.7251		0.999644	0.998286	0.9979		1.00104	0.99409	0.998937		1.00104	1.00105	0.999958		1.00217	0.997443	0.997499		1.00486	1.00251	0.996127		1.00891	1.00123	1.00084		1.00088	0.997374	0.998452		0.99465	1.00458	1.00777		0.996118	1.00244	0.999707		0.998897	1.0173	0.986934		1.00234	0.997918	0.991586		0.999424	0.992614	0.993793
29.9929		1.00249	0.996991	0.997895		1.00216	1.00098	0.997121		0.999965	0.998973	0.998172		0.999348	0.997861	1.00127		1.00298	1.00208	1.0002		1.00768	0.999159	0.996343		0.996164	0.996881	0.998867		0.997797	1.00285	1.00689		0.998138	1.00533	0.996614		1.00043	1.01634	0.986908		1.00909	1.00154	1.00058		1.00201	0.992418	0.983733
30.2607		0.992358	0.996506	1.00247		1.00113	0.998387	1.00078		1.0016	1.00312	1.00132		1.0011	0.999108	0.999181		1.00426	1.00297	1.00384		1.00576	0.994991	0.997687		0.994361	0.99541	1.00052		0.99969	0.995803	1.00701		0.996281	1.0035	0.999484		0.999094	1.00873	0.99223		1.00583	0.998819	1.00131		1.0026	0.996889	0.992364
30.5285		0.997952	1.00145	0.997899		0.997945	0.996778	1.00078		1.00158	1.00521	0.997296		0.998273	1.00201	0.998351		1.00358	0.998593	1.00204		1.00579	0.994939	1.00398		1.00199	0.997845	0.999702		1.00233	0.998433	1.00835		1.00352	0.998584	1.00018		1.00108	1.01537	0.987503		1.00328	0.999895	0.998695		1.00428	0.996797	0.989111
30.7963		0.993527	0.99944	0.995617		0.997995	1.00011	1.00305		1.00047	0.998948	1.00222		0.999933	0.998304	0.999605		1.00431	0.998147	1.00206		1.00516	0.994924	1.00578		0.995704	0.999817	1.00095		1.0016	1.00623	1.00674		1.0004	1.00143	0.997226		0.998846	1.01252	0.988981		1.00387	0.998838	1.00519		1.00447	0.996744	0.982734
31.0641		0.994099	1.00066	1.00246		0.998547	0.997975	0.997607		1.00664	0.998957	0.998662		1.0033	0.997489	1.0017		0.998362	0.999416	0.998872		1.00856	0.999045	1.00039		1.00255	0.997328	1.00096		1.00175	1.00187	1.00594		0.99654	1.00403	1.00306		1.00002	1.0144	0.99104		1.00506	0.995481	0.993042		1.00404	0.996672	0.993647
31.3319		0.998531	0.997427	0.995619		1.00327	0.994204	0.998517		1.00613	0.994786	1.00134		1.00332	1.00162	1.00213		1.00079	1.0003	1.00434		1.00784	0.998973	1.00038		0.996523	0.996788	0.99848		1.00396	1.00445	1.00881		1.0009	1.00621	1.00079		1.00204	1.0163	0.990201		1.00514	0.994583	1.00031		1.00193	1.001	0.984931
31.5997		0.996318	0.997806	1.00018		1.00156	0.996798	0.999435		1.00771	1.00102	1.00135		1.00334	1.00163	1.00046		1.00185	1.00115	0.999787		1.01385	0.998997	0.993183		1.00008	0.996275	0.999307		1.00119	0.999223	1.00879		0.99667	0.988453	1		1.00026	1.00961	0.98217		1.00262	0.998081	0.998568		1.00161	1.00093	0.991952
31.8675		1.00097	0.994684	1.00018		1.00468	1.00313	0.999898		1.00933	0.996866	1.00226		1.0051	1.00041	1.00129		1.00531	1.00159	0.99439		1.01317	0.998993	0.998127		1.00057	0.998228	0.998482		1.00245	0.994819	1.01099		1.00101	1.0003	0.999871		1.00029	1.01436	0.989924		1.00426	0.991057	0.998617		1.00159	0.996441	0.986978
32.1353		0.993447	0.997816	1.00018		1.00311	0.99756	0.998994		1.00711	1.00102	0.999137		1.00055	0.996273	0.9992		1.00644	1.00026	1.00027		1.01025	0.996836	0.996786		1.00657	0.997184	0.999729		0.998328	1.00004	1.00789		0.997252	0.997462	1.00452		0.998308	1.01055	0.992718		1.00434	0.992878	1.00007		1.00124	0.987371	0.990961
[truncated: 48 more columns]

## Sheet: Fig5-1_E,F
Tims (s)		Individual Penetrating Arteries						Individual Surface Arteries
-7.5		1.00229	1.00678	0.992714	1.00329	0.997928		0.997324	1.00056	1.00241	1.00486	1.00109	1.00174	0.998436	1.00177	0.999435	0.999486	1.00346	0.999517	0.998357	1.0051	1.00294	1.00157	1.00227	1.0025	1.00133
-6.5		0.999146	0.989019	1.02136	1.00383	0.994586		1.00137	0.998588	0.999535	1.011	0.99997	1.00057	0.991129	1.00094	0.998744	1.00043	1.00285	1.00031	0.999372	0.997799	0.999528	0.997051	0.999776	0.99819	1.00109
-5.5		0.999918	0.989396	1.0098	1.00118	1.00038		1.00075	1.00286	1.00128	1.00646	1.002	0.999053	1.00618	1.00101	0.994626	0.999841	0.998201	0.996267	0.998795	1.00592	1.00318	0.99643	0.999051	0.997417	0.999284
-4.5		0.999899	1.00773	1.0112	1.00103	1.00153		1.00133	1.00091	0.998732	1.01139	1.00046	1.00021	1.01203	1.00019	0.995812	0.997961	0.997521	0.999471	0.999116	1.00559	1.00096	0.996655	0.997189	0.998921	0.998875
-3.5		1.00029	1.01659	0.998461	0.99758	1.0004		0.998843	1.0025	0.99929	1.00731	1.00054	1.00055	1.00485	1.00022	0.995425	1.00218	1.00181	0.997911	0.999027	0.994614	1.00206	0.997079	0.999472	0.99891	1.00054
-2.5		1.00045	0.99917	1.00208	1.00254	0.998936		0.998567	1.0008	0.999602	1.01131	1.00075	1.00028	1.00659	0.999647	1.00079	0.99936	0.999781	0.999711	1.00035	0.997889	0.998231	0.999407	1.00193	0.997378	0.999994
-1.5		1.0008	1.00009	1.0012	1.00175	1.00296		1.00209	0.998759	1.00117	1.00715	0.998599	1.00056	1.0028	1.00028	1.00058	0.998814	1.00014	0.999577	0.999777	1.00656	0.997494	1.00162	0.998927	1.00117	1.00021
-0.5		0.999743	0.986361	1.00119	0.993397	0.99775		0.998937	0.997886	0.9995	1.01029	1.00128	0.999924	1.00402	1.00091	1.00259	1.00069	0.998885	1.00069	1.00088	0.999822	1.00398	0.999568	0.999229	1.00245	0.999316
0.5		1.00022	0.986648	0.987187	0.999004	0.998764		1.00179	1.00122	1.00281	1.009	1.00039	0.996916	0.99782	0.998455	1.00313	0.999174	1.00007	1.00287	0.999506	0.996809	0.997633	1.0008	0.998168	0.999682	0.99863
1.5		0.995844	0.979673	1.01187	0.997135	1.00187		1.00075	1.00037	1.00175	1.0051	0.998184	0.997999	1.0034	0.998187	0.996218	0.997227	0.999454	0.999026	1.00071	1.00316	1.00178	1.00322	1.00229	0.997424	1.00113
2.5		0.996365	0.99219	1.00169	0.99634	1.00068		0.997686	0.998221	0.998706	1.01176	0.998332	0.998751	0.990021	0.999212	0.996876	0.999198	0.999352	1.00105	0.999831	1.0064	1.0008	1.00644	0.995766	1.00047	0.998817
3.5		0.999255	0.989649	0.999746	0.996984	1.00088		1.00043	0.998473	1.00031	1.01032	0.999936	0.998511	0.991764	0.997872	0.995122	1.00263	0.997329	1.0011	1.00059	0.998582	0.996626	1.00148	0.9972	1.00124	1.00069
4.5		0.99673	0.993296	1.00716	0.999451	0.997044		0.999243	0.9986	0.99769	1.00219	0.998837	0.998155	1.00471	0.99793	0.999628	0.999521	0.996947	1.00045	1.00046	0.997188	0.997467	1.00088	0.999084	1.00126	1.00202
5.5		1.0003	0.987564	1.00287	0.999371	1.00081		1.00062	0.997969	0.997813	1.00123	0.996595	0.997864	0.992328	0.999352	1.00087	1.00107	0.999267	1.0008	0.999776	1.00354	1.00016	1.00182	0.999651	1.00152	0.997138
6.5		0.998266	1.00123	1.00618	0.999837	0.998333		1.00219	0.997418	0.997589	1.00801	0.999828	0.998546	1.00286	0.998904	0.994743	1.00253	0.999516	0.999861	1.00064	1.00246	0.999144	0.999935	0.998723	1.00053	1.00046
7.5		0.998081	1.00261	1.01471	1.00265	0.996588		1.00035	1.00131	0.997757	1.0024	0.996283	0.996642	1.00791	0.999446	0.998156	1.00398	0.996137	0.999025	1.00095	0.994252	0.99874	1.00007	0.996518	1.00282	0.99825
8.5		0.997272	1.02066	1.00533	1.00524	0.998258		0.996029	1.00266	1.00055	1.00489	1.00035	0.997498	1.00257	0.999344	0.995773	1.00195	1.00242	1.00015	1.00141	1.00312	1.00134	1.00148	0.998148	0.999043	0.9995
9.5		1.0023	0.983839	0.991394	1.00554	0.997915		1.00065	0.998551	1.00043	1.00771	0.996986	0.998689	1.00404	0.998916	1.00008	1.00004	0.998768	0.9995	1.00068	1.00487	1.00016	1.0018	0.999431	1.00209	1.00131
10.5		0.999807	0.983511	1.00163	1.00214	1.0041		0.998189	0.999487	1.00246	1.00708	1.00028	NaN	NaN	1.00102	0.997178	0.997694	0.992631	1.0032	1.00163	1.00457	1.00162	0.997946	1.00308	1.00261	0.999298
11.5		1.00096	0.99799	1.00605	0.996477	0.999163		0.999361	1.00028	0.998799	1.00472	0.999978	NaN	NaN	0.999676	0.996428	1.00113	0.997106	1.00102	1.00189	1.00166	0.999083	1.00051	1.00092	1.00061	0.998098
12.5		1.00128	0.997837	1.01756	0.999296	1.00855		1.00101	1.00114	0.999899	NaN	NaN	NaN	NaN	1	0.994292	1.0006	0.998307	0.999307	1.00087	0.994415	0.998938	0.997051	1.00221	1.00138	0.998344
13.5		0.999921	0.992888	0.998135	0.998929	1.0037		1.0017	1.00333	1.00066	NaN	NaN	NaN	NaN	0.999413	0.993734	0.998818	0.993768	1.00185	1.00133	1.00527	0.998282	1.00498	0.999122	0.996855	0.998365
14.5		1.00198	0.987847	1.01967	1.00119	0.999284		1.00209	1.00238	1.00076	NaN	NaN	NaN	NaN	0.998986	0.992619	1.0002	0.99898	1.00014	1.00089	1.00514	1.00075	1.00237	1.00202	1.00217	0.996494
15.5		1.00018	1.00015	1.01198	1.00001	1.00091		1.00171	1.00247	1.00117	NaN	NaN	NaN	NaN	1.0001	1.00187	1.00026	0.997269	1.00209	1.00111	1.00494	0.999393	1.00793	1.00101	1.00067	0.997837
16.5		0.998023	0.996495	1.00605	0.998318	1.00248		0.998908	1.00119	1.00164	NaN	NaN	NaN	NaN	1.00011	0.993049	0.998238	0.998926	1.00149	1.00286	1.00618	0.999776	1.00051	1.00271	1.00144	0.996072
17.5		1.00305	0.995093	1.0052	0.999854	0.999319		0.998995	1.00156	1.00067	NaN	NaN	NaN	NaN	1.00029	1.00002	0.996973	1.00114	1.00031	1.00034	0.999516	0.996803	1.00473	1.00067	0.999943	0.998592
18.5		0.998171	0.999908	0.997246	0.997088	0.997823		0.999995	1.00425	0.999305	NaN	NaN	NaN	NaN	1.00116	0.994173	0.999753	0.994043	1.00214	1.0008	1.00479	0.997155	1.00073	1.00214	0.99844	0.99784
19.5		1.00187	1.00465	1.00992	0.994416	1.00014		1.00172	1.0062	0.998717	NaN	NaN	NaN	NaN	1.00079	0.992866	1.00063	1.00041	1.00044	0.999621	0.999547	0.999553	1.00198	0.999108	1.00073	0.999837
20.5		0.998363	1.0118	0.989398	0.997239	1.00094		1.00286	1.00286	0.998022	NaN	NaN	NaN	NaN	1.00005	0.999406	1.00134	1.00025	1.00144	1.00217	1.00122	0.996131	0.99804	1.00257	1.0058	0.999589
21.5		1.00246	0.975246	1.00404	0.996422	1.00093		0.998781	1.00295	1.00108	NaN	NaN	NaN	NaN	0.99896	0.996707	1.00006	0.998233	1.00019	1.00084	1.00368	0.999705	1.00222	1.00103	1.00228	1.00018
22.5		1.01131	0.998589	1.01996	1.00235	0.999991		0.999653	1.00103	1.0011	NaN	NaN	NaN	NaN	0.999663	0.994625	0.99928	0.997369	1.00237	1.00115	1.00218	1.00088	0.999898	1.00083	1.00305	0.999349
23.5		1.00255	0.997146	1.00066	1.00165	0.999799		1.00083	1.00262	0.999749	NaN	NaN	NaN	NaN	0.999236	0.992214	1.00058	0.997736	1.00032	1.00132	1.00381	0.99992	1.00318	0.999828	1.00382	1.00135
24.5		0.998384	1.01473	1.00815	1.00733	0.997843		0.997284	1.00494	1.00021	NaN	NaN	NaN	NaN	0.999942	0.999962	0.998974	0.997444	1.00108	1.00118	1.00235	1.00124	1.00216	0.999668	1.00005	1.00048
25.5		1.00134	0.993769	1.01361	1.0027	1.00209		0.998803	1.0026	0.99831	NaN	NaN	NaN	NaN	1.00036	0.999216	1.00364	1.00071	1.00172	1.00144	0.995759	0.999989	0.995115	0.999144	0.998797	1.00112
26.5		0.999308	1.00484	1.02326	0.994441	0.996476		1.00276	1.00375	0.998136	NaN	NaN	NaN	NaN	0.999515	0.999798	1.00089	1.00035	1.00012	1.00046	1.00307	0.9996	1.00154	0.998687	1.0016	0.998761
27.5		0.998191	0.99841	1.00053	1.00004	1.00138		1.00158	1.00279	1.0006	NaN	NaN	NaN	NaN	0.99968	0.996806	0.999367	0.998332	0.998741	1.00047	0.999569	0.99869	0.993345	1.0014	1.00161	0.999879
28.5		0.995867	NaN	1.00375	1.00161	0.992406		1.00022	1.00245	1.00003	NaN	NaN	NaN	NaN	NaN	NaN	1.00008	1.00064	NaN	NaN	1.00184	1.00117	0.995673	1.0002	0.999352	0.998851
29.5		1.00206	NaN	1.01511	1.00568	1.00022		0.999184	1.00064	0.998679	NaN	NaN	NaN	NaN	NaN	NaN	NaN	NaN	NaN	NaN	1.00316	1.00167	0.994885	1.00002	1.00012	0.998924
30.5		1.00233	NaN	0.982796	1.00463	1.00058		1.00167	1.00219	0.997817	NaN	NaN	NaN	NaN	NaN	NaN	NaN	NaN	NaN	NaN	1.00938	1.00077	0.995155	0.999564	1.00191	0.998787
31.5		0.999271	NaN	1.02078	0.993215	0.99769		1.00121	1.00273	0.997399	NaN	NaN	NaN	NaN	NaN	NaN	NaN	NaN	NaN	NaN	1.00148	1.00001	0.999584	1.0009	1.00167	0.999424
32.5		1.00118	NaN	1.01058	0.997981	1.00065		0.996557	1.00347	0.998491	NaN	NaN	NaN	NaN	NaN	NaN	NaN	NaN	NaN	NaN	0.993861	0.999238	0.992791	0.999681	1.00245	1.00096
33.5		1.00719	NaN	0.997313	1.0046	0.992673		0.999752	1.00482	0.999671	NaN	NaN	NaN	NaN	NaN	NaN	NaN	NaN	NaN	NaN	NaN	NaN	NaN	NaN	1.0017	1.00118
34.5		0.999825	NaN	1.00466	1.00238	1.0028		NaN	NaN	1.00097	NaN	NaN	NaN	NaN	NaN	NaN	NaN	NaN	NaN	NaN	NaN	NaN	NaN	NaN	1.0002	1.00076
35.5		0.999916	NaN	1.0014	1.00026	1.00075		NaN	NaN	1.00009	NaN	NaN	NaN	NaN	NaN	NaN	NaN	NaN	NaN	NaN	NaN	NaN	NaN	NaN	0.998953	1.00161
36.5		1.00256	NaN	1.00299	0.995399	1.00206		NaN	NaN	0.998714	NaN	NaN	NaN	NaN	NaN	NaN	NaN	NaN	NaN	NaN	NaN	NaN	NaN	NaN	1.00023	0.999876
37.5		NaN	NaN	0.998581	1.00508	1.00114		NaN	NaN	0.999821	NaN	NaN	NaN	NaN	NaN	NaN	NaN	NaN	NaN	NaN	NaN	NaN	NaN	NaN	1.00176	0.999261
38.5		NaN	NaN	0.99953	0.99314	1.00286		NaN	NaN	0.997053	NaN	NaN	NaN	NaN	NaN	NaN	NaN	NaN	NaN	NaN	NaN	NaN	NaN	NaN	1.00102	0.995877

## Sheet: Figure5-1_G
Tims (s)		Individual Surface Arteries									Individual Penetrating Arteries
-100.5		4.03466	-0.0508935	-3.87492	-5.63241	-0.0566251	-7.09459	-6.42974	-6.99884		1.29837	0.86815	0.897843	-0.00584888	-5.64557	-0.400396	-7.27084	-3.02585
-99.5		3.65077	2.8048	-0.605354	2.7668	1.92525	-7.65766	-7.04941	-4.73052		-1.50035	0.388119	3.93554	-0.30468	-1.33171	0.996765	-7.79548	-5.02793
-98.5		3.65077	-2.90658	4.62594	12.6482	4.75651	-7.65766	-7.04941	4.34277		-0.495489	2.78183	1.52853	0.133604	-0.370228	4.12007	-8.48494	-6.65686
-97.5		4.41856	-1.76431	11.1651	1.77866	4.19026	-4.27928	-5.81007	-7.75494		2.14777	3.09503	-0.706477	1.35128	5.2708	2.40233	-9.6445	-3.68049
-96.5		-2.1076	-2.90658	2.01029	4.74308	4.75651	-12.7252	-9.5281	-6.24273		-3.55196	-1.08507	-7.49767	0.018308	-2.09659	0.787716	-5.82687	-2.35667
-95.5		-3.25928	-8.61796	-1.91318	3.75494	4.75651	-8.78378	-13.2461	-12.2916		-1.00809	-2.95781	-3.0388	-2.61927	-4.43534	0.428528	-9.45961	-0.567676
-94.5		-4.02706	0.520244	2.01029	3.75494	-0.906002	-9.90991	-8.90843	-1.70609		4.35065	1.26866	1.37243	1.77732	-3.01809	0.573731	-2.36723	-4.64648
-93.5		-1.33982	2.8048	-2.40361	-7.6087	-6.28539	-8.22072	-5.50024	-4.73052		3.37611	0.539511	0.110909	-0.686707	-3.93408	0.439363	-3.23073	-1.7952
-92.5		-0.188145	1.66252	4.62594	-7.11462	-4.30351	0.225225	-5.1904	5.85498		1.33236	-1.907	2.53934	1.56435	-0.823325	3.34799	3.19141	0.474661
-91.5		-0.188145	-2.90658	2.01029	-4.1502	-0.906002	-11.036	-1.47238	2.83055		-1.06942	-0.125895	1.68661	-2.41652	-0.472353	1.95669	-1.28188	-3.66618
-90.5		-0.188145	8.51617	-1.91318	9.68379	4.19026	-5.40541	-5.1904	-9.26716		-1.26215	2.82801	-3.02945	-0.044288	-0.558577	1.54615	-1.59674	-4.01657
-89.5		-0.572037	-8.61796	-3.221	5.23715	1.92525	-7.65766	-12.6264	-10.7794		1.77456	-0.256342	-3.96129	1.33236	1.58769	2.41834	-9.65687	-5.45245
-88.5		-7.86598	-8.61796	-8.4523	0.790514	1.92525	-9.90991	-8.28876	2.83055		-4.88986	-4.18724	-6.64829	-2.58379	-4.171	-0.406486	0.250249	2.689
-87.5		-7.86598	-2.90658	-8.4523	8.69565	1.92525	-12.1622	-4.57073	5.85498		-3.91763	-0.207485	-10.1649	-1.61803	-0.317605	0.340617	1.18804	-0.632649
-86.5		-0.572037	1.09138	3.97203	4.74308	1.92525	-5.96847	-5.1904	2.07445		3.03905	1.16164	-0.506078	0.706847	2.89731	5.13791	-4.40741	-1.4957
-85.5		-0.188145	-2.90658	-0.605354	7.70751	2.49151	-8.78378	-5.81007	-9.26716		-1.97991	-0.143775	6.52685	1.39629	-0.26415	-0.134232	-9.32115	-7.40713
-84.5		-0.188145	2.8048	-5.83665	8.69565	1.359	-15.5405	-7.04941	-9.26716		4.37221	2.11705	0.672947	1.25655	-2.71667	-1.01462	-5.21955	-5.96237
-83.5		0.579639	2.8048	5.93377	6.71937	1.359	-8.78378	-5.81007	5.85498		1.24885	-0.216327	1.61286	0.703563	-0.86092	1.49359	-6.24218	-4.45644
-82.5		1.73131	0.37746	11.6555	-7.11462	1.64213	-4.27928	-6.42974	-2.46219		1.90607	-1.01054	-0.18015	-0.669871	0.397849	1.02799	-6.77009	-6.45111
-81.5		3.65077	3.94707	-1.91318	-5.13834	-3.73726	-7.65766	-7.66909	-1.70609		0.0156909	-1.04852	-1.20673	3.39895	4.25408	-0.177399	-5.81025	-3.26844
-80.5		0.579639	2.8048	-5.83665	0.790514	-2.03851	-8.78378	-7.04941	-3.2183		0.788851	4.16202	-1.17793	1.51575	1.22124	-0.372814	-2.59922	-2.2657
-79.5		-3.25928	-5.76227	-3.221	-1.18577	1.07588	-5.96847	-9.5281	-7.75494		-4.16471	-2.28434	-4.37978	-4.01743	-2.46128	-0.617305	-9.24598	-4.86511
-78.5		-0.188145	-8.61796	-0.605354	-0.197628	1.359	-7.65766	-12.0068	-12.2916		0.091625	0.745621	-4.59737	0.984673	-3.34869	0.0799584	-9.06844	-4.99458
-77.5		-4.02706	-4.04886	-1.91318	1.77866	-0.906002	-9.90991	-8.90843	-1.70609		0.557602	2.82405	1.91886	-1.64572	-2.69536	-1.63711	-12.8328	-4.11543
-76.5		-5.17874	-2.90658	-2.56709	5.23715	-0.0566251	-6.53153	-13.8658	-15.316		1.1136	-0.849367	-2.60944	-0.351527	-0.0586386	-0.335812	-13.1087	-5.34094
-75.5		-0.188145	2.8048	4.62594	-0.197628	1.359	-7.65766	-15.1051	-10.7794		-2.11424	-3.66826	-4.25066	1.02718	0.169134	-2.33273	-10.9639	-4.02794
-74.5		-4.02706	-2.90658	2.01029	-6.12648	-3.17101	-9.90991	-11.3871	-7.75494		1.72278	1.47478	-7.20886	-0.872515	-2.99029	3.14317	-14.3681	-2.6156
-73.5		-4.02706	-9.76024	-7.14448	-13.0435	1.92525	-8.78378	-11.3871	-7.75494		-6.64182	-1.83383	-7.51187	-1.66226	0.1857	-2.17617	-7.07028	-7.32173
-72.5		-5.17874	-0.622031	-5.18274	-4.1502	2.20838	-7.65766	-5.1904	-1.70609		-2.66964	0.615389	-0.710872	-2.86471	-1.14017	-2.40428	-3.453	0.453604
-71.5		-0.955928	-8.61796	-1.91318	-8.10277	-0.906002	-9.90991	-0.852709	-0.193874		2.88242	-2.19742	-1.88668	3.21347	-2.93644	-2.15061	-5.51717	4.02851
-70.5		3.65077	5.08935	-8.4523	-4.1502	-0.906002	-7.65766	-0.852709	-1.70609		-0.795724	-1.9358	1.81548	-3.2938	0.194943	-2.97522	-4.36129	0.0586794
-69.5		1.34742	-0.0508935	4.62594	-2.66798	3.05776	-11.036	-0.542874	1.31834		-2.14357	0.145904	1.55523	0.967504	-3.08668	1.32599	-1.23156	0.040893
-68.5		-0.955928	-0.622031	-1.91318	-1.18577	3.05776	-9.90991	-0.852709	-0.193874		-2.90866	-3.35779	0.570187	-1.88669	0.906229	4.26468	-0.201011	-3.74866
-67.5		3.65077	7.3739	0.70247	2.7668	4.19026	1.35135	-3.33139	-4.73052		-2.68508	2.26227	-3.34753	-3.60694	4.22023	3.40331	-7.18246	-0.99913
-66.5		2.88299	8.51617	5.93377	2.7668	4.75651	-11.036	-7.04941	-9.26716		-0.587375	1.98367	-0.432428	1.94084	3.32957	3.47656	-2.36918	-2.84242
-65.5		2.4991	0.520244	7.8955	-1.67984	2.20838	-5.96847	-6.11991	2.07445		2.22008	1.78183	3.01122	0.818316	0.660396	-0.803889	0.119388	2.29595
-64.5		7.48969	7.3739	3.31812	6.71937	-0.906002	-9.90991	-1.47238	5.85498		1.05604	0.673159	5.79437	-0.714032	-2.4645	-1.81315	-0.667653	3.57305
-63.5		7.48969	10.8007	5.93377	1.77866	1.92525	-5.40541	-2.71172	-1.70609		1.32107	0.291603	7.52152	7.683	3.21727	0.508834	1.05601	0.6764
-62.5		4.03466	11.3719	2.66421	6.71937	5.03964	-5.96847	-0.852709	4.34277		2.01019	1.70515	7.81191	-2.93041	1.35043	0.227555	2.23875	-5.84337
-61.5		6.72191	2.8048	7.24159	1.77866	2.49151	-3.15315	0.386632	5.85498		3.22404	-1.12608	3.47748	-3.69715	0.639715	2.21826	-0.634973	4.82828
-60.5		7.48969	3.94707	-1.91318	4.74308	-0.906002	0.225225	-0.852709	5.85498		0.179454	-0.309752	10.7817	-0.115793	-0.192227	0.982781	-5.24083	-1.59917
-59.5		7.48969	2.8048	8.54942	3.75494	4.75651	-8.78378	-4.57073	1.31834		0.729249	4.5554	5.74254	4.12954	-0.208173	3.31333	-4.60927	0.795087
-58.5		7.48969	8.51617	8.54942	1.77866	4.19026	-6.53153	-1.16254	3.58666		1.87464	1.44342	7.4539	-0.904465	-0.67466	2.0043	-0.418155	-1.06343
-57.5		6.72191	13.0853	9.85724	-3.16206	1.92525	-8.78378	-0.852709	4.34277		3.16879	1.39511	0.175714	-1.25284	2.32982	2.85782	-0.568268	3.33443
-56.5		-0.188145	2.8048	0.70247	-8.10277	-0.906002	-3.15315	-0.233039	5.85498		2.90806	3.20187	-0.378393	-2.06655	0.2378	-1.0445	-1.28461	2.98948
-55.5		-0.188145	7.94504	2.01029	-4.1502	-2.03851	-6.53153	-0.233039	2.83055		2.08394	-0.312054	-0.300799	1.1263	1.92434	-1.22809	-1.61633	-1.2048
-54.5		2.11521	2.8048	3.31812	1.77866	0.792752	-5.40541	0.386632	5.85498		-3.6014	-2.74368	-10.9559	0.236228	5.89687	1.41805	-4.23884	4.26153
-53.5		-0.188145	-0.622031	13.7807	2.7668	1.359	-9.90991	1.0063	5.85498		0.255043	5.30378	-1.68314	1.60093	1.49657	0.231313	-1.38469	-0.651713
-52.5		-3.25928	2.8048	7.24159	-5.13834	1.92525	-3.15315	-0.852709	-1.70609		-0.150225	4.27562	-2.15952	3.29601	4.78331	2.78342	-2.96995	-1.2228
-51.5		1.73131	-6.90455	6.58768	0.790514	4.75651	-5.96847	-0.542874	2.07445		-2.85004	3.37636	-4.16088	0.0249054	2.7698	2.87519	-6.42851	-1.77776
-50.5		-3.25928	-7.47568	-12.3758	1.77866	7.58777	-6.53153	-0.852709	1.31834		-2.4614	2.27119	-0.655372	-3.28718	-1.95484	2.50192	-1.89261	3.83539
-49.5		-3.25928	-5.19113	0.70247	6.71937	4.19026	-5.40541	2.24564	-1.70609		1.37328	4.36102	-0.150897	-0.831747	2.95759	4.42441	0.472721	-0.598467
-48.5		-0.66801	-2.33544	-1.91318	1.77866	4.47339	-3.71622	1.31614	5.09888		-1.01515	1.48658	-4.25727	-0.00202441	1.83921	2.33931	-0.112015	-3.82888
-47.5		-0.188145	2.8048	8.54942	-5.13834	4.75651	-4.27928	4.72433	5.85498		1.13678	4.25331	2.39376	-1.75386	3.5614	-2.10263	-2.09656	-2.9767
-46.5		2.11521	5.08935	2.01029	-3.16206	4.75651	-4.27928	7.20301	1.31834		-1.31983	-2.80748	1.85498	-0.707822	-1.24315	-1.10521	8.54649	-3.74191
-45.5		6.72191	-2.90658	4.62594	8.69565	6.45527	-8.78378	6.58334	4.34277		2.97173	5.08846	0.614613	2.8625	-2.77726	0.309372	5.56099	1.76488
-44.5		4.41856	2.23366	3.31812	4.74308	8.72027	-8.78378	5.344	4.34277		0.115198	-1.49109	3.73365	-0.260252	3.68075	3.60228	0.0447455	0.21073
-43.5		7.48969	15.3698	9.53028	-1.18577	8.15402	0.225225	5.344	5.85498		1.9665	5.31314	6.74646	0.0457914	2.07003	2.43808	0.142872	3.62721
-42.5		7.48969	8.51617	17.7042	5.73123	7.58777	-0.900901	9.06202	7.3672		1.12067	0.881605	5.50713	-0.0884304	1.63977	4.20059	5.37295	4.26313
-41.5		7.1058	6.80276	3.31812	4.24901	6.17214	-6.53153	7.20301	11.1477		1.86533	2.20001	5.06329	3.2187	4.04529	1.80789	6.90644	2.37549
-40.5		2.88299	7.3739	5.93377	-3.16206	4.19026	-7.65766	5.96367	5.85498		-0.846691	1.35021	-0.669634	5.37771	2.26012	1.39948	5.26986	-2.29031
-39.5		-3.25928	2.8048	-7.14448	-2.17391	3.05776	-7.65766	0.386632	-1.70609		-2.51174	4.68056	3.43992	1.16744	0.928372	0.0326296	4.3285	-2.25982
-38.5		-5.17874	-1.19317	0.0485578	1.77866	2.20838	-3.71622	-1.16254	-5.48662		1.67338	0.137992	-2.01827	2.56024	0.525705	2.70854	-6.24453	-0.41715
-37.5		-7.86598	-4.04886	-1.91318	8.69565	4.19026	-0.900901	3.48498	1.31834		2.78396	-4.68636	0.0503174	-1.94561	-1.20113	3.84952	2.00423	-0.634724
-36.5		-9.40155	-2.90658	4.62594	-1.18577	4.75651	-5.40541	1.62597	5.85498		1.63078	-4.30577	-5.01737	0.180908	2.55163	3.36455	-4.36292	-0.91489
-35.5		-4.02706	2.8048	4.62594	7.70751	6.45527	-2.02703	-0.852709	5.85498		-0.115057	-2.86777	-2.37674	-5.37164	2.4982	0.724338	-7.36513	-3.06852
-34.5		-4.41095	-2.90658	0.0485578	-1.67984	3.90713	-4.84234	0.696467	-0.949981		-0.682348	-1.06702	-5.9929	-1.1547	2.80342	4.64046	0.87361	-2.9995
-33.5		-4.02706	2.8048	-0.605354	-1.18577	4.19026	-5.40541	-0.852709	-1.70609		-3.03148	-0.192019	-2.95182	2.38948	1.96055	1.67712	-4.11033	2.34052
-32.5		-4.02706	-2.90658	0.70247	-7.11462	4.19026	-6.53153	1.62597	5.85498		-0.587425	-2.68166	2.43246	-0.117833	-0.484262	3.15446	0.972669	2.27581
-31.5		0.96353	3.37593	-0.605354	-8.10277	-2.32163	-4.84234	4.41449	2.83055		-0.491991	-3.21831	-0.887069	0.761272	-2.42421	-1.43958	-0.860329	-1.34328
-30.5		-3.25928	-2.90658	-7.14448	-8.10277	-3.73726	-4.27928	-0.852709	4.34277		0.594764	2.63895	-1.8524	-2.32928	-0.189993	1.25763	-4.5152	-2.30128
-29.5		-3.25928	-6.33341	-1.91318	-4.1502	-2.60476	0.225225	2.24564	5.85498		-1.86447	5.41948	-1.68675	-0.665271	2.548	-0.09081	-2.20569	0.200428
-28.5		-3.25928	-6.33341	-1.91318	-3.16206	1.21744	-8.78378	4.10466	5.85498		2.94591	-2.82462	-3.41834	1.32204	-4.45025	-0.823934	2.23159	-1.3069
-27.5		-4.02706	-1.19317	-7.79839	6.2253	1.64213	-7.65766	4.41449	5.85498		0.404453	-0.99891	0.155267	-1.07294	1.22807	1.61121	-2.39417	0.638145
-26.5		-3.25928	-5.19113	-13.6836	-7.11462	-3.73726	-8.78378	-2.09205	-1.70609		-0.0503776	-3.37415	2.06896	-2.22583	-1.12847	-2.58043	-1.98582	-3.80376
-25.5		0.579639	2.8048	2.01029	-1.18577	-3.73726	-0.900901	-5.81007	-3.2183		-2.66013	-0.253817	2.48233	0.326956	-5.65365	-0.308772	-7.35476	-2.38635
-24.5		2.11521	-3.47772	-7.14448	-3.65613	-3.45413	-3.15315	-1.78221	5.09888		1.05717	-4.17746	-1.66628	0.272346	-0.169351	-0.144871	-2.76829	2.4661
-23.5		2.88299	8.51617	11.1651	2.7668	0.792752	1.35135	0.386632	5.85498		0.580778	-1.10678	-0.0306681	4.60399	1.11942	-0.449026	3.80545	-0.505334
-22.5		3.65077	6.23162	-1.91318	-2.17391	1.92525	-9.90991	3.48498	5.85498		2.82903	3.22043	1.6754	3.43053	-1.24826	1.9061	2.70746	2.46894
-21.5		3.65077	1.66252	-1.91318	2.7668	1.92525	3.6036	3.48498	11.9038		-0.959723	-0.696503	-2.63264	-3.00843	-0.557653	-0.906078	6.17537	0.847761
-20.5		-4.41095	-8.04682	-4.52883	0.296443	4.75651	-5.40541	5.344	7.3672		0.362904	-0.185123	-6.16489	0.148073	1.36228	1.01958	-3.37003	2.89931
-19.5		-4.02706	-10.9025	-1.91318	0.790514	0.226501	1.35135	4.72433	5.85498		-1.21446	-6.61541	1.38254	0.432592	-0.89586	-0.949279	2.04106	-1.55893
-18.5		-7.0982	0.520244	-7.14448	-1.18577	-3.73726	1.35135	4.10466	5.85498		-2.48141	-1.6546	-2.00885	-1.99637	-2.78739	-1.80062	-3.62898	0.677653
-17.5		0.96353	-0.0508935	-4.52883	-13.5375	-9.6829	-3.15315	5.03416	7.3672		-2.25835	1.56721	0.829015	2.56313	-3.78699	-2.04917	-0.369927	4.63455
-16.5		-4.02706	2.8048	4.62594	-11.0672	-9.39977	-11.036	5.344	5.85498		0.489228	-1.0462	0.570612	0.183647	0.0325374	1.40647	6.48794	2.40097
-15.5		-3.25928	-4.04886	2.01029	-2.17391	-6.56852	-9.90991	4.72433	5.85498		0.553812	-1.38484	-2.10906	-0.468126	-0.617715	2.57533	2.45716	0.603729
-14.5		-1.72371	-0.622031	-1.91318	-22.9249	-6.56852	-3.15315	5.344	7.3672		-4.89544	-0.294175	2.96124	-1.70459	-8.00543	-2.55281	2.26057	-1.97631
-13.5		-1.72371	-8.04682	1.35638	-20.4545	-11.3817	-4.27928	0.696467	5.85498		2.97705	-2.99242	-0.206944	1.06589	-3.41069	-2.80596	-3.79708	1.18206
-12.5		-4.02706	-7.47568	-3.221	-16.0079	-15.0623	-0.900901	2.86531	7.3672		-4.92188	0.706452	-2.20045	0.176988	-2.7656	-4.72476	-1.0235	1.39852
-11.5		-10.1693	-8.61796	-14.9914	-15.0198	-11.0985	-2.02703	0.386632	5.85498		2.36875	0.374861	2.00454	0.21965	-3.04618	-3.0508	-2.0359	3.2529
-10.5		-9.40155	-11.4736	-11.0679	-4.1502	-6.56852	-5.96847	-0.542874	1.31834		-1.12539	-6.1699	-5.04033	-2.53934	-1.69315	-1.37834	-3.67467	3.53352
-9.5		-2.4915	-2.90658	-14.9914	-9.09091	-4.30351	-5.40541	0.386632	7.3672		-3.51862	0.174311	-0.76872	-1.9869	-3.02999	-2.40854	0.420998	6.44065
-8.5		1.34742	2.8048	0.70247	-6.12648	-9.39977	-6.53153	0.386632	8.87941		-0.40668	3.93222	2.70229	-6.51787	-3.53296	-2.2128	-1.49953	1.15335
-7.5		-0.188145	-1.76431	4.62594	-9.09091	-6.56852	-3.15315	5.344	5.85498		2.85621	0.0764766	-0.447473	5.34113	-5.57667	-1.51676	3.28456	1.23747
-6.5		2.11521	-7.47568	4.62594	-1.67984	-2.88788	-4.84234	4.41449	7.3672		-1.30664	-2.70229	-0.314705	-0.525487	-0.0784187	-0.125535	0.968771	4.83843
-5.5		-0.188145	-15.4716	-8.4523	-10.0791	-3.73726	-13.2883	5.344	5.85498		5.78329	-4.26505	-6.15552	-2.75458	-2.33277	0.0524301	3.16764	5.85554
-4.5		-4.79485	-4.04886	-7.14448	-5.13834	-3.73726	-11.036	4.72433	7.3672		-1.12633	-0.193861	-3.80724	-2.07415	-4.15303	-1.97426	6.03714	2.65313
-3.5		-0.572037	-1.19317	-5.18274	-0.197628	-5.43601	-5.96847	2.3231	4.34277		-1.45676	-1.53289	-1.22568	-0.51547	-3.49777	-1.83628	0.408332	5.14779
-2.5		3.65077	3.94707	-13.6836	-5.13834	-6.56852	-8.78378	4.72433	5.85498		0.0232674	1.39693	5.22921	4.50248	-4.93363	1.4679	3.65944	3.06763
-1.5		6.72191	-2.90658	11.1651	-16.996	-6.56852	-7.65766	5.344	5.85498		-1.21495	1.34057	-0.617983	1.79962	1.38408	-1.32374	0.278571	3.24998
-0.5		10.5608	8.51617	-1.91318	-13.0435	-8.26727	-5.40541	5.344	5.85498		2.85439	6.28553	4.042	-0.68359	-4.09296	-1.82184	4.29842	3.83587
0.5		10.1769	5.08935	1.35638	-14.0316	-11.6648	-11.5991	5.96367	6.61109		1.58625	0.794824	4.81889	1.92279	-3.25268	-4.46373	5.61139	6.52204
1.5		6.72191	2.8048	9.85724	-17.9842	-3.73726	-6.53153	5.344	5.85498		1.88378	-3.35348	1.65444	-1.21008	0.805357	-1.05171	15.1603	3.17057
2.5		6.72191	6.23162	4.62594	3.75494	-6.56852	-7.65766	7.82268	10.3916		0.657488	-1.54585	-0.249886	2.14367	-2.27881	-1.20672	2.73228	2.9856
3.5		7.1058	-2.33544	0.0485578	-8.59684	-5.15289	-11.5991	7.82268	8.1233		2.14645	2.68848	3.14464	-0.727229	-1.84709	-0.123793	11.2136	6.19254
4.5		8.25747	9.65845	4.62594	-4.1502	-3.73726	-9.90991	7.82268	11.9038		-0.0173871	-1.97927	4.11036	8.00736	-4.76696	0.606963	5.91787	7.88769
5.5		0.579639	8.51617	-3.221	-4.1502	-7.13477	-8.78378	8.44235	8.87941		4.67824	1.43924	2.27339	3.57252	-1.60846	-6.72352	7.27463	6.06011
6.5		3.26688	-1.76431	5.93377	-13.5375	-11.0985	-9.90991	8.13251	16.4405		-0.679425	-0.111624	1.75424	-1.61624	-2.49783	-1.46597	11.9666	4.41684
7.5		3.65077	2.8048	11.1651	-7.11462	-3.17101	-5.40541	9.06202	19.0869		-4.73516	-0.668138	4.95374	2.60669	-3.05956	-1.1475	5.69603	7.63506
8.5		6.72191	2.8048	4.62594	-1.18577	-3.73726	-3.15315	12.1604	10.3916		4.55252	-5.49835	8.07837	5.23784	2.24907	-0.448224	10.3916	9.12744
9.5		6.72191	0.520244	17.7042	5.73123	-0.906002	-8.78378	12.1604	14.9283		-1.59358	1.16838	5.95975	4.9866	1.12094	0.0627101	7.78723	1.68263
10.5		7.1058	0.520244	5.93377	-2.17391	-1.47225	-9.34685	9.99153	9.63552		-1.80843	1.68488	1.55798	-0.427139	-1.20255	2.44109	12.1206	6.19844
11.5		7.48969	0.520244	-1.91318	-5.13834	-3.17101	-8.78378	5.96367	5.85498		-2.82377	-3.4483	9.53905	-1.03963	1.1751	2.68763	-1.81625	6.18462
12.5		3.65077	11.943	7.24159	0.790514	1.92525	-9.90991	-3.95106	-7.75494		-0.375703	5.78393	-3.22872	-1.36483	0.0912137	-3.74005	1.35733	0.391938
13.5		3.26688	1.09138	-1.25927	4.74308	2.49151	-7.09459	-0.542874	4.34277		-1.50657	-2.85604	-2.25828	0.124315	1.44351	0.850571	6.99258	1.26782
14.5		5.95412	2.8048	-1.91318	-2.17391	0.792752	-4.27928	2.24564	5.85498		-5.49042	-1.79636	4.52684	-2.10038	-0.666801	3.60415	8.06702	6.84501
15.5		5.95412	-2.90658	11.1651	5.73123	1.92525	-8.78378	2.24564	5.85498		2.85407	-0.551298	5.31418	6.4142	-0.166446	1.57859	4.39814	3.18184
16.5		11.3286	8.51617	16.3964	-3.16206	1.359	-3.15315	2.24564	7.3672		4.57806	-0.141715	0.86563	2.5203	-4.28525	0.212374	6.6351	7.02032
17.5		9.40915	6.23162	7.8955	7.70751	0.792752	-7.65766	5.344	8.87941		0.159655	2.21977	6.01598	-0.0111033	1.41211	2.51457	4.97849	3.30044
18.5		8.25747	8.51617	5.93377	5.73123	5.32276	-14.4144	6.58334	7.3672		3.65467	7.57245	5.35185	1.84065	0.935689	3.86091	2.31928	5.66497
19.5		11.3286	2.8048	12.4729	7.70751	5.88901	-0.900901	1.62597	1.31834		2.76113	0.878686	3.10693	3.33873	-0.0721307	2.03486	5.20912	5.07783
20.5		5.57023	2.23366	0.70247	6.71937	2.20838	-7.65766	2.24564	4.34277		1.15148	3.73935	0.758804	1.60417	6.69462	3.52364	3.29215	3.15829
21.5		6.72191	-1.76431	-0.605354	5.73123	6.45527	-5.40541	2.24564	5.85498		1.3039	-2.29687	-1.14202	-3.73167	1.06238	0.192547	2.6904	8.98888
22.5		1.34742	5.08935	-1.91318	11.6601	5.32276	-3.15315	2.24564	5.85498		5.25631	3.53682	-0.846503	-0.184702	2.32721	3.04465	1.71456	1.21418
23.5		3.65077	-8.61796	-8.4523	6.71937	4.75651	-2.02703	2.86531	5.85498		3.13187	-3.63704	2.13604	3.05912	3.44352	3.69936	2.76492	-2.95905
24.5		2.11521	-13.1871	-1.91318	3.26087	6.17214	-9.90991	2.24564	2.07445		0.337187	0.0829969	-4.82126	-2.11678	5.75121	3.75359	1.84118	2.35673
25.5		3.65077	-8.61796	-1.91318	5.73123	7.58777	-12.1622	1.62597	-1.70609		-2.24061	-1.96841	0.783443	2.39543	0.0670816	3.25229	-0.523238	2.94723
26.5		3.65077	-2.90658	2.01029	10.6719	3.62401	-15.5405	-2.71172	-4.73052		2.18972	0.958285	5.5387	0.421689	4.17204	3.9842	-4.64811	-1.82822
27.5		3.65077	-1.76431	-5.18274	4.74308	5.60589	-7.65766	-3.02156	-12.2916		-0.773196	1.27811	2.65413	-2.88668	2.23776	3.04613	-5.70155	-0.167066
28.5		5.95412	-2.90658	-14.9914	4.74308	7.58777	-9.90991	-10.7674	-16.8282		7.1312	1.25891	1.24663	4.46907	4.90277	2.40651	-5.26592	-0.608325
29.5		11.3286	8.51617	11.1651	6.71937	5.88901	-3.15315	-7.66909	1.31834		0.169201	-0.398814	3.14841	-1.08086	2.87425	5.10881	-5.87221	1.79937
30.5		11.3286	8.51617	7.24159	2.7668	7.58777	-9.90991	-8.28876	-4.73052		4.02583	0.980189	3.65415	8.08396	3.88274	5.59694	-3.03236	-4.04963
31.5		12.0964	6.80276	10.5112	13.6364	5.32276	0.225225	-12.0068	-16.8282		0.113232	2.14925	6.60053	-0.79689	4.90277	4.67272	-6.91966	-3.22787
32.5		7.48969	2.8048	4.62594	12.6482	7.58777	-4.27928	-15.7248	-24.3893		0.735804	0.477319	2.08533	-1.03684	1.67446	7.04125	-3.79746	-3.37883
33.5		5.95412	3.94707	-1.91318	17.5889	8.15402	-3.15315	-12.0068	-6.24273		-0.708792	1.15688	3.77027	2.62719	3.1886	5.31155	-3.7981	-5.21976
34.5		3.26688	8.51617	1.35638	4.24901	7.02152	-2.02703	-13.4785	-9.26716		-0.951923	1.1454	-1.60659	-0.478128	5.38501	3.59088	-9.18552	-7.3157
35.5		3.65077	3.94707	-9.76012	3.75494	4.75651	-2.02703	-15.1051	-9.26716		-0.0440736	-0.964499	1.90792	6.60461	3.61135	6.97079	-3.38657	-4.42002
36.5		-0.188145	13.0853	-1.91318	7.70751	9.85277	1.35135	-13.2461	-7.75494		1.48194	5.74175	-1.19247	1.98692	3.87555	1.85047	-5.62419	-2.11537
37.5		2.11521	2.8048	3.31812	15.6126	10.419	-0.900901	-7.04941	4.34277		0.397163	5.86839	4.76462	1.751	3.89806	3.55993	1.01564	-6.65211
38.5		3.65077	0.663029	0.0485578	13.1423	7.58777	-3.71622	-11.6969	-10.0233		1.25014	1.24756	1.41313	-0.468958	-1.74658	3.25949	-8.51498	-4.22175
39.5		1.34742	7.3739	3.31812	-3.16206	5.32276	-6.53153	-8.90843	-13.8038		-2.02063	-1.84456	-0.112932	4.70873	2.54619	3.90353	-8.45158	-3.6466
40.5		2.88299	14.2276	-13.6836	-2.17391	7.02152	0.225225	-7.66909	-7.75494		-1.69775	-2.89879	-3.88599	-0.39989	-1.53124	6.68149	-1.74301	-2.08416
41.5		-2.87539	-5.19113	-8.4523	7.70751	3.05776	-3.71622	-5.50024	-5.48662		0.887978	-0.108366	-1.07057	-2.12799	0.650846	1.36579	-6.25335	-4.19701
42.5		-4.02706	8.51617	-0.605354	4.74308	4.75651	-14.4144	-12.0068	-9.26716		1.96548	2.07477	-3.50788	-1.26167	-2.5754	3.54734	-6.44365	-3.19113
43.5		-2.4915	2.8048	-0.605354	3.75494	3.62401	-2.02703	-8.28876	-9.26716		-0.732358	2.19207	-1.17194	0.743712	3.47273	7.87029	-5.16059	-2.49404
44.5		2.88299	2.8048	5.27985	12.1542	3.34088	-5.40541	-5.81007	-0.193874		-1.74989	1.11768	0.563229	1.84171	-0.237274	1.14563	-0.547575	0.215038
45.5		7.48969	2.8048	-0.605354	1.77866	4.75651	-6.53153	-2.71172	5.85498		-3.04705	3.06874	0.258478	-5.91509	1.36978	5.25649	-3.33394	2.29047
46.5		3.65077	2.8048	-3.221	6.71937	7.58777	-2.02703	-5.1904	1.31834		0.123924	-1.98761	5.86576	1.03157	0.718054	8.1658	-4.11103	-6.67801
47.5		3.65077	11.943	4.62594	3.75494	4.75651	-3.15315	-4.57073	5.85498		-1.28245	-1.2274	-2.5501	1.90765	3.01037	4.11132	-4.22182	4.25407
48.5		7.1058	2.8048	-1.91318	12.1542	4.19026	-6.53153	-1.78221	3.58666		-0.232747	1.02487	0.439019	-0.458503	-0.181982	3.92866	0.930273	3.67737
49.5		6.72191	9.65845	-11.0679	4.74308	3.05776	5.85586	-2.09205	5.85498		-4.48635	-0.412835	4.67975	2.79336	-1.60641	3.61401	1.70381	2.0815
50.5		3.65077	2.8048	2.01029	9.68379	4.75651	-4.27928	-3.95106	-6.24273		-3.92921	4.36241	-1.766	0.783773	4.19114	4.62513	-3.87538	0.913852
51.5		3.65077	-6.90455	1.35638	1.28458	5.03964	-7.65766	-2.71172	1.31834		2.65953	1.89582	-0.0158973	0.856938	0.244297	6.94684	2.07131	1.68275
52.5		2.88299	1.66252	-3.221	8.69565	3.05776	-5.40541	-2.71172	5.85498		-1.16358	-0.0519471	-2.70701	-0.662604	2.31431	5.69417	0.178738	2.71105
53.5		4.41856	2.8048	-1.91318	11.6601	1.92525	-7.65766	-0.852709	5.85498		-3.77035	-0.547697	0.910832	-1.09555	1.04321	2.47098	-2.73915	1.29293
54.5		7.48969	-4.04886	4.62594	15.6126	5.32276	-4.27928	-0.233039	5.85498		1.53113	0.498689	6.89713	1.56695	0.305422	6.49064	0.963969	-1.20324
55.5		1.73131	0.520244	3.31812	4.24901	2.49151	-13.8514	2.24564	5.85498		-1.07085	-1.53498	-1.31052	-1.43132	3.91716	4.00661	5.52421	3.03092
56.5		3.65077	2.8048	-1.91318	11.6601	3.62401	-2.02703	2.24564	5.85498		1.05852	-1.61886	-5.70586	1.186	-2.33742	2.131	2.33807	-1.60884
57.5		3.65077	2.8048	3.31812	-7.11462	1.359	-6.53153	2.24564	5.85498		-0.541277	4.82262	-1.56214	-4.23147	-0.0120229	3.6288	1.56265	1.92585
58.5		1.34742	5.08935	4.62594	3.75494	1.07588	-5.40541	-3.02156	-2.46219		-1.74754	3.06633	2.51743	0.0580671	-2.01502	4.21855	0.240512	3.24586
59.5		3.65077	-1.76431	4.62594	2.7668	3.62401	-4.27928	1.62597	1.31834		2.69448	-0.737708	4.95503	5.331	1.6261	3.05263	-0.830323	4.7161
60.5		6.72191	-4.04886	9.85724	4.74308	4.75651	-13.2883	2.24564	5.85498		-0.948896	-0.340692	1.43569	1.22762	-2.55646	6.50504	1.25407	2.77945
61.5		7.48969	11.943	9.85724	-1.18577	2.49151	-6.53153	-0.852709	-0.193874		1.37394	5.27467	6.53903	-0.40952	1.94699	5.71141	-3.74473	-4.49826
62.5		9.40915	6.23162	10.5112	3.75494	1.92525	-5.96847	-3.64123	5.85498		-3.25363	5.03789	7.37076	0.339878	0.000750366	5.121	1.0688	1.19559
63.5		11.3286	10.8007	17.7042	3.75494	1.92525	-2.02703	0.386632	5.85498		-0.68437	-2.13629	7.13965	1.98252	-1.29022	6.48371	-2.46499	3.6913
64.5		7.48969	14.2276	12.4729	-4.1502	0.792752	-2.02703	2.24564	5.85498		-2.03917	0.855031	1.37694	3.11923	-2.454	5.73148	7.25396	2.50729
65.5		10.9447	7.94504	11.1651	-1.67984	0.509626	-1.46396	3.48498	6.61109		-0.683526	0.418079	2.66176	3.48795	-0.61238	2.10783	3.87416	3.78541
66.5		8.25747	11.943	-4.52883	-0.197628	-0.339751	-0.900901	3.48498	5.85498		1.97395	-3.12054	8.39998	0.702319	-5.13293	0.57326	6.79594	2.66252
67.5		7.48969	-8.61796	4.62594	0.790514	-0.339751	-6.53153	7.66776	5.85498		-2.27404	2.51809	-3.68125	-0.397553	-1.05015	2.21701	1.51566	5.90805
68.5		2.88299	2.8048	-0.605354	-2.42095	-0.339751	-4.27928	7.20301	10.3916		2.36827	0.896787	-1.46446	2.28685	2.5491	1.10435	12.6092	3.73906
69.5		-3.25928	1.09138	-5.83665	1.28458	-0.339751	-4.84234	8.13251	8.87941		-0.0441618	2.97045	-4.14863	0.930317	-0.786107	3.12054	1.91847	1.87523
70.5		-2.4915	13.0853	2.01029	1.77866	3.62401	-3.15315	7.82268	5.85498		1.12155	-2.71468	-5.53938	-0.907216	2.80872	4.62532	9.22436	3.45666
71.5		-3.25928	14.2276	7.24159	11.6601	1.359	-6.53153	4.72433	5.85498		-0.116464	-1.6601	-5.4317	-3.37572	0.127786	2.54304	6.45413	4.96258
72.5		1.73131	7.94504	7.24159	3.26087	1.92525	1.35135	5.344	9.63552		0.937405	-2.49071	-1.00523	-0.0723867	0.129414	4.60091	2.3263	4.14233
73.5		3.65077	7.3739	15.0885	3.75494	0.226501	-7.65766	5.96367	5.85498		-1.40705	2.49327	4.81874	2.72056	-3.15136	1.82294	7.81932	5.5121
74.5		0.579639	-2.90658	-1.91318	-1.18577	4.19026	-6.53153	5.344	7.3672		-2.61914	-2.29205	1.39235	-0.499163	-1.03794	6.54976	4.68207	1.42354
75.5		3.65077	2.8048	11.1651	-13.0435	3.62401	-4.27928	7.82268	5.85498		-3.39209	-0.484628	0.992353	-2.94255	0.777003	0.472737	10.2936	4.2977
76.5		2.11521	7.94504	3.31812	1.77866	-0.339751	-1.46396	8.13251	11.1477		3.28736	-0.246188	-1.71415	-0.947124	-3.62141	0.961738	10.9205	6.47665
77.5		3.65077	21.0812	11.1651	-11.0672	-3.73726	-6.53153	8.44235	7.3672		2.99832	0.80222	3.64133	-0.573043	-4.02339	1.04945	-1.64185	3.14173
78.5		11.3286	11.943	13.7807	-5.13834	-3.73726	-3.15315	2.24564	2.83055		2.93303	5.6398	2.90426	-0.714279	-1.12416	2.4157	6.65318	2.70444
79.5		8.25747	8.51617	13.7807	-1.67984	0.438845	-2.59009	5.65383	5.85498		-2.48276	0.61104	0.778687	0.777152	-0.612157	1.25727	7.38062	1.05618
80.5		9.79304	2.8048	4.62594	2.7668	0.226501	1.35135	7.82268	8.87941		0.135997	0.364337	3.9412	2.38439	3.71357	5.01719	11.5875	5.57812
81.5		3.65077	-4.04886	4.62594	7.70751	4.75651	-4.27928	7.82268	5.85498		1.95124	-2.607	-1.63463	-2.97807	1.15875	6.06763	0.117994	0.032003
82.5		0.195747	-1.19317	-9.76012	13.1423	7.30464	-7.09459	7.82268	11.9038		-0.961001	1.21641	-2.00009	2.90333	2.53475	5.19529	8.93325	3.39155
83.5		-4.02706	-8.61796	-14.9914	0.790514	7.02152	-4.27928	8.44235	8.87941		-1.77795	0.242534	-3.82314	-1.06982	2.45255	6.1026	8.2501	1.04293
84.5		-4.02706	-6.33341	-5.83665	2.7668	4.75651	-6.53153	7.82268	7.3672		3.39046	2.58534	1.53959	0.195355	-0.147542	3.95319	5.86177	1.26252
85.5		-3.25928	2.8048	-5.83665	0.790514	1.92525	-2.02703	8.44235	5.85498		-4.52198	-1.56117	2.03183	-0.516497	3.07579	5.58887	6.82186	5.82642
86.5		-2.4915	4.51821	8.54942	-2.17391	1.92525	-2.59009	7.20301	11.1477		-0.816689	2.14325	-1.49535	-2.15216	0.638024	2.50698	5.67206	1.35973
87.5		3.65077	2.8048	-4.52883	-4.1502	2.49151	0.225225	8.44235	13.4161		-3.25022	0.812927	-0.595383	0.367894	-0.678689	5.9879	8.10465	4.20306
88.5		3.65077	8.51617	16.3964	1.77866	1.92525	-6.53153	8.44235	5.85498		-0.366394	0.895536	-1.89938	1.52918	0.135695	5.02805	7.02116	4.88802
89.5		3.65077	8.51617	16.3964	-4.64427	0.226501	-5.96847	8.13251	9.63552		0.751458	-0.58832	5.41061	2.89608	-0.537195	2.42963	8.64306	3.64801
90.5		3.65077	8.51617	0.70247	3.75494	1.92525	-5.40541	8.44235	7.3672		-3.72133	-3.05059	-0.604928	1.89914	-3.12265	2.36933	6.86882	4.53879
91.5		3.65077	8.51617	7.24159	-1.18577	1.92525	-9.90991	8.44235	13.4161		-3.22025	-2.87246	-3.61127	-1.27238	-1.69757	5.61941	9.76581	9.73278
92.5		-4.02706	0.520244	-1.91318	-0.197628	1.92525	-5.40541	7.82268	11.9038		-1.77435	-2.81434	-4.46011	-1.9669	1.22134	5.51061	7.38635	0.783928
93.5		-2.1076	-1.76431	3.97203	0.790514	-1.75538	-9.34685	5.65383	7.3672		-3.82299	-3.1012	-1.98651	-2.50025	-4.23135	4.28106	5.72409	3.47924
94.5		-0.188145	-2.90658	0.70247	-5.13834	-0.906002	-2.02703	0.386632	-1.70609		4.69471	-2.39039	6.16375	-1.07005	-0.317322	2.55409	0.326742	4.06144
95.5		2.88299	6.23162	-1.91318	-11.0672	1.359	0.225225	1.62597	8.87941		-2.95465	-3.48718	2.41535	0.413513	-0.503045	2.03125	6.23589	6.25484
96.5		4.80245	6.80276	2.01029	5.23715	-0.339751	-9.90991	2.24564	10.3916		2.61181	3.60199	2.0765	-0.631879	-4.19176	2.16212	10.7234	3.987
97.5		3.65077	8.51617	-5.83665	-2.17391	-0.339751	-4.27928	2.24564	17.9527		3.13262	-0.864909	2.068	4.17918	-0.895921	3.89877	-0.849351	3.23456
98.5		2.88299	1.66252	-0.605354	-3.16206	-4.44507	-8.78378	4.72433	8.87941		-0.625024	-1.04863	-2.53272	6.53053	-9.77616	0.899554	14.2796	1.34244
99.5		3.65077	-4.04886	-3.221	-15.0198	-9.96602	-2.02703	8.44235	14.9283		-1.75398	1.15434	-1.57653	1.21986	-2.50989	1.65765	6.33634	10.32
100.5		-0.955928	-5.76227	3.31812	-9.09091	-9.39977	-5.40541	4.10466	5.09888		-1.76058	-1.76273	-3.8841	-1.58104	-6.32744	1.39732	3.5065	4.19873
101.5		-4.02706	-8.61796	-8.4523	-16.996	-7.70102	-7.65766	0.386632	-1.70609		-1.22188	1.63636	-9.12871	-2.9974	-5.41381	1.4178	1.75328	-2.82816
102.5		-4.02706	-7.47568	2.01029	-4.1502	-3.73726	-0.900901	0.386632	5.85498		-4.80276	2.94521	-0.330523	-2.53696	-2.75356	-0.382213	9.98213	4.0207
103.5		-4.79485	-9.1891	8.54942	-11.0672	-3.45413	-3.71622	5.03416	7.3672		-2.49693	0.625154	-4.83329	2.74147	-3.08462	2.07854	8.12284	0.30688
104.5		-4.79485	-7.19012	2.99116	-15.0198	-0.906002	-11.036	2.86531	5.85498		1.02511	-0.398529	0.0743373	0.536507	-3.46854	-3.04487	6.24797	3.06237
105.5		-4.02706	-6.33341	-0.605354	-1.18577	-2.03851	-7.65766	3.48498	4.34277		0.175514	-2.67973	-4.77396	-4.07143	-6.57367	1.82735	4.29404	6.14908
106.5		-4.02706	-13.1871	-5.83665	-3.16206	-0.906002	-12.1622	2.24564	5.85498		-2.64031	-2.38756	-0.157654	-0.306593	-1.95032	-0.317075	5.48094	0.272938
107.5		-1.72371	-1.76431	1.35638	-9.58498	-4.86976	-5.40541	2.86531	2.07445		-1.31147	-1.84567	-0.774416	-2.32956	-7.09941	0.412179	7.4874	1.96732
108.5		0.579639	-2.90658	-5.83665	-7.11462	-6.56852	-6.53153	-0.233039	-1.70609		-0.864472	-2.48943	0.12445	-4.7397	-7.73247	-0.670394	9.6268	-1.76336
109.5		-0.188145	-2.90658	4.62594	-13.0435	-5.43601	-7.65766	-3.95106	5.85498		-2.31058	-2.85487	-2.50449	1.72368	-3.49547	-0.625953	7.97482	1.43476
110.5		-3.64317	-0.764816	0.0485578	-3.65613	-6.56852	-3.71622	1.31614	5.85498		-6.29143	-1.46999	-2.52902	1.47097	-3.89338	1.50571	5.53327	2.65756
111.5		-3.25928	-2.90658	-3.221	-8.10277	-5.8607	-6.53153	1.62597	5.85498		-4.15792	-3.60294	3.86734	1.2051	-3.17163	0.964064	-1.61606	-1.70617
112.5		-3.25928	-0.622031	3.31812	-7.11462	-2.03851	-7.65766	-3.95106	-1.70609		0.492386	0.636071	-0.755697	2.59087	-2.58066	-0.550286	7.54465	2.20087
113.5		-2.4915	-5.19113	4.62594	-5.13834	-4.30351	-3.15315	-1.47238	-7.75494		-1.72039	-3.53231	2.33422	0.139913	-1.68271	-2.21255	-2.42285	-3.03535
114.5		0.195747	2.8048	9.20333	-1.18577	-0.622877	-3.15315	1.31614	2.07445		-0.724102	0.420265	-2.24048	1.40324	-3.05484	1.90366	7.75776	1.88747
115.5		0.579639	-2.90658	4.62594	1.77866	-2.60476	-0.900901	-1.47238	1.31834		-1.23859	1.40779	-0.22992	1.2315	-3.15717	3.25864	2.40814	-6.46418
116.5		-2.4915	2.8048	8.54942	-13.0435	-9.39977	-2.02703	-3.33139	2.83055		-4.43881	1.36457	1.50806	-0.135674	-6.13193	0.194511	-1.34666	-0.690918
117.5		3.26688	-2.33544	4.62594	-13.5375	-11.6648	2.47748	-1.70476	2.07445		0.32179	1.23738	-0.638003	-2.90458	-2.70554	-0.292004	2.06532	2.02619
118.5		3.65077	5.08935	0.70247	-22.9249	-1.61382	1.35135	-0.233039	4.34277		0.990799	0.45581	-1.94461	2.02716	-1.06835	2.45177	-1.92203	0.923568
119.5		2.11521	-8.61796	8.54942	-15.0198	-0.906002	-4.27928	-3.33139	4.34277		-2.02978	-1.62785	0.0114847	-0.127128	-4.1697	-3.01594	-0.74503	-1.93043
120.5		0.96353	-0.0508935	-3.221	-0.6917	0.509626	0.788288	-3.33139	-6.0537		-2.22771	0.320594	-1.08609	-1.83175	-4.20686	0.694565	-0.426895	-0.794909
121.5		-4.02706	-4.04886	-3.221	2.7668	1.92525	2.47748	-2.71172	-1.70609		-0.206159	-4.24631	-2.31131	-0.0995145	0.595809	0.791789	5.54707	-0.735071
122.5		-7.86598	2.8048	-8.4523	7.70751	6.45527	1.35135	-3.95106	-6.24273		-1.80835	-5.32725	-4.19119	-1.3175	1.81654	3.4141	-1.63773	-4.53508
123.5		-7.86598	-17.7562	-8.4523	-0.197628	5.88901	-0.900901	-3.95106	-6.24273		-4.72782	-4.6133	-2.37157	-1.43951	-2.73679	2.33781	1.72382	1.4386
124.5		-3.25928	-5.19113	5.27985	5.73123	4.75651	1.35135	-1.39492	1.31834		-0.192636	1.56074	-2.55018	-1.76976	0.778621	5.34253	2.79663	1.11444
125.5		-0.955928	-6.33341	-8.4523	7.70751	4.75651	10.3604	1.62597	5.85498		2.51453	-1.33405	2.49221	-1.81504	3.49213	4.26989	-3.35114	-3.57769
126.5		3.65077	2.8048	11.1651	-0.197628	5.88901	-6.53153	0.386632	-1.70609		1.11814	-0.96738	0.95201	8.74918	-1.41854	6.75172	0.880765	-0.00396898
127.5		5.95412	7.3739	4.62594	6.71937	4.19026	-0.900901	0.0767968	-1.70609		2.82202	0.885749	8.57981	1.12816	-0.2163	5.61407	2.70818	1.00207
128.5		8.25747	8.51617	-1.91318	6.71937	7.02152	2.47748	1.62597	-0.193874		3.25384	1.48261	1.77849	1.69511	-0.963133	3.59145	9.22191	2.06251
129.5		9.02526	7.3739	11.1651	4.74308	7.02152	-0.900901	0.386632	2.83055		-0.863266	0.247262	0.161487	1.64762	-1.6886	3.26612	-5.14029	0.300045
130.5		1.34742	-2.90658	-3.221	5.73123	4.75651	0.225225	-0.233039	-4.73052		5.05534	0.879365	-2.903	3.42949	-2.04609	4.29194	-4.92901	-0.344381
131.5		-1.72371	-5.19113	-4.52883	6.2253	7.02152	1.91441	-3.95106	-9.26716		0.22785	0.894636	-3.96405	-0.297058	0.742787	7.04924	-6.1162	-6.34028
132.5		-4.02706	-2.90658	-1.91318	2.7668	7.58777	4.72973	-4.57073	-3.2183		0.887644	2.50281	-3.60969	-2.00069	-0.83563	3.39733	-1.85691	-2.35382
133.5		-4.02706	-4.04886	-1.91318	9.68379	4.75651	4.72973	-3.95106	1.31834		-3.61219	-2.3668	-2.18197	2.82893	4.29825	4.10943	-3.87449	0.953889
134.5		-5.46666	-1.76431	3.31812	3.26087	5.60589	0.788288	-0.542874	0.562233		-1.34629	0.835162	1.20809	-3.13908	0.280443	5.24602	-1.08988	0.674722
135.5		-4.02706	-8.61796	-7.14448	0.790514	9.28652	1.35135	-1.47238	2.83055		1.45446	5.08181	-2.39057	-2.24184	2.45505	4.00556	0.49253	-3.37934
136.5		-4.02706	-8.61796	-1.91318	-1.18577	7.58777	5.85586	-4.57073	-6.24273		2.52035	-0.923662	0.59181	-2.62506	-1.37697	3.0009	-5.04015	-1.45092
137.5		-4.02706	-2.90658	-8.4523	-5.13834	1.92525	4.72973	-3.95106	-9.26716		1.61892	-1.1838	-2.33353	-1.82127	3.24034	7.49682	5.35035	-0.318579
138.5		-4.02706	-4.04886	-7.79839	2.27273	6.17214	0.225225	-2.40189	-6.99884		1.19347	-1.43695	-2.95034	-0.332436	-0.191104	3.40955	1.20533	-2.45365
139.5		-7.86598	-14.3293	-12.3758	-3.16206	7.58777	-0.900901	-3.95106	-9.26716		-0.817202	-4.82103	-2.45188	1.41105	2.48547	9.44753	-2.12033	-1.14317
140.5		-4.79485	-7.47568	-17.6071	5.73123	7.02152	5.85586	-10.1478	-9.26716		-4.00472	0.381374	-4.12911	2.95937	3.90346	7.24402	-5.36682	-1.11392
141.5		-4.79485	-8.61796	-12.3758	4.74308	8.43715	2.47748	-10.4576	-1.70609		1.04713	1.10864	-4.68653	-1.43966	2.72052	4.18621	-1.81151	-1.58388
142.5		-3.25928	-8.61796	0.70247	6.71937	10.419	1.35135	-6.42974	5.85498		-5.67619	1.59631	-5.63269	0.0536923	-0.695011	9.49436	3.66752	-2.25519
143.5		-0.188145	-0.622031	-13.6836	-1.18577	7.58777	0.225225	-0.852709	5.85498		0.988376	-5.87357	2.88243	5.34689	-1.08599	2.05534	10.8591	-1.83703
144.5		3.65077	-2.90658	-8.4523	0.790514	7.58777	-0.900901	-1.47238	5.85498		2.01043	-1.176	-0.962335	-0.210091	2.82923	4.80346	11.522	-3.2482
145.5		3.65077	5.08935	-5.18274	3.26087	3.62401	4.72973	-3.33139	-3.97441		-2.26351	1.13469	1.81391	1.02241	-2.00327	5.04268	-4.61432	1.72975
146.5		2.11521	2.8048	-8.4523	-2.17391	-0.906002	6.98198	-3.95106	-0.193874		-1.74687	3.127	-2.5363	0.746688	-1.34123	2.96113	0.684392	0.669945
147.5		2.69104	-8.61796	4.62594	-3.16206	-2.60476	5.85586	-3.95106	-1.70609		-1.22481	-3.51759	-5.1024	-0.4289	-1.62374	-1.28789	11.44	-3.5354
148.5		-4.02706	-6.33341	-7.14448	-4.64427	-1.47225	-0.337838	-3.64123	1.31834		-0.830494	-1.36347	-2.82005	-0.485338	0.243517	0.763909	1.07086	2.51392
149.5		-8.63376	-14.3293	-3.221	-11.0672	-3.17101	1.35135	-3.95106	-1.70609		-2.47757	-5.95863	-5.46873	-2.10723	-7.22074	3.4741	-1.66702	1.54569
150.5		-4.02706	-9.76024	-11.0679	-16.996	-6.00227	-0.900901	-3.95106	7.3672		-2.03204	-0.526519	-5.71421	-1.40162	-3.69213	-1.0425	-2.47495	-5.3379
151.5		-4.02706	-2.90658	-8.4523	-13.0435	-2.03851	-0.900901	-3.95106	7.3672		0.945569	-0.661338	0.0322139	0.0708194	-2.93872	-2.52199	-2.80933	-6.15098
152.5		1.34742	-1.19317	-9.76012	2.7668	-1.75538	2.47748	-10.7674	-11.5355		-1.42073	0.239851	-0.312397	-3.57928	-1.91501	1.51789	-6.83398	-3.84104
153.5		3.65077	8.51617	-1.91318	1.77866	1.92525	0.225225	-10.1478	-9.26716		2.08844	3.36485	6.34256	1.92451	-2.04808	7.44841	1.40759	-2.36971
154.5		3.65077	-0.622031	4.62594	4.74308	-0.339751	-4.27928	-5.1904	-1.70609		-1.14122	3.851	-3.81587	-0.819446	1.99989	4.2869	-3.97351	-5.97959
155.5		4.80245	-1.19317	-3.221	-5.63241	1.07588	1.35135	-3.64123	0.562233		0.577614	2.35134	-0.248418	2.1545	0.0807231	5.01178	-0.477458	-2.53581
156.5		2.88299	6.23162	11.1651	-2.17391	0.792752	-0.900901	-3.95106	-6.24273		1.10634	3.33445	-4.8974	-0.353606	-4.84719	-0.442566	-4.62063	-5.19281
157.5		-0.188145	-7.47568	-8.4523	-1.18577	-2.60476	5.85586	-3.33139	4.34277		-1.16032	-3.13076	-1.98914	-1.59121	-6.8435	-1.59989	3.254	-3.47491
158.5		-4.41095	-6.33341	-13.0297	-4.1502	-6.56852	-0.900901	-4.57073	1.31834		-2.90688	2.27439	0.278896	-2.73726	-7.22608	4.18721	-1.30504	-3.73591
159.5		-7.86598	-2.90658	-13.6836	-16.0079	-2.60476	0.225225	-5.1904	2.83055		-4.85478	-1.06814	-2.37566	1.53232	-2.08291	-2.73794	5.18516	2.67668
160.5		-3.25928	-5.19113	-13.6836	-11.0672	-6.56852	-4.27928	-4.57073	10.3916		-1.02907	-3.30051	-6.10653	-7.23058	-5.79527	-0.675344	4.3274	2.42336
161.5		-6.33041	-5.19113	-8.4523	-10.0791	-9.39977	-2.02703	0.386632	11.9038		0.781668	1.68566	-6.11146	-1.47361	-3.89942	-1.28199	-3.38954	-2.40102
162.5		-5.94652	-2.33544	1.35638	-9.09091	-6.85164	2.47748	-0.77525	8.87941		-2.44744	1.69614	-3.06142	-1.52353	-1.07061	0.756858	-3.28356	0.455618
163.5		-4.02706	1.66252	9.53028	-3.16206	-1.47225	1.35135	-10.1478	-1.70609		-2.50415	4.35638	0.884448	-3.8067	-1.54148	3.13189	-4.37245	-9.03691
164.5		2.11521	-7.47568	-7.14448	2.7668	-2.60476	0.225225	-10.7674	-9.26716		-2.07663	0.454457	-2.89989	-6.07808	-2.58111	0.527033	-8.43079	-6.16927
165.5		0.195747	-0.622031	-5.18274	-3.65613	-0.906002	-1.46396	-12.0068	-6.99884		-2.526	-2.12265	-1.09511	-0.153578	-1.78355	1.45	-3.38405	-3.04333
166.5		2.11521	-2.90658	-1.91318	-6.12648	-0.906002	-3.15315	-10.1478	5.85498		-4.57535	-0.541628	-1.93858	-1.39873	-5.42759	2.9357	7.76532	-0.393585
167.5		0.579639	8.51617	-5.83665	-5.13834	-6.56852	-6.53153	-7.04941	2.83055		-1.39039	-2.41386	-4.71935	3.02514	-4.92613	1.86267	-0.608931	-6.59791
168.5		-0.955928	2.8048	-9.76012	-6.12648	-9.39977	2.47748	-10.1478	-9.26716		-3.97633	2.75432	-0.529446	-4.40657	-8.21994	-2.0041	-8.20538	-5.98921
169.5		-0.188145	-4.62	-8.4523	-16.996	-7.70102	-2.59009	-9.5281	3.58666		-4.37498	-2.78803	-4.44248	-2.7596	-4.0997	-0.39293	-4.83338	-2.0157
170.5		-3.25928	2.8048	-1.91318	6.71937	-3.73726	-4.27928	-9.5281	5.85498		-1.10225	2.01859	2.24199	-3.09998	-5.15705	-1.7383	-3.3073	-0.407575
171.5		0.579639	-2.90658	5.93377	-1.18577	-2.03851	-4.27928	-8.90843	1.31834		1.9818	1.64199	2.60333	-5.71723	-4.79545	3.47052	4.0819	-2.50502
172.5		0.96353	2.8048	2.66421	-2.17391	-1.18913	-5.96847	-6.11991	-0.193874		-1.52717	0.601633	2.97187	-0.033509	-0.803675	2.32968	-4.6097	-3.09341
173.5		3.65077	-8.61796	-1.91318	-1.18577	-0.906002	-0.900901	-8.28876	-7.75494		-1.24146	-1.40262	1.52252	0.432769	-0.709668	-0.481088	-9.65102	-5.23438
174.5		3.65077	-5.19113	-0.605354	-3.16206	-0.906002	-0.900901	-5.81007	-7.75494		-2.18633	-1.90815	3.68358	-0.681315	-0.206334	-1.35307	-3.98159	-6.32675
175.5		3.65077	-2.90658	8.54942	-5.13834	-0.906002	-3.15315	-7.04941	-1.70609		0.94279	6.44463	2.97717	0.897238	0.443513	0.584562	-5.77914	2.13074
176.5		0.195747	10.8007	-9.10621	0.790514	1.92525	-5.40541	-5.50024	5.85498		4.20534	-1.34999	4.50055	2.28348	0.470066	2.16548	-2.9408	-3.16496
177.5		-0.188145	-2.90658	-8.4523	1.77866	3.05776	-4.27928	-3.95106	5.85498		-1.12381	-3.0285	0.56707	1.25378	-1.31666	2.3312	0.616486	-8.06167
178.5		1.34742	-4.04886	-1.91318	-1.18577	1.359	1.35135	-5.81007	-0.193874		0.268156	-0.564695	-0.289353	2.9453	-1.90516	-2.50627	-12.9755	-2.52318
179.5		0.195747	3.94707	-5.83665	-3.65613	0.226501	1.35135	-10.1478	-5.48662		-3.07839	1.22518	-1.81834	-0.315336	-2.96747	1.1275	-6.86614	-3.75082
180.5		-3.25928	8.51617	0.70247	-5.13834	-0.906002	2.47748	-11.3871	-9.26716		1.01487	-0.855897	-4.39702	1.7451	-3.2316	3.42039	-9.82208	-6.89059
181.5		-5.56263	2.8048	-11.0679	4.74308	1.92525	-4.27928	-15.7248	-10.7794		-1.8359	0.309696	2.28706	-0.812307	-1.17291	4.51945	-8.56122	-9.10648
182.5		-4.79485	-2.90658	2.01029	-2.17391	1.92525	0.225225	-12.6264	-9.26716		-1.92777	-2.06323	-9.42632	-1.62107	-1.39117	4.06165	-3.80291	-4.34872
183.5		-4.41095	-2.90658	-9.76012	4.74308	1.92525	-0.337838	-9.21826	-0.760954		-3.4275	-1.57684	-6.61439	1.7908	0.844176	1.53735	-7.04513	-7.97116
184.5		-4.79485	6.23162	-1.91318	3.75494	1.92525	1.35135	-13.2461	-9.26716		-1.29476	-0.127528	-5.04486	-2.70875	-1.6398	3.3329	-2.42836	-10.7005
185.5		-4.02706	-8.61796	-4.52883	3.75494	1.92525	-7.65766	-10.1478	-1.70609		-3.4508	-1.45176	-1.23353	-2.91317	0.171006	0.389006	0.111433	-6.18924
186.5		-2.1076	-4.62	-1.91318	-4.64427	0.509626	0.788288	-8.28876	-4.73052		-1.38241	-1.93289	0.441259	-4.27283	-0.546186	-1.57322	-6.46017	-2.84386
187.5		-3.06733	-2.90658	-1.91318	6.71937	-0.906002	6.98198	-5.81007	-0.193874		-0.915732	3.0451	0.209234	-1.29052	0.577923	6.2624	-3.39576	-2.60496
188.5		-7.0982	-8.61796	-11.0679	5.73123	4.75651	1.35135	-3.95106	-9.26716		-4.12807	-0.0631559	-8.83059	4.07478	0.846226	0.631717	-3.75489	-4.28956
189.5		-4.02706	-7.47568	-14.9914	3.75494	-0.339751	-3.15315	-7.66909	-9.26716		-0.0419418	-3.30668	0.40018	-0.898372	-2.05555	5.27027	-6.78337	-3.49619
190.5		-4.02706	-9.76024	-6.49056	0.296443	2.49151	-0.337838	-9.83793	-9.26716		-2.07352	-2.87772	-3.42258	2.37059	1.87113	1.59711	-5.88594	-7.1298
191.5		-6.33041	2.8048	-14.9914	2.7668	-0.906002	-4.27928	-7.66909	5.85498		1.6748	-0.317163	-1.50907	-1.77566	-5.82992	-1.16572	-4.28949	-7.52237
192.5		-4.02706	-0.622031	-8.4523	-5.13834	-6.00227	0.225225	-6.42974	1.31834		-1.88051	-1.78219	-0.871596	2.71569	-4.46766	0.365994	-4.95578	-3.4701
193.5		-0.955928	-2.90658	-3.221	-0.6917	-2.32163	-0.337838	-7.35925	-9.26716		-1.4222	-2.69755	-2.38705	0.233493	-1.80106	2.92443	-9.23543	-7.88355
194.5		3.65077	-2.90658	-1.91318	4.74308	4.19026	2.47748	-3.95106	-4.73052		-4.16278	-2.15971	5.0805	-2.25687	7.70672	7.41881	-3.08361	-5.6116
195.5		3.65077	-1.76431	-9.76012	8.69565	1.92525	-4.27928	-5.1904	-0.193874		2.53557	-2.92571	2.45643	2.14681	1.3043	5.47563	-6.22656	-6.26021
196.5		-0.188145	8.51617	-1.91318	-2.17391	1.359	5.85586	-2.71172	2.83055		1.92682	-3.21431	-0.762157	3.62149	2.25544	4.00287	0.125667	-7.00609
197.5		-0.188145	-8.61796	-8.4523	-1.67984	-0.906002	4.72973	-6.42974	-5.48662		-0.816192	-2.22063	-1.61958	-0.0978849	-2.15212	0.334478	-5.53406	-3.19943
198.5		-3.25928	-8.61796	-13.6836	-2.17391	-8.83352	3.6036	-11.3871	-9.26716		-1.91701	-0.409584	-4.30908	-2.66851	-5.45122	0.702605	-4.92768	-4.49122
199.5		-4.02706	-6.33341	-13.6836	-9.09091	-7.13477	-7.65766	-10.1478	-1.70609		2.52757	-5.31817	-0.517799	-5.92786	-4.09539	-0.0489002	-0.557414	-3.34079
200.5		-1.72371	-5.19113	-7.79839	-5.13834	-4.30351	-3.71622	-4.88057	3.58666		-1.55438	-0.643802	1.96708	-1.06358	-1.43489	2.18419	-0.922861	-6.09956
201.5		3.65077	2.8048	-9.76012	1.77866	-0.339751	-0.900901	-3.95106	-1.70609		-0.510496	-2.80994	2.18831	0.492616	-0.905806	-0.928471	6.01891	0.0589875
202.5		2.11521	8.51617	2.01029	0.790514	3.05776	4.72973	-0.852709	-0.193874		-3.37827	-3.8812	-2.10763	0.237567	5.62322	0.166154	-3.7894	-3.64316
203.5		-0.188145	-0.0508935	-3.221	5.23715	2.77463	0.788288	-1.78221	-0.949981		-1.73056	-4.12966	1.77993	-1.29448	1.13415	4.91616	3.30511	-2.38917
204.5		3.65077	0.520244	-8.4523	5.73123	6.45527	2.47748	-2.71172	-1.70609		0.653814	2.11126	6.30346	6.80545	1.74615	5.95877	-1.55994	2.70981
205.5		3.65077	11.943	-1.91318	14.6245	3.62401	1.35135	2.24564	7.3672		1.82284	-2.2913	6.7675	2.25196	1.27953	5.07666	0.801129	-1.74033
206.5		4.41856	-1.76431	-3.54796	8.69565	7.58777	5.85586	2.24564	5.85498		1.67413	-3.23604	6.19191	-0.980718	3.12983	7.98138	9.08373	-1.66877
207.5		9.31318	-1.19317	-1.91318	6.71937	6.17214	3.04054	2.24564	10.3916		1.31215	1.03993	6.74335	-1.06445	3.21753	5.98124	7.9655	-0.179113
208.5		7.48969	2.8048	5.93377	3.75494	7.58777	6.98198	2.86531	8.87941		1.00524	0.938125	7.05814	1.02554	-0.328681	2.14807	4.87169	0.623802
209.5		7.48969	2.8048	-1.91318	6.71937	5.32276	2.47748	3.48498	5.85498		4.47071	2.64314	3.21274	3.30094	-0.44654	4.00301	-1.58315	-3.46694
210.5		0.195747	-2.90658	-3.87492	6.2253	4.19026	1.35135	3.17515	9.63552		0.348719	2.52181	-3.75956	1.57908	0.372206	5.56338	10.4361	5.26641
211.5		-2.4915	-8.61796	-9.76012	-1.18577	4.19026	0.225225	6.58334	7.3672		-0.207693	0.94954	-2.11735	1.48007	2.27964	1.66253	5.52534	4.76896
212.5		-4.79485	-2.90658	-8.4523	-7.11462	1.92525	6.98198	3.48498	10.3916		-1.07789	0.480902	-8.27908	0.811916	-0.568619	1.78635	8.49707	10.5732
213.5		-1.72371	-2.90658	-3.221	-12.0553	-5.43601	-5.40541	7.82268	8.87941		-2.88863	1.99445	2.52482	1.76133	-3.391	1.35964	1.76904	3.98933
214.5		-3.64317	-8.61796	-14.3375	-9.09091	-6.56852	2.47748	8.13251	11.9038		-1.71063	0.0727471	-5.8099	-0.777174	-3.20419	2.95784	7.87062	6.72227
215.5		-7.0982	-6.33341	-1.91318	-5.13834	1.92525	1.35135	7.82268	5.85498		-1.29252	-3.22027	-0.8206	-4.8646	-3.54107	0.771237	3.78413	4.81589
216.5		-4.79485	-6.33341	-9.76012	-2.17391	0.792752	2.47748	6.58334	5.85498		-1.0893	-7.18627	-3.95297	0.389673	-0.121082	3.88072	3.32436	3.96357
217.5		-5.17874	-5.19113	-3.221	-1.18577	-1.18913	1.35135	6.2735	10.3916		-3.05468	2.3875	-4.72494	2.56254	0.184894	2.2831	3.56866	3.26147
218.5		-7.86598	-14.3293	-4.52883	-0.197628	4.75651	0.225225	6.58334	10.3916		-3.4117	0.746819	-8.53307	2.497	-1.55425	8.74013	2.83144	5.8277
219.5		-7.86598	-8.61796	-5.83665	2.7668	1.92525	3.6036	7.82268	11.9038		0.763357	-2.26387	-0.13417	-5.81505	-1.95317	2.10305	9.49114	4.81706
220.5		-2.4915	-7.47568	-1.91318	-3.16206	4.19026	5.85586	8.44235	10.3916		-1.05975	-3.74437	2.24627	-0.634176	-4.55871	3.54047	7.59401	7.81108
221.5		0.579639	-3.47772	2.01029	-2.17391	3.05776	-3.15315	9.37186	13.4161		-1.62013	-4.01063	-3.23339	-0.982295	-2.30365	2.6023	6.98721	7.24459
222.5		6.72191	8.51617	-0.605354	-3.16206	3.05776	0.225225	11.5407	10.3916		-0.133724	-0.836019	4.38647	2.41983	-1.50163	1.40457	5.68763	8.57039
223.5		7.48969	2.8048	-5.83665	0.790514	-0.906002	1.35135	9.06202	10.3916		4.53635	-0.222626	-1.68269	0.805645	-3.20554	3.22146	6.98831	7.33852
224.5		4.41856	-1.19317	-0.605354	-11.0672	-5.43601	3.04054	11.2309	12.6599		-2.47863	-2.28567	-0.92448	1.50811	-4.29677	1.6585	10.364	8.74206
225.5		-0.188145	1.66252	-8.4523	-13.0435	-10.5323	1.35135	12.1604	13.4161		-0.379753	-0.153011	-0.76049	-2.64143	-2.65441	0.346447	14.2706	4.16902
226.5		-7.0982	-8.61796	-8.4523	-14.0316	-9.39977	-3.15315	12.78	14.9283		-3.20086	-1.68772	-12.2065	1.67455	-3.25248	-0.217299	6.10072	9.48399
227.5		-11.7049	-21.183	-13.6836	-18.9723	-0.906002	0.225225	13.3997	14.9283		-2.49138	-4.08714	-2.86661	-2.26169	-2.56137	0.541065	3.80383	5.21995
228.5		-11.7049	-8.61796	-10.414	-24.4071	-3.45413	-0.337838	12.1604	11.1477		-3.76437	0.969388	-4.49971	-0.859157	-1.46758	1.17992	9.39006	6.8556
229.5		-10.1693	-2.90658	5.93377	-5.13834	-4.30351	-3.15315	10.921	13.4161		0.0448937	0.543683	-4.43316	-1.22996	-0.678719	2.28428	10.8862	6.29122
230.5		-6.33041	-5.19113	4.62594	-4.1502	-2.60476	-0.900901	8.44235	10.3916		-2.36278	0.779885	-5.85888	-2.60612	-5.94151	-1.23479	8.00924	5.97044
231.5		2.4991	-8.61796	-1.91318	-6.12648	0.509626	2.47748	10.6112	13.4161		-2.30601	-0.178169	-1.34684	-1.06227	0.471797	2.16928	3.92055	6.48456
232.5		0.579639	-8.61796	4.62594	1.77866	1.92525	2.47748	8.44235	7.3672		-3.73468	3.74928	-1.74243	1.86301	-3.17748	1.11955	8.15125	11.8998
233.5		3.65077	-7.47568	4.62594	5.73123	3.05776	0.225225	6.58334	13.4161		-1.10567	0.374614	-3.72589	-2.48911	0.142517	6.7878	4.0016	5.63239
234.5		2.88299	-9.76024	2.01029	-0.197628	4.75651	-0.900901	7.82268	7.3672		-4.51659	0.877873	0.012533	-2.21775	-0.934883	3.31019	3.33377	7.66361
235.5		-0.572037	-9.1891	-2.56709	7.21344	3.62401	0.225225	8.13251	11.1477		-2.31209	-2.29411	-0.0810644	1.38972	-1.57317	4.13572	14.0669	6.67243
236.5		-0.955928	-1.76431	-9.76012	6.71937	3.05776	-4.27928	8.44235	10.3916		-2.33844	7.65437	-1.9934	2.78693	-0.965454	4.85254	9.46022	9.83215
237.5		-0.188145	2.8048	9.85724	13.6364	6.45527	1.35135	9.68169	20.9771		0.527102	1.40385	2.38962	-2.06438	0.806978	3.73928	5.40776	1.86046
238.5		3.26688	2.23366	2.66421	1.77866	7.30464	2.47748	10.6112	17.1966		-1.42322	-1.57565	0.946237	-0.85388	0.651793	6.65138	15.5044	6.40763
239.5		4.41856	-2.90658	8.54942	8.69565	1.92525	3.6036	11.5407	17.9527		-0.717645	-3.261	4.45415	2.34433	-1.92188	4.18369	7.50263	10.7175
240.5		3.65077	-7.47568	-8.4523	5.73123	7.58777	4.72973	14.0194	17.9527		-0.992928	-3.26074	-2.60851	-2.54836	-2.62407	3.66143	13.296	6.4517
241.5		-1.72371	-2.90658	-4.52883	1.77866	5.60589	3.6036	10.6112	17.0076		-1.76569	-0.153012	-3.12217	0.25394	-0.4209	4.21331	10.1002	7.75667
242.5		-3.25928	-2.90658	-3.221	-0.197628	1.92525	1.35135	10.921	7.3672		-0.557683	-2.32937	1.33651	-1.44972	-2.16871	4.7517	7.64009	11.4447
243.5		-3.25928	-2.90658	2.01029	-1.18577	1.92525	-0.900901	8.44235	11.9038		-2.69388	2.41454	-2.5742	-0.726703	0.203954	4.08802	9.59215	5.30031
244.5		-0.955928	-2.90658	4.62594	-1.18577	1.92525	-4.27928	8.44235	7.3672		-1.17306	0.348541	-6.62561	-1.51774	2.97621	2.58418	11.0354	10.1883
245.5		1.34742	-0.0508935	7.8955	0.790514	3.34088	3.04054	9.06202	11.9038		1.4317	-2.43984	0.404762	-0.694316	-0.21711	5.63558	10.7443	12.5387
246.5		3.65077	-2.90658	-1.91318	6.71937	1.92525	-4.27928	8.44235	8.87941		1.83048	-4.07134	-0.52193	-0.2857	2.7149	9.78547	11.1796	9.2537
247.5		3.65077	-2.90658	-8.4523	4.74308	6.45527	1.35135	8.44235	14.9283		0.308937	2.09453	2.43936	3.78732	1.49219	7.3768	16.9901	7.03821
248.5		2.88299	4.51821	9.85724	5.73123	6.73839	0.788288	9.99153	12.6599		-2.13035	4.17259	1.57554	0.804807	1.30998	8.43072	7.04929	6.72025
249.5		-1.72371	-8.61796	4.62594	0.790514	0.792752	-2.02703	8.44235	5.85498		0.380524	-6.01467	-1.3542	-1.14559	-0.456536	3.99499	10.9304	6.62647
250.5		-0.188145	-2.90658	-0.605354	4.74308	0.226501	-4.27928	8.44235	7.3672		0.32383	-0.687271	-1.68402	-0.676427	1.63831	6.02382	7.05216	6.23586
251.5		0.579639	-8.61796	-5.83665	1.77866	0.792752	-0.900901	8.44235	7.3672		-0.166442	-0.111993	0.429387	-1.80216	2.84132	-2.55056	9.71938	8.44346
252.5		0.96353	-1.19317	11.1651	-3.65613	3.62401	-1.46396	8.44235	10.3916		-3.03862	0.428358	-1.02846	6.51912e-05	-2.5614	1.62476	7.34608	8.89624
253.5		-2.4915	-2.90658	0.70247	0.790514	1.359	2.47748	8.44235	19.4649		-1.19612	-3.24533	-0.459783	-0.134603	-1.7877	6.75907	9.79895	4.63637
254.5		-3.25928	-12.0448	12.4729	-0.197628	4.19026	-4.27928	8.44235	14.9283		-2.05032	3.18968	-0.954304	0.912552	-1.28843	6.62302	8.75003	6.66857
255.5		-3.25928	-1.76431	-1.25927	-2.17391	6.17214	-0.337838	8.44235	7.3672		-2.65924	0.797746	0.0961669	1.75191	2.10262	3.32008	11.7092	7.4092
256.5		-3.25928	-2.90658	4.62594	2.7668	5.32276	-4.27928	7.82268	5.85498		0.374038	-1.83345	-5.43427	-1.11084	-1.44123	1.34118	2.52202	7.21901
257.5		-3.25928	-7.47568	-1.91318	6.71937	2.49151	1.35135	7.82268	5.85498		2.0148	-0.333038	2.92005	-2.06556	4.87435	0.236155	2.50505	8.91524
258.5		-4.02706	-2.90658	2.01029	0.790514	4.75651	-3.15315	3.48498	5.85498		-0.734718	-5.68027	3.63446	-1.43537	0.504528	1.42202	4.87102	5.33813
259.5		0.579639	-6.33341	-5.18274	2.27273	5.03964	-2.02703	2.86531	5.85498		-2.16501	-0.629601	1.04782	-0.977229	2.52051	5.57449	4.26318	4.51219
260.5		3.65077	2.8048	-9.76012	-2.17391	1.92525	-3.15315	2.24564	1.31834		4.53544	-3.246	-0.853942	-1.90968	3.19636	4.89898	2.41987	1.92852
261.5		2.88299	-8.61796	3.31812	-16.0079	1.92525	2.47748	-3.95106	-9.26716		2.28457	-3.33502	1.1859	-2.33277	-2.42941	2.04477	-1.47847	1.25602
262.5		0.579639	2.8048	2.66421	0.296443	-2.32163	-3.15315	-4.2609	-2.46219		-3.07298	-1.11923	3.26348	-0.574881	-4.89752	4.27212	0.20075	0.414525
263.5		-3.25928	0.520244	0.70247	-6.12648	-2.60476	-2.02703	-2.09205	1.31834		1.14858	-3.15706	-1.31247	-1.20244	-4.27064	5.22083	1.98764	5.72254
264.5		-0.955928	2.8048	-3.221	-4.1502	-1.47225	-7.65766	-1.47238	1.31834		-2.51461	1.44434	-3.02065	-1.54126	-5.75801	0.375947	2.86115	2.00514
265.5		-0.955928	2.8048	3.31812	-4.1502	-1.47225	-8.78378	-3.95106	-9.26716		-1.21002	-0.912234	-0.534157	1.2122	-2.08919	0.65392	-5.2927	-0.71039
266.5		3.26688	-8.04682	-3.87492	-13.5375	1.92525	-4.27928	-4.2609	-6.99884		-1.88117	-1.40156	0.539238	0.355328	-1.18288	1.70449	-0.557523	-3.04966
267.5		3.65077	-7.47568	11.1651	-8.10277	0.226501	0.225225	-2.09205	5.85498		-2.795	-0.252003	-3.32677	-0.0554549	0.299751	-1.24078	6.77281	0.600552
268.5		-0.188145	-5.19113	4.62594	-1.18577	1.92525	4.72973	-2.09205	5.85498		-3.37801	-0.358669	-0.628055	0.072811	-0.493009	0.0335881	0.464693	3.24295
269.5		-0.188145	1.66252	2.66421	-2.17391	3.34088	-3.15315	1.0063	0.562233		4.73385	1.61121	2.84472	-1.08691	-1.183	4.29221	0.291892	5.6375
270.5		5.95412	5.08935	-1.91318	-3.16206	1.92525	-14.4144	4.72433	2.83055		-1.97079	-1.19605	5.25711	-0.964264	-3.37221	3.53533	-1.39323	4.68863
271.5		4.41856	-13.1871	-1.91318	-3.16206	1.92525	5.85586	2.24564	5.85498		-2.53772	8.639	0.73767	3.96338	-4.55736	0.230558	1.47529	0.000904694
272.5		1.34742	0.520244	7.24159	-2.17391	1.92525	2.47748	1.0063	-1.70609		2.6584	3.00583	-0.960306	3.87806	0.374389	3.08135	2.15054	-0.68216
273.5		-0.188145	-8.61796	-6.49056	-7.6087	-0.339751	-2.59009	2.86531	2.83055		1.07342	-0.241305	0.0342631	-1.40165	3.25199	1.27503	2.76551	3.61146
274.5		2.88299	-8.61796	-1.91318	6.71937	1.92525	-3.15315	1.62597	-7.37689		-3.96849	-1.52868	-1.04363	-3.32836	2.82875	0.596612	-6.02773	5.90597
275.5		2.88299	2.8048	-14.9914	-5.13834	1.92525	-4.27928	-2.09205	-4.73052		3.28673	0.205177	3.13331	1.13295	-7.01272	2.3642	-2.41986	3.58806
276.5		-1.62774	2.8048	-4.52883	-7.6087	-1.18913	-3.15315	1.31614	-6.24273		-0.721692	0.274597	0.547856	1.21321	-1.15927	1.85235	-3.42985	1.23388
277.5		0.579639	-2.90658	-7.14448	-9.09091	-3.17101	-8.78378	1.62597	-0.193874		0.174816	-0.91992	7.58985	-6.28702	-5.3514	-1.71397	2.48829	3.81242
278.5		0.579639	-1.76431	11.1651	-11.0672	-3.73726	-3.15315	2.24564	-3.2183		-0.144859	1.31582	2.02557	6.40459	-5.77267	-1.63195	5.57814	0.314611
279.5		1.73131	-5.76227	1.35638	-7.6087	-2.60476	-4.84234	2.86531	0.373207		-0.513188	-0.322629	1.23585	2.75347	0.131019	-1.82031	6.96403	-0.557275
280.5		-0.188145	-8.61796	-4.52883	-7.11462	-2.60476	-4.27928	2.24564	-1.70609		3.11344	7.73259	0.159012	-0.0830805	2.83312	2.39696	0.492244	2.60539
281.5		-4.79485	-1.76431	-14.9914	-18.9723	1.92525	-5.40541	4.72433	-3.2183		-2.69331	-0.662097	-7.07692	-1.92199	-1.32386	0.998351	2.52751	1.65885
282.5		-6.33041	-4.04886	-1.91318	-10.0791	1.359	-2.02703	1.0063	-10.7794		-1.09016	-4.19359	0.516855	1.40851	-1.42956	2.56425	-5.49129	-0.70873
283.5		-3.25928	-0.622031	-11.0679	-0.6917	1.359	-4.84234	-4.88057	-11.5355		-1.88202	-3.08525	-2.2436	0.34346	-2.4077	1.20461	-5.25077	-3.11136
284.5		-0.955928	-0.622031	-7.14448	-1.18577	4.75651	3.6036	-3.95106	-1.70609		1.93072	3.30038	-2.22893	-0.226975	2.23229	1.72404	-8.63485	-6.87538
285.5		0.579639	14.2276	4.62594	6.71937	6.45527	-9.90991	-3.95106	-3.2183		-2.84408	1.38769	4.90049	-0.697536	-1.21124	5.25192	-1.47506	-0.852204
286.5		3.65077	9.08731	2.01029	2.7668	4.19026	-2.59009	-3.64123	-9.26716		-0.755725	-0.162835	1.16306	-1.14311	0.143406	2.78997	-6.4856	-0.780454
287.5		3.65077	2.8048	4.62594	-2.17391	5.88901	2.47748	-2.71172	-9.26716		-0.498281	-0.711874	0.482343	1.54554	0.873094	2.24841	4.85414	-4.12203
288.5		3.65077	-0.622031	-1.91318	6.71937	4.75651	-4.27928	-2.71172	-4.73052		-4.92406	0.0182389	-1.75658	0.390992	0.787518	1.71298	-5.35825	-4.23224
289.5		-0.188145	1.66252	-8.4523	-3.16206	0.226501	1.35135	-3.95106	-7.75494		-2.69791	-3.51303	-5.98802	-1.17678	-3.21559	2.96762	-11.1297	-0.568729
290.5		-0.955928	-1.76431	1.35638	-0.197628	1.359	1.35135	-3.95106	-9.26716		0.601437	-2.51904	1.61234	1.43214	-0.383671	0.256955	-4.28669	-1.99477
291.5		-0.955928	-0.622031	9.85724	5.73123	1.92525	-3.15315	-3.33139	-7.75494		-0.0324878	3.82235	-3.84354	-1.08264	0.790424	7.03514	-6.19085	-5.26508
292.5		1.34742	2.8048	-8.4523	-0.197628	1.92525	-3.15315	-3.95106	-7.75494		1.31034	4.54905	-3.52054	-5.58709	0.989412	1.07478	-5.92964	-3.80342
293.5		-0.955928	-5.76227	-1.7497	3.75494	4.47339	-0.900901	-0.852709	-0.193874		-1.26571	-1.59034	-2.49013	-0.550987	0.09928	5.47886	0.736841	-2.8189
294.5		-4.02706	-7.47568	-8.4523	-1.18577	3.62401	-4.27928	1.62597	2.83055		2.51226	-0.892809	0.993053	0.220517	0.282282	4.36196	2.47029	-4.60263
295.5		-4.02706	-2.90658	-8.4523	-2.17391	4.75651	-3.15315	1.62597	-3.2183		0.811275	-3.37068	-4.11702	1.12297	-2.23683	1.07983	0.453393	2.89519
296.5		-4.02706	-8.61796	-3.221	-0.197628	1.92525	2.47748	1.62597	-1.70609		-5.41696	1.87351	-6.4508	-3.55917	-1.75298	0.249823	-2.18393	-3.74972
297.5		-4.41095	-3.47772	-4.52883	-5.63241	1.07588	-3.15315	1.31614	5.85498		0.287761	-3.69104	-3.33334	0.995558	-3.6482	3.62291	-0.77585	-0.843215
298.5		-3.25928	-7.47568	-4.52883	-6.12648	1.92525	-2.02703	0.386632	2.83055		-5.56931	0.554155	-5.31394	0.26779	-4.88542	0.538952	-0.867304	1.01976
299.5		-0.188145	2.8048	-4.52883	-4.1502	0.226501	-3.15315	1.62597	2.83055		-0.80619	-3.81406	-2.42358	1.24474	-3.14057	6.82208	1.88146	0.657666
300.5		-1.33982	-6.33341	-6.49056	-3.65613	-2.03851	3.04054	-0.542874	-6.24273		-2.35161	-2.14479	-4.72538	-0.419075	-3.21313	-0.348048	-3.88704	-1.50453
301.5		-0.188145	-2.90658	-4.52883	-16.0079	-4.86976	2.47748	-4.57073	-9.26716		-6.91557	0.596857	0.731678	0.19343	-4.71988	-1.6924	-3.25629	-3.59046
302.5		-3.25928	-2.90658	-7.14448	-5.13834	-6.00227	-4.27928	-5.1904	-4.73052		-1.9535	2.302	-0.752113	-5.50972	-6.18233	-0.444731	0.0557609	2.35594
303.5		0.579639	0.520244	-1.91318	-11.0672	-6.56852	-9.90991	-2.71172	5.85498		-7.85121	2.46899	-1.23024	-1.19362	-3.96707	-0.607577	1.47777	4.11448
304.5		0.195747	-2.33544	-8.4523	-15.0198	-6.56852	-4.84234	0.386632	6.61109		-1.7959	0.806568	-3.06244	-3.86919	-5.3254	0.675749	1.50659	-0.534776
305.5		-2.4915	-1.76431	-1.91318	-5.13834	-5.43601	-6.53153	-3.17647	5.85498		-2.56119	-1.49721	0.598292	-3.00648	-7.34456	-1.38285	3.93814	-0.161671
306.5		-4.79485	-5.19113	-7.14448	-9.09091	-0.906002	-5.40541	-3.33139	-0.193874		1.45728	0.429205	5.18519	-4.73262	-6.00519	3.54131	4.37385	-1.02891
307.5		-5.94652	-11.4736	-7.79839	-8.10277	-5.15289	-2.02703	-3.95106	0.562233		0.0981176	1.71407	-2.91152	-3.34269	-3.82673	2.40072	-4.98441	-3.14878
308.5		-7.0982	-2.90658	-1.91318	-13.0435	-5.8607	-4.27928	-10.9224	-9.26716		-2.1395	-4.75504	4.40618	-0.929859	-4.10966	1.91985	-9.7199	-5.18896
309.5		-4.02706	1.66252	-1.91318	-15.0198	-6.56852	-4.27928	-16.3445	-15.316		0.292676	-7.1587	-2.81243	-0.330642	0.123378	-2.17514	-14.957	-5.61163
310.5		-7.0982	-4.04886	-7.14448	-15.0198	-6.00227	-8.78378	-14.4855	-10.7794		-4.39692	-3.17001	-2.96026	-2.15064	-3.08205	0.158878	-10.3179	-2.96484
311.5		-2.4915	-4.62	4.46246	-9.09091	-3.17101	-5.40541	-8.90843	-0.193874		-4.69745	-6.5111	2.77401	-0.352332	-8.29434	1.67239	-0.809302	-2.17195
312.5		-0.188145	3.94707	-8.4523	-15.0198	-6.56852	-3.15315	-7.04941	-1.70609		1.26658	-4.54064	1.55772	-1.29539	-3.51615	-2.99323	-7.06319	-5.58935
313.5		NaN	NaN	NaN	-13.0435	-9.96602	-4.27928	-7.66909	-1.70609		NaN	NaN	NaN	NaN	-0.998193	-1.61311	-8.10505	-2.56993
314.5		NaN	NaN	NaN	NaN	NaN	NaN	-3.33139	-0.193874		NaN	NaN	NaN	NaN	NaN	NaN	-1.76224	-1.27052
315.5		NaN	NaN	NaN	NaN	NaN	NaN	-2.71172	-0.193874		NaN	NaN	NaN	NaN	NaN	NaN	-4.80144	-5.85777
316.5		NaN	NaN	NaN	NaN	NaN	NaN	-3.95106	-7.75494		NaN	NaN	NaN	NaN	NaN	NaN	-1.8519	-4.32176
317.5		NaN	NaN	NaN	NaN	NaN	NaN	-2.71172	2.07445		NaN	NaN	NaN	NaN	NaN	NaN	-1.53807	-4.53095
318.5		NaN	NaN	NaN	NaN	NaN	NaN	-0.233039	5.85498		NaN	NaN	NaN	NaN	NaN	NaN	-2.42923	-2.02922
319.5		NaN	NaN	NaN	NaN	NaN	NaN	-0.852709	2.83055		NaN	NaN	NaN	NaN	NaN	NaN	0.00757498	0.720451
320.5		NaN	NaN	NaN	NaN	NaN	NaN	1.0063	4.34277		NaN	NaN	NaN	NaN	NaN	NaN	-0.479765	0.124082
321.5		NaN	NaN	NaN	NaN	NaN	NaN	-1.78221	-1.70609		NaN	NaN	NaN	NaN	NaN	NaN	-0.367533	-3.60402
322.5		NaN	NaN	NaN	NaN	NaN	NaN	-2.71172	-4.73052		NaN	NaN	NaN	NaN	NaN	NaN	-6.59835	-1.87167
323.5		NaN	NaN	NaN	NaN	NaN	NaN	-0.852709	-3.2183		NaN	NaN	NaN	NaN	NaN	NaN	-4.93633	-4.81569
324.5		NaN	NaN	NaN	NaN	NaN	NaN	1.31614	-1.70609		NaN	NaN	NaN	NaN	NaN	NaN	-1.75663	-0.574444
325.5		NaN	NaN	NaN	NaN	NaN	NaN	2.24564	1.31834		NaN	NaN	NaN	NaN	NaN	NaN	3.55258	-5.59087
326.5		NaN	NaN	NaN	NaN	NaN	NaN	3.48498	7.3672		NaN	NaN	NaN	NaN	NaN	NaN	2.48675	-2.29299
327.5		NaN	NaN	NaN	NaN	NaN	NaN	4.10466	5.85498		NaN	NaN	NaN	NaN	NaN	NaN	8.14619	-1.69607
328.5		NaN	NaN	NaN	NaN	NaN	NaN	4.10466	2.07445		NaN	NaN	NaN	NaN	NaN	NaN	0.936549	-0.413228
329.5		NaN	NaN	NaN	NaN	NaN	NaN	5.344	2.83055		NaN	NaN	NaN	NaN	NaN	NaN	-5.9563	-1.99612
330.5		NaN	NaN	NaN	NaN	NaN	NaN	7.82268	4.34277		NaN	NaN	NaN	NaN	NaN	NaN	2.99152	-4.14817
331.5		NaN	NaN	NaN	NaN	NaN	NaN	6.89317	5.85498		NaN	NaN	NaN	NaN	NaN	NaN	3.54525	-1.05988
332.5		NaN	NaN	NaN	NaN	NaN	NaN	7.20301	5.85498		NaN	NaN	NaN	NaN	NaN	NaN	5.26562	-2.72686
333.5		NaN	NaN	NaN	NaN	NaN	NaN	2.24564	2.83055		NaN	NaN	NaN	NaN	NaN	NaN	0.50834	-2.45874
334.5		NaN	NaN	NaN	NaN	NaN	NaN	5.96367	2.83055		NaN	NaN	NaN	NaN	NaN	NaN	4.11647	-6.25004
335.5		NaN	NaN	NaN	NaN	NaN	NaN	4.41449	5.09888		NaN	NaN	NaN	NaN	NaN	NaN	3.33018	-6.2866
336.5		NaN	NaN	NaN	NaN	NaN	NaN	2.24564	1.31834		NaN	NaN	NaN	NaN	NaN	NaN	2.75313	-0.673546
337.5		NaN	NaN	NaN	NaN	NaN	NaN	3.48498	11.5258		NaN	NaN	NaN	NaN	NaN	NaN	2.72298	-4.50511
338.5		NaN	NaN	NaN	NaN	NaN	NaN	4.72433	4.34277		NaN	NaN	NaN	NaN	NaN	NaN	-0.829395	1.93668
339.5		NaN	NaN	NaN	NaN	NaN	NaN	3.48498	4.34277		NaN	NaN	NaN	NaN	NaN	NaN	-3.63512	-3.99786
340.5		NaN	NaN	NaN	NaN	NaN	NaN	2.24564	-0.193874		NaN	NaN	NaN	NaN	NaN	NaN	-2.89753	-3.20454
341.5		NaN	NaN	NaN	NaN	NaN	NaN	2.24564	-1.70609		NaN	NaN	NaN	NaN	NaN	NaN	-7.52013	-4.65726
342.5		NaN	NaN	NaN	NaN	NaN	NaN	-0.233039	-1.70609		NaN	NaN	NaN	NaN	NaN	NaN	-0.847897	-3.62966
343.5		NaN	NaN	NaN	NaN	NaN	NaN	1.62597	4.34277		NaN	NaN	NaN	NaN	NaN	NaN	-0.0792359	-3.0256
344.5		NaN	NaN	NaN	NaN	NaN	NaN	2.24564	-0.193874		NaN	NaN	NaN	NaN	NaN	NaN	3.26766	-3.35369
345.5		NaN	NaN	NaN	NaN	NaN	NaN	1.62597	8.87941		NaN	NaN	NaN	NaN	NaN	NaN	2.3588	-1.81874
346.5		NaN	NaN	NaN	NaN	NaN	NaN	2.24564	-1.70609		NaN	NaN	NaN	NaN	NaN	NaN	0.724499	-2.33255
347.5		NaN	NaN	NaN	NaN	NaN	NaN	2.24564	-0.193874		NaN	NaN	NaN	NaN	NaN	NaN	0.268768	-2.03967
348.5		NaN	NaN	NaN	NaN	NaN	NaN	1.62597	2.83055		NaN	NaN	NaN	NaN	NaN	NaN	-2.68423	1.75513
349.5		NaN	NaN	NaN	NaN	NaN	NaN	2.55548	9.63552		NaN	NaN	NaN	NaN	NaN	NaN	0.0719656	-4.37321
350.5		NaN	NaN	NaN	NaN	NaN	NaN	4.10466	8.87941		NaN	NaN	NaN	NaN	NaN	NaN	6.46325	-1.74244
351.5		NaN	NaN	NaN	NaN	NaN	NaN	3.48498	11.9038		NaN	NaN	NaN	NaN	NaN	NaN	2.83417	1.41537
352.5		NaN	NaN	NaN	NaN	NaN	NaN	5.03416	12.6599		NaN	NaN	NaN	NaN	NaN	NaN	2.50765	1.11589
353.5		NaN	NaN	NaN	NaN	NaN	NaN	2.24564	8.87941		NaN	NaN	NaN	NaN	NaN	NaN	3.73077	-1.07324
354.5		NaN	NaN	NaN	NaN	NaN	NaN	8.44235	11.5258		NaN	NaN	NaN	NaN	NaN	NaN	1.7449	0.784085
355.5		NaN	NaN	NaN	NaN	NaN	NaN	4.72433	10.3916		NaN	NaN	NaN	NaN	NaN	NaN	1.32954	3.78921
356.5		NaN	NaN	NaN	NaN	NaN	NaN	2.86531	6.61109		NaN	NaN	NaN	NaN	NaN	NaN	-4.6876	-0.946148
357.5		NaN	NaN	NaN	NaN	NaN	NaN	2.24564	-0.193874		NaN	NaN	NaN	NaN	NaN	NaN	-2.27216	5.93312
358.5		NaN	NaN	NaN	NaN	NaN	NaN	2.24564	5.85498		NaN	NaN	NaN	NaN	NaN	NaN	-1.06323	-2.84617
359.5		NaN	NaN	NaN	NaN	NaN	NaN	1.62597	3.58666		NaN	NaN	NaN	NaN	NaN	NaN	3.35866	0.999698
360.5		NaN	NaN	NaN	NaN	NaN	NaN	1.62597	5.85498		NaN	NaN	NaN	NaN	NaN	NaN	-3.30569	5.217
361.5		NaN	NaN	NaN	NaN	NaN	NaN	-1.47238	11.9038		NaN	NaN	NaN	NaN	NaN	NaN	7.92458	-2.48155
362.5		NaN	NaN	NaN	NaN	NaN	NaN	2.55548	7.3672		NaN	NaN	NaN	NaN	NaN	NaN	2.67511	2.86968
363.5		NaN	NaN	NaN	NaN	NaN	NaN	4.72433	11.9038		NaN	NaN	NaN	NaN	NaN	NaN	3.68259	-5.1926
364.5		NaN	NaN	NaN	NaN	NaN	NaN	4.72433	7.3672		NaN	NaN	NaN	NaN	NaN	NaN	-1.04686	0.930374
365.5		NaN	NaN	NaN	NaN	NaN	NaN	5.344	10.3916		NaN	NaN	NaN	NaN	NaN	NaN	1.5779	1.24331
366.5		NaN	NaN	NaN	NaN	NaN	NaN	5.65383	5.85498		NaN	NaN	NaN	NaN	NaN	NaN	6.85819	0.529232
367.5		NaN	NaN	NaN	NaN	NaN	NaN	4.72433	5.85498		NaN	NaN	NaN	NaN	NaN	NaN	1.32631	1.50131
368.5		NaN	NaN	NaN	NaN	NaN	NaN	7.20301	8.87941		NaN	NaN	NaN	NaN	NaN	NaN	1.58963	1.46582
369.5		NaN	NaN	NaN	NaN	NaN	NaN	-2.40189	-0.193874		NaN	NaN	NaN	NaN	NaN	NaN	-4.02546	-2.52479
370.5		NaN	NaN	NaN	NaN	NaN	NaN	-8.90843	-9.26716		NaN	NaN	NaN	NaN	NaN	NaN	-4.14506	-1.64384
371.5		NaN	NaN	NaN	NaN	NaN	NaN	-8.28876	-7.75494		NaN	NaN	NaN	NaN	NaN	NaN	-4.70217	-4.45871
372.5		NaN	NaN	NaN	NaN	NaN	NaN	-7.04941	4.34277		NaN	NaN	NaN	NaN	NaN	NaN	-2.31688	0.222124
373.5		NaN	NaN	NaN	NaN	NaN	NaN	-3.64123	5.85498		NaN	NaN	NaN	NaN	NaN	NaN	-5.12742	-0.165942
374.5		NaN	NaN	NaN	NaN	NaN	NaN	-1.47238	5.85498		NaN	NaN	NaN	NaN	NaN	NaN	5.54942	-1.41504
375.5		NaN	NaN	NaN	NaN	NaN	NaN	2.24564	7.3672		NaN	NaN	NaN	NaN	NaN	NaN	2.88351	3.72986
376.5		NaN	NaN	NaN	NaN	NaN	NaN	2.24564	7.3672		NaN	NaN	NaN	NaN	NaN	NaN	2.57278	-1.17021
377.5		NaN	NaN	NaN	NaN	NaN	NaN	-0.233039	5.85498		NaN	NaN	NaN	NaN	NaN	NaN	-1.08892	-0.05269
378.5		NaN	NaN	NaN	NaN	NaN	NaN	2.24564	5.85498		NaN	NaN	NaN	NaN	NaN	NaN	-0.198388	2.62279
379.5		NaN	NaN	NaN	NaN	NaN	NaN	2.24564	5.85498		NaN	NaN	NaN	NaN	NaN	NaN	0.242292	-2.50305
380.5		NaN	NaN	NaN	NaN	NaN	NaN	1.62597	4.34277		NaN	NaN	NaN	NaN	NaN	NaN	1.7523	1.19581
381.5		NaN	NaN	NaN	NaN	NaN	NaN	2.24564	5.85498		NaN	NaN	NaN	NaN	NaN	NaN	-1.39129	-2.64454
382.5		NaN	NaN	NaN	NaN	NaN	NaN	2.24564	5.85498		NaN	NaN	NaN	NaN	NaN	NaN	-2.86559	-2.71571
383.5		NaN	NaN	NaN	NaN	NaN	NaN	-6.42974	-9.26716		NaN	NaN	NaN	NaN	NaN	NaN	-12.406	-0.428119
384.5		NaN	NaN	NaN	NaN	NaN	NaN	-13.2461	-15.316		NaN	NaN	NaN	NaN	NaN	NaN	-8.5816	-3.44965
385.5		NaN	NaN	NaN	NaN	NaN	NaN	-13.2461	-4.73052		NaN	NaN	NaN	NaN	NaN	NaN	-1.1136	-4.4652
386.5		NaN	NaN	NaN	NaN	NaN	NaN	-13.2461	-7.75494		NaN	NaN	NaN	NaN	NaN	NaN	-5.121	-0.499179
387.5		NaN	NaN	NaN	NaN	NaN	NaN	-7.35925	-2.46219		NaN	NaN	NaN	NaN	NaN	NaN	-7.54874	-3.67791
388.5		NaN	NaN	NaN	NaN	NaN	NaN	-7.66909	-1.70609		NaN	NaN	NaN	NaN	NaN	NaN	-6.06033	-4.17462
389.5		NaN	NaN	NaN	NaN	NaN	NaN	-5.1904	-1.70609		NaN	NaN	NaN	NaN	NaN	NaN	-6.23214	-4.68345
390.5		NaN	NaN	NaN	NaN	NaN	NaN	-3.56377	5.09888		NaN	NaN	NaN	NaN	NaN	NaN	-6.67709	-3.5218
391.5		NaN	NaN	NaN	NaN	NaN	NaN	-3.95106	-1.70609		NaN	NaN	NaN	NaN	NaN	NaN	-8.16855	-2.93662
392.5		NaN	NaN	NaN	NaN	NaN	NaN	-13.2461	-9.26716		NaN	NaN	NaN	NaN	NaN	NaN	-6.14565	-4.46913
393.5		NaN	NaN	NaN	NaN	NaN	NaN	-10.1478	-9.26716		NaN	NaN	NaN	NaN	NaN	NaN	0.668036	-3.8853
394.5		NaN	NaN	NaN	NaN	NaN	NaN	-5.50024	-0.949981		NaN	NaN	NaN	NaN	NaN	NaN	-3.39795	-4.58994
395.5		NaN	NaN	NaN	NaN	NaN	NaN	-3.95106	4.34277		NaN	NaN	NaN	NaN	NaN	NaN	-4.60621	2.09165
396.5		NaN	NaN	NaN	NaN	NaN	NaN	-3.95106	-0.193874		NaN	NaN	NaN	NaN	NaN	NaN	-3.22854	-6.95731
397.5		NaN	NaN	NaN	NaN	NaN	NaN	-7.97892	-11.5355		NaN	NaN	NaN	NaN	NaN	NaN	-8.92759	-4.43993
398.5		NaN	NaN	NaN	NaN	NaN	NaN	-15.1051	-18.3404		NaN	NaN	NaN	NaN	NaN	NaN	-15.5668	-6.68113
399.5		NaN	NaN	NaN	NaN	NaN	NaN	-15.1051	-10.7794		NaN	NaN	NaN	NaN	NaN	NaN	-1.8672	-6.95953
400.5		NaN	NaN	NaN	NaN	NaN	NaN	-13.2461	-7.75494		NaN	NaN	NaN	NaN	NaN	NaN	-7.5238	-5.36615

[truncated: 12 more sheets: Figure 6E, Fig6F, Fig7B, Fig8B, Fig8C, Fig8D, Fig8E, Fig9C, Fig10A, Fig10B, Fig10C, Fig11-2]
